# Supplementary material for: Atraumatic Restorative Treatment as public policy: a systematic review
Source: Research Square preprint supplement (doi:10.21203/rs.3.rs-1318899/v1), 2022-02-21
Supplement: Supplementary file 1 [file bf17fc9cd3a505d1f3cb5625.pdf]

| Table 7 - Supplementary information file: raw data from the selection process                                                                                                                                                                           |                                                                                                          |                                                                                                             |                                                |                                                               |                                                                                                                                                      |                                                           |
|---------------------------------------------------------------------------------------------------------------------------------------------------------------------------------------------------------------------------------------------------------|----------------------------------------------------------------------------------------------------------|-------------------------------------------------------------------------------------------------------------|------------------------------------------------|---------------------------------------------------------------|------------------------------------------------------------------------------------------------------------------------------------------------------|-----------------------------------------------------------|
| Title                                                                                                                                                                                                                                                   | Inclusion criterias 1 (public oral health policy OR dental caries OR ART) - 1. included/ 2. not included | Exclusion criteria 1 (dental caries and/or restorative materials, and or ART outside the policies context ) | Exclusion criteria 2 (specific interventions ) | Exclusion criteria 3 (Oral health policy, not related to ART) | Exclusion criteria 4( studies that contained duplicated data with primary studies or that do not address the issue in the context of implementation) | Studies included in review (1. included/ 2. not included) |
| A 5-year follow-up of older adults residing in long-term care facilities: utilisation of a comprehensive dental programme                                                                                                                               | 1                                                                                                        |                                                                                                             |                                                | X                                                             |                                                                                                                                                      | 2                                                         |
| A case-control study of differences between regular and causal adult attenders in general dental practice                                                                                                                                               | 1                                                                                                        |                                                                                                             |                                                | X                                                             |                                                                                                                                                      | 2                                                         |
| A clinical evaluation of resin-based composite and glass ionomer cement restorations placed in primary teeth using the ART approach: results at 24 months                                                                                               | 1                                                                                                        | X                                                                                                           |                                                |                                                               |                                                                                                                                                      | 2                                                         |
| A community health center dental program in Boston, U.S.A                                                                                                                                                                                               | 1                                                                                                        |                                                                                                             |                                                | X                                                             |                                                                                                                                                      | 2                                                         |
| A comparative study of fluoride release from two different sealants                                                                                                                                                                                     | 1                                                                                                        | X                                                                                                           |                                                |                                                               |                                                                                                                                                      | 2                                                         |
| A comparative study of the clinical efficiency of chemomechanical caries removal using Carie-Care gel for permanent teeth of children of age group of 12-15 years with that of conventional drilling method: A randomized controlled trial              | 1                                                                                                        | X                                                                                                           |                                                |                                                               |                                                                                                                                                      | 2                                                         |
| A comparison of dental caries and tooth loss for Iowa prisoners with other prison populations and dentate U.S. adults                                                                                                                                   | 1                                                                                                        | X                                                                                                           |                                                |                                                               |                                                                                                                                                      | 2                                                         |
| A comparison of the effectiveness of the "Toothkeeper" and a traditional dental health education program                                                                                                                                                | 1                                                                                                        | X                                                                                                           |                                                |                                                               |                                                                                                                                                      | 2                                                         |
| A comparison of the sedation provision of NHS dental services 2014-2016 for local authorities throughout England                                                                                                                                        | 1                                                                                                        |                                                                                                             |                                                | X                                                             |                                                                                                                                                      | 2                                                         |
| A dental care programme for occasional dental attenders                                                                                                                                                                                                 | 1                                                                                                        |                                                                                                             |                                                | X                                                             |                                                                                                                                                      | 2                                                         |
| A escola como espaço promotor de saúde bucal: cuidando de escolares por meio de ações coletivas/ The school space as promoter of oral health: caring for children through collective programs                                                           | 1                                                                                                        |                                                                                                             | X                                              |                                                               |                                                                                                                                                      | 2                                                         |
| A field program of planned dental treatment and dental health education in Tonaki (Okinawa prefecture) (author's transl)]                                                                                                                               | 1                                                                                                        |                                                                                                             | X                                              |                                                               |                                                                                                                                                      | 2                                                         |
| A group of general dental practitioners' views of preformed metal crowns after participation in the Hall technique clinical trial: a mixed-method evaluation.                                                                                           | 1                                                                                                        | X                                                                                                           |                                                |                                                               |                                                                                                                                                      | 2                                                         |
| A method of planning a dental treatment program for an institutionalized population                                                                                                                                                                     | 1                                                                                                        | X                                                                                                           |                                                |                                                               |                                                                                                                                                      | 2                                                         |
| A mobile dental system in southern Africa                                                                                                                                                                                                               | 1                                                                                                        |                                                                                                             | X                                              |                                                               |                                                                                                                                                      | 2                                                         |
| A pilot of a school-based dental treatment programme for vulnerable children with possible dental neglect: the Back2School programme                                                                                                                    | 1                                                                                                        |                                                                                                             | X                                              |                                                               |                                                                                                                                                      | 2                                                         |
| A PILOT TRIAL OF THE IMPACT OF FINANCIAL INCENTIVE ON THE UTILIZATION OF DENTAL SERVICES AMONG CIVIL SERVANTS IN IBADAN, NIGERIA                                                                                                                        | 1                                                                                                        | X                                                                                                           |                                                |                                                               |                                                                                                                                                      | 2                                                         |
| A prospective and randomized clinical trial evaluating the effectiveness of ART restorations with high-viscosity glass-ionomer cement versus conventional restorations with resin composite in Class II cavities of permanent teeth: two-year follow-up | 1                                                                                                        | X                                                                                                           |                                                |                                                               |                                                                                                                                                      | 2                                                         |
| A study on the epidemiology of permanent tooth caries in children aged 15 years in Anhui province]                                                                                                                                                      | 1                                                                                                        | X                                                                                                           |                                                |                                                               |                                                                                                                                                      | 2                                                         |
| A study on the state of dental treatment and carious diseases after treatment in industrial workers, especially on amalgam filling, inlay restoration and clasp application]                                                                            | 1                                                                                                        | X                                                                                                           |                                                |                                                               |                                                                                                                                                      | 2                                                         |
| A utilização do tratamento restaurador atraumático modificado na clínica de odontopediatria/ Use of modified atraumatic restorative treatment in paediatric dentistry clinic                                                                            | 1                                                                                                        | X                                                                                                           |                                                |                                                               |                                                                                                                                                      | 2                                                         |
| Academic recommendations on the need for treating carious deciduous molars and canine teeth in elementary school children--results of a survey of university dental clinics]                                                                            | 1                                                                                                        | X                                                                                                           |                                                |                                                               |                                                                                                                                                      | 2                                                         |

|                                                                                                                                                                                                                                                                                                                                                     |   |   |   |   |  |   |
|-----------------------------------------------------------------------------------------------------------------------------------------------------------------------------------------------------------------------------------------------------------------------------------------------------------------------------------------------------|---|---|---|---|--|---|
| Acceptance of Minimally Invasive Dentistry Among US Dentists in Public Health Practices.                                                                                                                                                                                                                                                            | 1 |   | X |   |  | 2 |
| Access to oral healthcare services of adolescents of a large-size municipality in northeastern Brazil                                                                                                                                                                                                                                               | 1 |   |   | X |  | 2 |
| Access to special care dentistry, part 5. Safety                                                                                                                                                                                                                                                                                                    | 1 |   |   | X |  | 2 |
| Access to special care dentistry, part 8. Special care dentistry services: seamless care for people in their middle years - part 2                                                                                                                                                                                                                  | 1 |   |   | X |  | 2 |
| Aceitabilidade do tratamento restaurador atraumático pelos cirurgiões-dentistas do serviço público em São Paulo/ Atraumatic Restorative Treatment acceptability by dentists in the public service of São Paulo                                                                                                                                      | 1 | X |   |   |  | 2 |
| Adequação do meio bucal através de tratamento restaurador atraumático modificado em pacientes pediátricos infectados pelo Vírus da Imunodeficiência Humana Adquirida (SIDA)/ Adequacy of the oral cavity by means of modified atraumatic restorative treatment in pediatric patients infected with the Acquired Human Immunodeficiency Virus (AIDS) | 1 | X |   |   |  | 2 |
| Adherence to an oral health program for HIV infected children and adolescents and the attitudes of their caretakers]                                                                                                                                                                                                                                | 1 |   |   | X |  | 2 |
| Adults' dental treatment in 2001-2013 in Finnish public dental service                                                                                                                                                                                                                                                                              | 1 |   |   | X |  | 2 |
| Aerosol-free procedures against COVID-19 in pediatric dentistry                                                                                                                                                                                                                                                                                     | 1 | X |   |   |  | 2 |
| An assessment of strategies to control dental caries in Aboriginal children living in rural and remote communities in New South Wales, Australia                                                                                                                                                                                                    | 1 | X |   |   |  | 2 |
| An evaluation of a school-based dental sealant programme                                                                                                                                                                                                                                                                                            | 1 | X |   |   |  | 2 |
| Analysis of prevalence and trends of dental caries in the Americas between the 1970s and 1990s.                                                                                                                                                                                                                                                     | 1 | X |   |   |  | 2 |
| Application of International Caries Detection and Assessment System (ICDAS) and Caries Management by Risk Assessment (CAMBRA) systems in child cancer patients: a clinical case report                                                                                                                                                              | 1 | X |   |   |  | 2 |
| ART integration in oral health care systems in Latin American countries as perceived by directors of oral health                                                                                                                                                                                                                                    | 1 |   |   |   |  | 1 |
| ART restorations and glass ionomer sealants in Zimbabwe: survival after 3 years                                                                                                                                                                                                                                                                     | 1 |   |   |   |  | 1 |
| ART with high viscosity GIC and composite restorations in class II cavities: can they thrive in the post-amalgam era?                                                                                                                                                                                                                               | 1 | X |   |   |  | 2 |
| ART: a minimal intervention approach to manage dental caries.                                                                                                                                                                                                                                                                                       | 1 | X |   |   |  | 2 |
| ARTiculating concerns about interim therapeutic restorations                                                                                                                                                                                                                                                                                        | 1 | X |   |   |  | 2 |
| Aspectos atuais do tratamento restaurador atraumático/ Current aspects of atraumatic restorative treatment                                                                                                                                                                                                                                          | 1 | X |   |   |  | 2 |
| Assessing changes in oral health-related quality of life and body growth in 3-5 years old children following dental treatment under general anaesthesia due to severe dental caries                                                                                                                                                                 | 1 | X |   |   |  | 2 |
| Assessment of anxiety and stress markers in children submitted to educational strategies and ART-restoration: A randomized clinical trial                                                                                                                                                                                                           | 1 | X |   |   |  | 2 |
| Assessment of Atraumatic Restorative Treatment (ART) on the permanent dentition in a primary care setting in Nigeria                                                                                                                                                                                                                                | 1 |   | X |   |  | 2 |
| Assessment of Discomfort Experienced by School Children While Performing 'ART' and 'MCP'-An Experimental Study                                                                                                                                                                                                                                      | 1 | X |   |   |  | 2 |
| Association between oral health-related quality of life and atraumatic restorative treatment in school children: an exploratory study                                                                                                                                                                                                               | 1 | X |   |   |  | 2 |
| Associations between Child Snack and Beverage Consumption, Severe Dental Caries, and Malnutrition in Nepal                                                                                                                                                                                                                                          | 1 | X |   |   |  | 2 |
| Atraumatic dental treatment among Finnish elderly persons                                                                                                                                                                                                                                                                                           | 1 | X |   |   |  | 2 |

|                                                                                                                                                                                                                                                                                                                |   |   |   |  |   |   |
|----------------------------------------------------------------------------------------------------------------------------------------------------------------------------------------------------------------------------------------------------------------------------------------------------------------|---|---|---|--|---|---|
| Atraumatic Restorative Treatment (ART) in pediatric dentistry residency programs: a survey of program directors                                                                                                                                                                                                | 1 | X |   |  |   | 2 |
| Atraumatic restorative treatment (ART): a three-year clinical study in Malawi--comparison of conventional amalgam and ART restorations                                                                                                                                                                         | 1 | X |   |  |   | 2 |
| Atraumatic restorative treatment (ART): rationale, technique, and development                                                                                                                                                                                                                                  | 1 | X |   |  |   | 2 |
| Atraumatic Restorative Treatment (ART): the Tanzanian experience.                                                                                                                                                                                                                                              | 1 |   |   |  |   | 1 |
| Atraumatic Restorative Treatment (ART). A special tissue preservative and patient-friendly approach]                                                                                                                                                                                                           | 1 | X |   |  |   | 2 |
| Atraumatic restorative treatment and dental anxiety in outpatients attending public oral health clinics in South Africa                                                                                                                                                                                        | 1 |   | X |  |   | 2 |
| Atraumatic restorative treatment and glass ionomer sealants in Tunisian children: survival after 3 years                                                                                                                                                                                                       | 1 |   |   |  |   | 1 |
| Atraumatic restorative treatment and glass-ionomer sealants in a school oral health programme in Zimbabwe: evaluation after 1 year                                                                                                                                                                             | 1 |   |   |  |   | 1 |
| Atraumatic restorative treatment and oral health in Upper Egypt                                                                                                                                                                                                                                                | 1 |   |   |  |   | 1 |
| Atraumatic restorative treatment compared to the Hall Technique for occluso-proximal carious lesions in primary molars; 36-month follow-up of a randomised control trial in a school setting.                                                                                                                  | 1 | X |   |  |   | 2 |
| Atraumatic Restorative Treatment compared to the Hall Technique for occluso-proximal cavities in primary molars: study protocol for a randomized controlled trial                                                                                                                                              | 1 | X |   |  |   | 2 |
| Atraumatic restorative treatment for prevention and treatment of caries in an underserved community                                                                                                                                                                                                            | 1 |   | X |  |   | 2 |
| Atraumatic restorative treatment to control dental caries: history, characteristics, and contributions of the technique]                                                                                                                                                                                       | 1 |   |   |  | X | 2 |
| Atraumatic restorative treatment versus conventional restorative treatment for managing dental caries                                                                                                                                                                                                          | 1 | X |   |  |   | 2 |
| Atraumatic restorative treatment, as part of a basic package of oral health services in rural areas of Bolivia: evidence on the effectiveness of atraumatic restoration treatment implementation and of oral health promotion measures among 6-14 year-old students, in rural areas with dispersed population] | 1 |   |   |  |   | 1 |
| Atraumatic restorative treatments improve child oral health-related quality of life: A noninferiority randomized controlled trial                                                                                                                                                                              | 1 | X |   |  |   | 2 |
| Atraumatic Restorative Treatments in Australian Aboriginal Communities: A Cluster-randomized Trial                                                                                                                                                                                                             | 1 | X |   |  |   | 2 |
| Atraumatic restorative treatments reduce the need for dental general anaesthesia: a non-inferiority randomized                                                                                                                                                                                                 | 1 | X |   |  |   | 2 |
| Attitudes of Chinese parents toward the oral health of their children with caries: a qualitative study                                                                                                                                                                                                         | 1 | X |   |  |   | 2 |
| Avaliação clínica da alteração da microflora oral por meio da utilização do tratamento restaurador atraumático (AU)/ Clinical assessment on the oral microflora alteration through the use of atraumatic restorative treatment                                                                                 | 1 | X |   |  |   | 2 |
| Avaliação da efetividade da técnica do tratamento restaurador atraumático (TRA) e sua aplicabilidade em saúde pública nas crianças das creches do município de Belém-Pará                                                                                                                                      | 1 |   | X |  |   | 2 |
| Avaliação da percepção das equipes de saúde bucal da Secretaria Municipal da Saúde de Curitiba (PR) sobre o tratamento restaurador atraumático (ART)./ [Evaluation of the perception of the oral health teams of the municipal health department of Curitiba                                                   | 1 | X |   |  |   | 2 |
| Avaliação de restaurações realizadas com cimento de ionômero de vidro nacional no tratamento restaurador atraumático/ Evaluation of restorations performed with brazilian glass ionomer cement in atraumatic restorative treatment                                                                             | 1 | X |   |  |   | 2 |

|                                                                                                                                                                                                                                                 |   |   |   |   |   |   |
|-------------------------------------------------------------------------------------------------------------------------------------------------------------------------------------------------------------------------------------------------|---|---|---|---|---|---|
| Avaliação do grau de satisfação dos responsáveis em relação à utilização da técnica do tratamento restaurador atraumático em crianças/ Caregivers' satisfaction regarding the use of the atraumatic restorative treatment technique in children | 1 |   | X |   |   | 2 |
| Avaliação dos selantes de ionômero em primeiros molares permanentes recém erupcionados/ Evaluation of ionomer sealants in newly erupted first permanent molars                                                                                  | 1 | X |   |   |   | 2 |
| Barriers to restorative care as perceived by dental patients attending government hospitals in Tanzania                                                                                                                                         | 1 |   |   |   | X | 2 |
| Barriers to restorative care as perceived by dental practitioners in Tanzania                                                                                                                                                                   | 1 |   |   |   | X | 2 |
| Barriers to the adoption of the ART approach as perceived by dental practitioners in governmental dental clinics, in Tanzania                                                                                                                   | 1 |   |   |   |   | 1 |
| Beneath the surface of coronal caries: primary decay, recurrent decay, and failed restorations in a population-based survey of New England elders                                                                                               | 1 | X |   |   |   | 2 |
| Benefits of a community oriented fluoride mouth rinsing program]                                                                                                                                                                                | 1 | X |   |   |   | 2 |
| Brazilian Oral Health Policy: factors associated with comprehensiveness in health care                                                                                                                                                          | 1 |   |   | X |   | 2 |
| Building community support for a school dental sealant program                                                                                                                                                                                  | 1 | X |   |   |   | 2 |
| Can minimal intervention dentistry help in tackling the global burden of untreated dental caries?                                                                                                                                               | 1 | X |   |   |   | 2 |
| Caregiver satisfaction with interim silver diamine fluoride applications for their children with caries prior to operating room treatment or sedation                                                                                           | 1 | X |   |   |   | 2 |
| Cárie dentária em escolares: impacto na qualidade de vida e uso do tratamento restaurador atraumático como solução parcial da demanda/ Dental caries in school: impact on quality of life and partial solution of demand                        | 1 | X |   |   |   | 2 |
| Caries and the older patient                                                                                                                                                                                                                    | 1 | X |   |   |   | 2 |
| Caries experience and treatment need among adults responding to an invitation for dental examination and treatment in two Karelian communities in Russia                                                                                        | 1 | X |   |   |   | 2 |
| Caries experience in rural Victorian adolescents                                                                                                                                                                                                | 1 | X |   |   |   | 2 |
| Caries experience in the primary dentition and presence of plaque in 7-year-old Chinese children: A 4-year time-lag study                                                                                                                       | 1 | X |   |   |   | 2 |
| Caries experience of Egyptian adolescents: does the atraumatic restorative treatment approach offer a solution?                                                                                                                                 | 1 | X |   |   |   | 2 |
| Caries experience of leukemic children during intensive course of chemotherapy                                                                                                                                                                  | 1 | X |   |   |   | 2 |
| Caries in Croatian Army recruits in 2000]                                                                                                                                                                                                       | 1 | X |   |   |   | 2 |
| Caries prevalence and treatment needs in young people in Portugal: the third national study                                                                                                                                                     | 1 | X |   |   |   | 2 |
| Caries prevalence in primary teeth of German and foreign children within the scope of the 1995/96 school entrance examination in Dusseldorf]                                                                                                    | 1 | X |   |   |   | 2 |
| Caries prevalence of school-going boys and girls according to cleaning methods and soft drink-taking frequency in different localities, in and around Guwahati City                                                                             | 1 | X |   |   |   | 2 |
| Caries treatment in Swedish adults: effectiveness, costs and equity. A 4-year follow-up study of data from the Swedish national dental health register                                                                                          | 1 | X |   |   |   | 2 |
| Caries-preventive effect of a one-time application of composite resin and glass ionomer sealants after 5 years                                                                                                                                  | 1 | X |   |   |   | 2 |
| Carious lesions in permanent dentitions are reduced in remote Indigenous Australian children taking part in a non-randomised preventive trial                                                                                                   | 1 | X |   |   |   | 2 |

|                                                                                                                                                                                                |   |   |   |  |  |   |
|------------------------------------------------------------------------------------------------------------------------------------------------------------------------------------------------|---|---|---|--|--|---|
| Cartilha para subsidiar a realização do tratamento restaurador atraumático em larga escala: TRA/ Primer to support the preparation of the atraumatic restorative treatment in large scale: TRA | 1 |   | X |  |  | 2 |
| Change in children's oral health-related quality of life following dental treatment under general anaesthesia for the management of dental caries: a systematic review                         | 1 | X |   |  |  | 2 |
| Change in Oral Health-Related Quality of Life Following Minimally Invasive Aesthetic Treatment for Children with Molar Incisor Hypomineralisation: A Prospective Study                         | 1 | X |   |  |  | 2 |
| Changes in dental caries prevalence in 12-year-old students in the State of Mexico after 9 years of salt fluoridation                                                                          | 1 | X |   |  |  | 2 |
| Changes in preschool children's OHRQoL after treatment of dental caries: responsiveness of the B-ECOHIS                                                                                        | 1 | X |   |  |  | 2 |
| Changes in restorative caries treatment in 15-year-olds in Oslo, Norway, 1979-1996                                                                                                             | 1 | X |   |  |  | 2 |
| Changes in the quality of life of Tanzanian school children after treatment interventions using the Child-OIDP                                                                                 | 1 |   | X |  |  | 2 |
| Chewing deficiencies in adults with multiple untreated carious lesions                                                                                                                         | 1 | X |   |  |  | 2 |
| Child oral health-related quality of life (COHQoL), enamel defects of the first permanent molars and caries experience among children in Western Australia                                     | 1 | X |   |  |  | 2 |
| Children and adolescents' dental treatment in 2001-2013 in the Finnish public dental service                                                                                                   | 1 | X |   |  |  | 2 |
| Children's Oral Health-related Quality of Life (OHRQoL) Three Years after Implementation of Treatment Protocols for Managing Cavitated Carious Dentine Lesions                                 | 1 | X |   |  |  | 2 |
| China's oral care system in transition: lessons to be learned from Germany                                                                                                                     | 1 | X |   |  |  | 2 |
| City-level gender differentials in the prevalence of dental caries and restorative dental treatment                                                                                            | 1 | X |   |  |  | 2 |
| Clinical evaluation of the ART approach and materials in peri-urban farm schools of the Johannesburg area                                                                                      | 1 |   | X |  |  | 2 |
| Comments on Public Health Aspects of Paediatric Dental Treatment under General Anaesthesia. Dent. J. 2016, 4, 20                                                                               | 1 | X |   |  |  | 2 |
| Community-based prevention and early intervention strategies.                                                                                                                                  | 1 | X |   |  |  | 2 |
| Comparative cost of ART and conventional treatment within a dental school clinic                                                                                                               | 1 |   | X |  |  | 2 |
| Comparative Effectiveness of Two Nonsurgical Treatments to Reduce Oral Health Disparities From Untreated Tooth Decay in Older Adults: Protocol for a Cluster Randomized Trial                  | 1 | X |   |  |  | 2 |
| Comparing medical and dental providers of oral health services on early dental caries experience                                                                                               | 1 | X |   |  |  | 2 |
| Comparison of two minimally invasive methods on the longevity of glass ionomer cement restorations: short-term results of a pilot study                                                        | 1 | X |   |  |  | 2 |
| Comparison of two preventive interventions on dental caries among children in Democratic People's Republic of Korea                                                                            | 1 | X |   |  |  | 2 |
| Comprehensive dental care for children with rampant caries under general anaesthesia                                                                                                           | 1 | X |   |  |  | 2 |
| Comprehensive Oral Health Care to Reduce the Incidence of Severe Early Childhood Caries (s-ECC) in Urban China                                                                                 | 1 | X |   |  |  | 2 |
| Conclusions from the symposium: Two decades of ART: success through research                                                                                                                   | 1 | X |   |  |  | 2 |
| Contextual and Individual Determinants of Root Caries in Older People                                                                                                                          | 1 | X |   |  |  | 2 |

|                                                                                                                                                                         |   |   |  |   |  |   |
|-------------------------------------------------------------------------------------------------------------------------------------------------------------------------|---|---|--|---|--|---|
| Contrasting patterns of caries profile and dental treatment in pupils of 16-18 years in South African ethnic groups                                                     | 1 | X |  |   |  | 2 |
| CORRELATION OF ORAL HEALTH HOME-CARE PRACTICES, SNACKING HABITS AND DENTAL CARIES EXPERIENCE AMONG HIV-POSITIVE CHILDREN IN NAIROBI, KENYA                              | 1 | X |  |   |  | 2 |
| Cost-effectiveness analysis of a school-based dental caries prevention program using fluoridated milk in Bangkok, Thailand                                              | 1 | X |  |   |  | 2 |
| Cost-effectiveness of a telephone-delivered education programme to prevent early childhood caries in a disadvantaged area: a cohort study                               | 1 | X |  |   |  | 2 |
| Cost-effectiveness of ART restorations in elderly adults: a randomized clinical trial                                                                                   | 1 | X |  |   |  | 2 |
| Cost-efficiency of a community dental delivery program for migrant children                                                                                             | 1 | X |  |   |  | 2 |
| Costs and benefits of Papacarie in pediatric dentistry: a randomized clinical trial                                                                                     | 1 | X |  |   |  | 2 |
| Dawn of a New Age Fissure Sealant? A Study Evaluating the Clinical Performance of Embrace WetBond and ART Sealants: Results from a Randomized Controlled Clinical Trial | 1 | X |  |   |  | 2 |
| Deaths associated with GA for dentistry 1948 - 2016: the evolution of a policy for general anaesthesia (GA) for dental treatment                                        | 1 |   |  | X |  | 2 |
| Dental auxiliaries for dental care traditionally provided by dentists.                                                                                                  | 1 | X |  |   |  | 2 |
| Dental avoidance among adolescents - a retrospective case -control study based on dental records in the public dental service in a Swedish county                       | 1 | X |  |   |  | 2 |
| Dental care to the Israeli Defense Forces' fighters]                                                                                                                    | 1 | X |  |   |  | 2 |
| Dental caries among disabled individuals attending special schools in Vhembe district, South Africa                                                                     | 1 | X |  |   |  | 2 |
| Dental caries among urban schoolchildren in Madagascar                                                                                                                  | 1 | X |  |   |  | 2 |
| Dental caries amongst mentally retarded people and those suffering from Down's syndrome]                                                                                | 1 | X |  |   |  | 2 |
| Dental caries and dental health behavior of patients with primary Sjögren syndrome                                                                                      | 1 | X |  |   |  | 2 |
| Dental caries and need for dental care among the Baniwa Indians, Rio Negro, Amazonas]                                                                                   | 1 | X |  |   |  | 2 |
| Dental caries and the associated factors influencing it in tribal, suburban and urban school children of Tamil Nadu, India: a cross sectional study                     | 1 | X |  |   |  | 2 |
| Dental caries and treatment needs among indigenous people of the Potiguara Indian reservation in Brazil                                                                 | 1 | X |  |   |  | 2 |
| Dental caries and treatment needs in adolescents from the state of São Paulo, 1998 and 2002                                                                             | 1 | X |  |   |  | 2 |
| Dental caries and treatment needs of Yemeni children with down syndrome                                                                                                 | 1 | X |  |   |  | 2 |
| Dental caries experience, oral health status and treatment needs of dental patients with autism                                                                         | 1 | X |  |   |  | 2 |
| Dental caries in children under age three attending a university clinic                                                                                                 | 1 | X |  |   |  | 2 |
| Dental caries in homeless adults in Boston                                                                                                                              | 1 | X |  |   |  | 2 |
| Dental caries in six, 12 and 15 year old Venda children in South Africa                                                                                                 | 1 | X |  |   |  | 2 |
| Dental caries in young male adults: prevalence, severity and associated factors                                                                                         | 1 | X |  |   |  | 2 |
| Dental caries knowledge in a group of Northwest Territories children                                                                                                    | 1 | X |  |   |  | 2 |
| Dental caries of refugee children compared with US children                                                                                                             | 1 | X |  |   |  | 2 |
| Dental caries prevalence, tooth brushing and periodontal status in 150 young people in Istanbul: a pilot study                                                          | 1 | X |  |   |  | 2 |

|                                                                                                                                             |   |   |   |   |  |   |
|---------------------------------------------------------------------------------------------------------------------------------------------|---|---|---|---|--|---|
| Dental caries related to quality of life in two Brazilian adolescent groups: a cross-sectional randomised study                             | 1 | X |   |   |  | 2 |
| Dental caries treatment completed under general anesthesia among American Indian children in a northern plains tribal community             | 1 | X |   |   |  | 2 |
| Dental Caries, Body Mass Index, and Diet among Learners at Selected Primary Schools in Pretoria, Gauteng Province, South Africa             | 1 | X |   |   |  | 2 |
| Dental caries, fluorosis, and oral health behavior of children from Herat, Afghanistan                                                      | 1 | X |   |   |  | 2 |
| Dental caries, gingivitis and the treatment needs among 12-year-olds                                                                        | 1 | X |   |   |  | 2 |
| Dental caries: strategies to control this preventable disease                                                                               | 1 | X |   |   |  | 2 |
| Dental health education and promotion in the Ministry of Health schools dental programme                                                    | 1 |   |   | X |  | 2 |
| Dental health policies in Brazil and their impact on health inequalities                                                                    | 1 |   |   | X |  | 2 |
| Dental health status of community-dwelling older Singaporeans: findings from a nationally representative survey                             | 1 |   |   | X |  | 2 |
| Dental Home Visits for Caries Prevention Among Preschool Children: Protocol for a Cost-Effectiveness Analysis on a Randomized Control Trial | 1 | X |   |   |  | 2 |
| Dental insurance and its effects among the elderly in Ontario                                                                               | 1 |   |   | X |  | 2 |
| Dental lesions: diagnosis and treatment                                                                                                     | 1 |   |   | X |  | 2 |
| Dental nurse training in Cambodia--a new approach                                                                                           | 1 |   |   |   |  | 1 |
| Dental practitioners' attitudes, subjective norms and intentions to practice atraumatic restorative treatment (ART) in Tanzania             | 1 |   |   |   |  | 1 |
| Dental Restoration Longevity among Geriatric and Special Needs Patients                                                                     | 1 | X |   |   |  | 2 |
| Dental therapists linked to improved dental outcomes for Alaska Native communities in the Yukon-Kuskokwim Delta                             | 1 | X |   |   |  | 2 |
| Dental treatment and dental health. Part 1. A review of studies in support of a philosophy of Minimum Intervention Dentistry                | 1 | X |   |   |  | 2 |
| Dental treatment and employment outcomes among social assistance recipients in Ontario, Canada                                              | 1 |   |   | X |  | 2 |
| Dental treatment and oral health care on Tokashiki Island, Okinawa]                                                                         | 1 |   |   | X |  | 2 |
| Dental treatment for disabled children in the Spanish Public Health System                                                                  | 1 | X |   |   |  | 2 |
| Dental treatment strategies for elderly patients]                                                                                           | 1 |   |   | X |  | 2 |
| Dentifrices, mouthwashes, and remineralization/caries arrestment strategies                                                                 | 1 | X |   |   |  | 2 |
| Does atraumatic restorative treatment reduce dental anxiety in children? A systematic review and meta-analysis                              | 1 | X |   |   |  | 2 |
| Does dental care improve the oral health of older adults?                                                                                   | 1 |   |   | X |  | 2 |
| Domiciliary assistance dental programs: a current demand]                                                                                   | 1 | X |   |   |  | 2 |
| E-learning used in a training course on atraumatic restorative treatment (ART) for Brazilian dentists                                       | 1 |   | X |   |  | 2 |
| Early childhood caries and dental treatment need in low socio-economic communities in Cape Town, South Africa                               | 1 | X |   |   |  | 2 |
| Early childhood caries and quality of life: child and parent perspectives                                                                   | 1 | X |   |   |  | 2 |
| Early childhood caries--risk factors                                                                                                        | 1 | X |   |   |  | 2 |
| Early childhood caries: recurrence after comprehensive dental treatment under general anaesthesia                                           | 1 | X |   |   |  | 2 |
| Educational strategies and atraumatic restorative treatment effect on salivary characteristics: A controlled clinical trial                 | 1 | X |   |   |  | 2 |
| Effect and acceptance of silver diamine fluoride treatment on dental caries in primary teeth                                                | 1 | X |   |   |  | 2 |
| Effect of controlled oral hygiene procedures on caries and periodontal disease in adults. Results after 6 years                             | 1 | X |   |   |  | 2 |

|                                                                                                                                                                                                                       |   |   |  |   |  |   |
|-----------------------------------------------------------------------------------------------------------------------------------------------------------------------------------------------------------------------|---|---|--|---|--|---|
| Effect of different protocols for treating cavities in primary molars on the quality of life of children in Brazil--1 year follow-up.                                                                                 | 1 | X |  |   |  | 2 |
| Effect of Papacarie and Alternative Restorative Treatment on Pain Reaction during Caries Removal among Children: A Randomized Controlled Clinical Trial                                                               | 1 | X |  |   |  | 2 |
| Effectiveness of ART and traditional amalgam approach in restoring single-surface cavities in posterior teeth of permanent dentitions in school children after 6.3 years.                                             | 1 | X |  |   |  | 2 |
| Effectiveness of glass-ionomer (ART) and amalgam restorations in the deciduous dentition: results after 3 years                                                                                                       | 1 | X |  |   |  | 2 |
| Effects of restoring SDF-treated and untreated dentine caries lesions on parental satisfaction and oral health related quality of life of preschool children                                                          | 1 | X |  |   |  | 2 |
| Efficacy of 30% silver diamine fluoride compared to atraumatic restorative treatment on dentine caries arrestment in primary molars of preschool children: A 12-months parallel randomized controlled clinical trial. | 1 | X |  |   |  | 2 |
| Efficacy of conventional treatment with composite resin and atraumatic restorative treatment in posterior primary teeth: study protocol for a randomised controlled trial.                                            | 1 | X |  |   |  | 2 |
| Epidemiology of dental caries among adults in a rural area in India                                                                                                                                                   | 1 | X |  |   |  | 2 |
| Ethnic disparities in the prevalence of dental caries and restorative dental treatment in Brazilian children                                                                                                          | 1 | X |  |   |  | 2 |
| Evaluation of an early childhood caries prevention program at an urban pediatric clinic                                                                                                                               | 1 | X |  |   |  | 2 |
| Evaluation of Atraumatic Restorative Treatment restorations and sealants under field conditions                                                                                                                       | 1 | X |  |   |  | 2 |
| Evaluation of governmental dental health services in rural health centers in Egypt                                                                                                                                    | 1 | X |  |   |  | 2 |
| Evaluation of Oral Health-Related Quality of Life to Assess Dental Treatment in Preschool Children with Early Childhood Caries: A Preliminary Study                                                                   | 1 | X |  |   |  | 2 |
| Evaluation of salivary interleukin-6 in children with early childhood caries after treatment                                                                                                                          | 1 | X |  |   |  | 2 |
| Even small interventions can improve oral health.                                                                                                                                                                     | 1 | X |  |   |  | 2 |
| Evidence of effectiveness of preventive dental care in reducing dental treatment use and related expenditures                                                                                                         | 1 |   |  | X |  | 2 |
| Evolution of the the ART approach: highlights and achievements                                                                                                                                                        | 1 | X |  |   |  | 2 |
| Experience of non-reversible and reversible carious lesions in 11 and 12 years old Mexican schoolchildren: a negative binomial regression analysis]                                                                   | 1 | X |  |   |  | 2 |
| Experimental model of tooth decay as an educational tool for school-age children]                                                                                                                                     | 1 | X |  |   |  | 2 |
| Explanatory models for clinically determined and symptom-reported caries indicators in an adult population                                                                                                            | 1 | X |  |   |  | 2 |
| Exploring school oral health outcomes and neighbourhood factors in schools participating in Ontario's "Healthy Schools" recognition program                                                                           | 1 | X |  |   |  | 2 |
| Factors affecting levels of untreated caries in a sample of 14-15-year-old adolescents in Northern Ireland                                                                                                            | 1 | X |  |   |  | 2 |
| Factors associated with receiving treatment for dental decay among Medicaid-enrolled children younger than 12 years of age in Iowa, 2010                                                                              | 1 | X |  |   |  | 2 |
| Factors inhibiting the implementation of the Atraumatic Restorative Treatment approach in public oral health services in Gauteng Province, South Africa                                                               | 1 |   |  |   |  | 1 |
| Factors related to tooth loss due to dental caries among workers in an industrial estates in Thailand                                                                                                                 | 1 | X |  |   |  | 2 |

|                                                                                                                                                                                                                     |   |   |   |   |  |   |
|---------------------------------------------------------------------------------------------------------------------------------------------------------------------------------------------------------------------|---|---|---|---|--|---|
| Factors Relating to Access to Dental Care for Indigenous South Australians                                                                                                                                          | 1 | X |   |   |  | 2 |
| Factors that drive dentists towards or away from dental caries preventive measures: systematic review and metasummary                                                                                               | 1 | X |   |   |  | 2 |
| Failure rate of high-viscosity GIC based ART compared with that of conventional amalgam restorations--evidence from an update of a systematic review                                                                | 1 | X |   |   |  | 2 |
| First-molar caries experience among Taiwanese first-grade children                                                                                                                                                  | 1 | X |   |   |  | 2 |
| Follow-up of an Intervention to Reduce Dental Caries in Indigenous Australian Children: A Secondary Analysis of a Randomized Clinical Trial                                                                         | 1 | X |   |   |  | 2 |
| Front-of-Package Food Labeling to Reduce Caries: Economic Evaluation                                                                                                                                                | 1 | X |   |   |  | 2 |
| GambiaDentCare - evaluation of a primary oral health-care programme in West Africa]                                                                                                                                 | 1 | X |   |   |  | 2 |
| General dental care for the elderly                                                                                                                                                                                 | 1 | X |   |   |  | 2 |
| Giving policy some teeth: routes to reducing disparities in oral health                                                                                                                                             | 1 |   |   | X |  | 2 |
| Glass ionomer ART sealants in Chinese school children-6-year results.                                                                                                                                               | 1 |   | X |   |  | 2 |
| Greater inequalities in dental treatment than in disease experience                                                                                                                                                 | 1 |   |   | X |  | 2 |
| Health care charges: lessons from the U.K                                                                                                                                                                           | 1 |   |   | X |  | 2 |
| Health care savings from microbiological caries risk screening of toddlers: a cost estimation model                                                                                                                 | 1 | X |   |   |  | 2 |
| Health educational aspects of preventive dental programs for school-age children in 34 countries--final results of an FDI international survey                                                                      | 1 |   |   | X |  | 2 |
| High-viscosity glass-ionomer cements for direct posterior tooth restorations in permanent teeth: The evidence in brief                                                                                              | 1 | X |   |   |  | 2 |
| High-viscosity glass-ionomer vs. composite resin restorations in persons with disability: Five-year follow-up of clinical trial                                                                                     | 1 | X |   |   |  | 2 |
| How effective is ART in the management of dental caries?                                                                                                                                                            | 1 | X |   |   |  | 2 |
| How to Intervene in the Root Caries Process? Systematic Review and Meta-Analyses                                                                                                                                    | 1 | X |   |   |  | 2 |
| Impact of a dental care program on the quality of life of children with and without caries                                                                                                                          | 1 | X |   |   |  | 2 |
| Impact of Atraumatic Restorative Treatment (ART) on the treatment profile in pilot government dental clinics in Tanzania                                                                                            | 1 |   |   |   |  | 1 |
| Impact of caries and dental fluorosis on oral health-related quality of life: a cross-sectional study in schoolchildren receiving water naturally fluoridated at above-optimal levels                               | 1 | X |   |   |  | 2 |
| Impact of Health Promotion Interventions on Early Childhood Caries Prevention in Children Aged 2-5 Years Receiving Dental Treatment Under General Anesthesia                                                        | 1 |   |   | X |  | 2 |
| Impact of the national program More Smiles for Chile on women's quality of life                                                                                                                                     | 1 |   |   | X |  | 2 |
| Impact of the radiographic examination on diagnosis and treatment decision of caries lesions in primary teeth--the Caries Detection in Children (CARDEC-01) trial: study protocol for a randomized controlled trial | 1 | X |   |   |  | 2 |
| Impacto do Tratamento Restaurador Atraumático nos parâmetros de saúde oral: estudo longitudinal de 24 meses/ Impact of Atraumatic Restorative Treatment in Oral health status: an evaluation of 24 months           | 1 |   | X |   |  | 2 |
| Implementation of a Basic Package of Oral Care: towards a reorientation of dental Ngos and their volunteers                                                                                                         | 1 |   | X |   |  | 2 |
| Implementation of the ART approach in South Africa: an activity report                                                                                                                                              | 1 |   |   |   |  | 1 |

|                                                                                                                                                                                                                                                                                            |   |   |   |   |  |   |
|--------------------------------------------------------------------------------------------------------------------------------------------------------------------------------------------------------------------------------------------------------------------------------------------|---|---|---|---|--|---|
| Improving access to dental care for vulnerable children                                                                                                                                                                                                                                    | 1 |   | X |   |  | 2 |
| Improving Child Oral Health: Cost Analysis of a National Nursery Toothbrushing Programme                                                                                                                                                                                                   | 1 |   |   | X |  | 2 |
| Improving the dental fitness of the British Army by changing the strategy for dental care provision for recruits from a vertically equitable model to a horizontally equitable model                                                                                                       | 1 | X |   |   |  | 2 |
| Improving the provision of the Basic Package of Oral Care (BPOC) in Cambodia                                                                                                                                                                                                               | 1 |   |   |   |  | 1 |
| Incidence of dental caries in primary dentition and risk factors: a longitudinal study                                                                                                                                                                                                     | 1 | X |   |   |  | 2 |
| Incorporação da técnica de restauração atraumática por equipes de saúde bucal da atenção básica à saúde do Recife/PE/ Incorporation of the atraumatic restoration technique by oral health teams from the basic health care of Recife/PE                                                   | 1 |   | X |   |  | 2 |
| Increased prevalence of dental caries and poor oral hygiene in juvenile idiopathic arthritis                                                                                                                                                                                               | 1 | X |   |   |  | 2 |
| Increasing access to oral healthcare for marriage-immigrant women in South Korea: programme design to policy recommendation                                                                                                                                                                | 1 |   |   | X |  | 2 |
| Increasing inequalities in the distribution of dental caries in the Brazilian context in Finland                                                                                                                                                                                           | 1 | X |   |   |  | 2 |
| Index of clinical consequences of untreated dental caries (pufa) in primary dentition of children from north-east Poland                                                                                                                                                                   | 1 | X |   |   |  | 2 |
| Indigenous Australian dental health: a brief review of caries experience                                                                                                                                                                                                                   | 1 | X |   |   |  | 2 |
| Indirect pulp therapy for deciduous teeth with deep caries lesions].                                                                                                                                                                                                                       | 1 | X |   |   |  | 2 |
| Influence of a preventive program on the oral health-related quality of life (OHRQoL) of European pregnant women: a cohort study                                                                                                                                                           | 1 |   |   | X |  | 2 |
| Inhibition of Residual Cariogenic Bacteria in Atraumatic Restorative Treatment by Chlorhexidine: Disinfection or Incorporation                                                                                                                                                             | 1 | X |   |   |  | 2 |
| Introduction of the ART approach in Egypt: intentions, clinical effects and perceived barriers. A cohort study                                                                                                                                                                             | 1 |   |   |   |  | 1 |
| Introduction to the symposium on minimal intervention techniques for caries                                                                                                                                                                                                                | 1 | X |   |   |  | 2 |
| Introduction to the symposium: Two decades of ART: success through research                                                                                                                                                                                                                | 1 | X |   |   |  | 2 |
| Investigação sobre o uso e eficácia do diamino fluoreto de prata através de uma pesquisa de opinião e de um ensaio clínico controlado e randomizado/ Investigation on the use and effectiveness of Silver Diamino Fluoride through a research of opinion and a Randomized Controlled Trial | 1 | X |   |   |  | 2 |
| Issues in the treatment of root caries in older adults                                                                                                                                                                                                                                     | 1 | X |   |   |  | 2 |
| Longitudinal evaluation of the impact of dental caries treatment on oral health-related quality of life among schoolchildren                                                                                                                                                               | 1 | X |   |   |  | 2 |
| Longitudinal Follow-up Survey of Effects of Oral Comprehensive Healthcare Measures on Early Childhood Caries                                                                                                                                                                               | 1 | X |   |   |  | 2 |
| Longitudinal study of dental caries, tooth mortality and interproximal bone loss in adults with intellectual disability                                                                                                                                                                    | 1 | X |   |   |  | 2 |
| MANAGEMENT OF DENTAL CARIES WITH ATRAUMATIC RESTORATIVE TREATMENT UNDER FIELD CONDITION IN PRIMARY SCHOOLS IN OYO STATE                                                                                                                                                                    | 1 |   | X |   |  | 2 |
| Managing caries in virtual dental homes using interim therapeutic restorations                                                                                                                                                                                                             | 1 | X |   |   |  | 2 |
| Managing dental caries in children in Turkey--a discussion paper.                                                                                                                                                                                                                          | 1 | X |   |   |  | 2 |
| Managing Early Childhood Caries for Young Children in China                                                                                                                                                                                                                                | 1 | X |   |   |  | 2 |
| Many voices, one song': a model for an oral health programme as a first step in establishing a health promoting school                                                                                                                                                                     | 1 | X |   |   |  | 2 |
| Maternal Dental Anxiety and its Effect on Caries Experience Among Children in Udaipur, India                                                                                                                                                                                               | 1 | X |   |   |  | 2 |

|                                                                                                                                                                                                           |   |   |  |   |  |   |
|-----------------------------------------------------------------------------------------------------------------------------------------------------------------------------------------------------------|---|---|--|---|--|---|
| Maternal knowledge on early childhood caries and barriers to seek dental treatment in Jordan                                                                                                              | 1 | X |  |   |  | 2 |
| MI" caries management--an overview                                                                                                                                                                        | 1 | X |  |   |  | 2 |
| Minimal intervention dentistry for partially dentate older adults                                                                                                                                         | 1 | X |  |   |  | 2 |
| Minimal intervention dentistry: part 3. Paediatric dental care--prevention and management protocols using caries risk assessment for infants and young children                                           | 1 | X |  |   |  | 2 |
| Minimally Invasive Dentistry Based on Atraumatic Restorative Treatment to Manage Early Childhood Caries in Rural and Remote Aboriginal Communities: Protocol for a Randomized Controlled Trial            | 1 | X |  |   |  | 2 |
| Minimum intervention dentistry approach to managing early childhood caries: a randomized control trial                                                                                                    | 1 | X |  |   |  | 2 |
| Minimum intervention oral healthcare for people with dental phobia: a patient management pathway                                                                                                          | 1 | X |  |   |  | 2 |
| National oral health survey on refugees in Germany 2016/2017: caries and subsequent complications                                                                                                         | 1 | X |  |   |  | 2 |
| NHS Dentistry: Options for Change in context--a personal overview of a landmark document and what it could mean for the future of dental services                                                         | 1 | X |  |   |  | 2 |
| O tratamento restaurador atraumático no contexto do Sistema Único de Saúde/ Atraumatic restorative treatment regarding the context of Sistema Único de Saúde                                              | 1 | X |  |   |  | 2 |
| One-year evaluation of atraumatic restorative treatment and minimum intervention techniques on primary teeth                                                                                              | 1 | X |  |   |  | 2 |
| Opportunities in oral health policy for Timor-Leste.                                                                                                                                                      | 1 |   |  |   |  | 1 |
| Oral health and oral health-related habits of Finnish prisoners                                                                                                                                           | 1 |   |  | X |  | 2 |
| Oral Health Challenges in Refugees from the Middle East and Africa: A Comparative Study                                                                                                                   | 1 |   |  | X |  | 2 |
| Oral health of low income children: Procedures for Atraumatic Restorative Treatment (PRAT): Final report                                                                                                  | 1 | X |  |   |  | 2 |
| Oral health of young children in Mississippi Delta child care centers: a second look at early childhood caries risk assessment                                                                            | 1 |   |  | X |  | 2 |
| Oral health promotion for children with disabilities in the Republic of Ireland: independent qualitative evaluation of a multi-sectoral oral health promotion intervention for children with disabilities | 1 |   |  | X |  | 2 |
| Oral health service systems in Gauteng Province, South Africa                                                                                                                                             | 1 |   |  | X |  | 2 |
| Oral Health Status and Oral Health Care Model in China                                                                                                                                                    | 1 | X |  |   |  | 2 |
| Oral Health Status of Stroke Patients Related to Residual Symptoms: A Case-Control Epidemiological Study in Hungary                                                                                       | 1 |   |  | X |  | 2 |
| Oral health-related quality of life following dental treatment under general anaesthesia for early childhood caries - a UK-based study                                                                    | 1 |   |  | X |  | 2 |
| Oral Health-Related Quality of Life in Preschool Children After Silver Diamine Fluoride Versus Atraumatic Restorative Treatments                                                                          | 1 | X |  |   |  | 2 |
| Out-of-pocket health expenditure in a population covered by the Family Health Program in Brazil                                                                                                           | 1 |   |  | X |  | 2 |
| Pain related to different ways of minimal intervention in the treatment of small caries lesions                                                                                                           | 1 | X |  |   |  | 2 |
| Parental factors in early childhood are associated with approximal caries experience in young adults-A longitudinal study                                                                                 | 1 | X |  |   |  | 2 |
| Parental perceptions of the Children In Need Of Treatment dental program                                                                                                                                  | 1 | X |  |   |  | 2 |
| Partial removal of carious dentine: a multicenter randomized controlled trial and 18-month follow-up results                                                                                              | 1 | X |  |   |  | 2 |
| Patient-reported negative experiences related to caries and its treatment among Swedish adult patients                                                                                                    | 1 | X |  |   |  | 2 |
| Patterns of care and service use amongst children in England, Wales and Northern Ireland 2013                                                                                                             | 1 |   |  | X |  | 2 |

|                                                                                                                                                                                                                                                           |   |   |   |   |  |   |
|-----------------------------------------------------------------------------------------------------------------------------------------------------------------------------------------------------------------------------------------------------------|---|---|---|---|--|---|
| Pediatric oral health-related quality of life improvement after treatment of early childhood caries: a prospective multisite study                                                                                                                        | 1 | X |   |   |  | 2 |
| Pediatricians' view on early childhood caries and oral health in a north region of India: A cross-sectional study                                                                                                                                         | 1 | X |   |   |  | 2 |
| Performance of atraumatic restorative treatment (ART) depending on operator-experience                                                                                                                                                                    | 1 |   | X |   |  | 2 |
| Predicting the experience of dentinal caries or restorative dental treatment in adolescents using D1 and D3 visual caries assessments                                                                                                                     | 1 | X |   |   |  | 2 |
| Prenatal Oral Health Care and Early Childhood Caries Prevention: A Systematic Review and Meta-Analysis                                                                                                                                                    | 1 | X |   |   |  | 2 |
| Prevalence and factors related to dental caries among pre-school children of Saddar town, Karachi, Pakistan: a cross-sectional study                                                                                                                      | 1 | X |   |   |  | 2 |
| Prevalence and severity of dental caries among pensioners in Benin City                                                                                                                                                                                   | 1 | X |   |   |  | 2 |
| Prevalence and severity of dental caries and treatment needs in small Brazilian counties]                                                                                                                                                                 | 1 | X |   |   |  | 2 |
| Prevalence of caries in 6-year-old Austrian children                                                                                                                                                                                                      | 1 | X |   |   |  | 2 |
| Prevalence of dental caries and treatment needs in the rural child population of Nainital District, Uttaranchal                                                                                                                                           | 1 | X |   |   |  | 2 |
| Prevalence of dental caries and treatment needs in the school-going children of rural areas in Udaipur district                                                                                                                                           | 1 | X |   |   |  | 2 |
| Prevalence of Dental Caries and Treatment Needs in Tibetan Monks and Nuns in Karnataka                                                                                                                                                                    | 1 | X |   |   |  | 2 |
| Prevalence of dental caries in schoolchildren in the rural area of Itapetininga, São Paulo State, Brazil]                                                                                                                                                 | 1 | X |   |   |  | 2 |
| Prevalence of dental caries, oral health awareness and treatment-seeking behavior of elderly population in rural Maharashtra                                                                                                                              | 1 | X |   |   |  | 2 |
| Prevalence of early childhood caries in 4 Manitoba communities                                                                                                                                                                                            | 1 | X |   |   |  | 2 |
| Preventing Advanced Carious Lesions with Caries Atraumatic Restorative Technique.                                                                                                                                                                         | 1 | X |   |   |  | 2 |
| Prevention of Dental Caries in Nigeria: A Narrative Review of Strategies and Recommendations from 1999 to 2019                                                                                                                                            | 1 | X |   |   |  | 2 |
| Preventive aspects in children's caries treatments preceding dental care under general anaesthesia                                                                                                                                                        | 1 | X |   |   |  | 2 |
| Primary oral health care: a missing link in public health in Pakistan.                                                                                                                                                                                    | 1 | X |   |   |  | 2 |
| Priorities in oral health care in non-EME countries.                                                                                                                                                                                                      | 1 |   |   | X |  | 2 |
| Process evaluation of the midwifery initiated oral health-dental service program: Perceptions of dental professionals                                                                                                                                     | 1 |   | X |   |  | 2 |
| Profile of public dental care for children and adolescents in São Luís, Maranhão State]                                                                                                                                                                   | 1 | X |   |   |  | 2 |
| Programa de saúde bucal domiciliar para crianças e adolescentes com paralisia cerebral/ Oral health home program for children and teenagers with cerebral palsy                                                                                           | 1 |   |   | X |  | 2 |
| Programas de salud implementados en centro educativos preescolares integrando el tratamiento restaurativo atraumático (ART)/ Oral Health programs for preschool children using Atraumatic Restorative Treatment ART)                                      | 1 |   | X |   |  | 2 |
| Projections Of Dental Care Use Through 2026: Preventive Care To Increase While Treatment Will Decline                                                                                                                                                     | 1 | X |   |   |  | 2 |
| Promoção de saúde bucal através de um Programa Educativo-preventivo-curativo utilizando a Técnica Restauradora Atraumática (ART)/ Promoting oral health trough an Educational Preventive Healing Program using the Atraumatic Restorative Treatment (ART) | 1 |   | X |   |  | 2 |
| Prosthetic rehabilitation in a four-year-old child with severe early childhood caries: a case report                                                                                                                                                      | 1 | X |   |   |  | 2 |

|                                                                                                                                                                                                                           |   |   |   |   |   |   |
|---------------------------------------------------------------------------------------------------------------------------------------------------------------------------------------------------------------------------|---|---|---|---|---|---|
| Protocol for a Randomised controlled trial to Evaluate the effectiveness and cost benefit of prescribing high dose FLuoride toothpaste in preventing and treating dEntal Caries in high-risk older aduLTs (reflect trial) | 1 | X |   |   |   | 2 |
| Provision of Oral Health Care to Children under Seven Covered by Bolsa Família Program. Is This a Reality?                                                                                                                | 1 |   |   | X |   | 2 |
| Public programs, insurance, and dental access                                                                                                                                                                             | 1 |   |   | X |   | 2 |
| Quality Improvement Efforts in Pediatric Oral Health.                                                                                                                                                                     | 1 | X |   |   |   | 2 |
| Randomized Controlled Trial of Class II ART High-viscosity Glass-ionomer Cement and Conventional Resin-composite restorations in Permanent Dentition: Two-year Survival                                                   | 1 | X |   |   |   | 2 |
| Reduced salivary flow and caries status are correlated with disease activity and severity in patients with diffuse cutaneous systemic sclerosis                                                                           | 1 | X |   |   |   | 2 |
| Reducing carious lesions during the first 4 years of life: An interprofessional approach                                                                                                                                  | 1 | X |   |   |   | 2 |
| Reducing Potentially Preventable Dental Hospitalizations of Young Children: A Community-Level Analysis                                                                                                                    | 1 |   |   | X |   | 2 |
| Replacing amalgam with a high-viscosity glass-ionomer in restoring primary teeth: A cost-effectiveness study in Brasília, Brazil                                                                                          | 1 | X |   |   |   | 2 |
| Republic of the Marshall Islands: planning and implementation of a dental caries prevention program for an island nation                                                                                                  | 1 | X |   |   |   | 2 |
| Research proposal: evaluation of the ART approach in elderly patients                                                                                                                                                     | 1 | X |   |   |   | 2 |
| Research proposal: quantitative and qualitative evaluation of the ART in infants                                                                                                                                          | 1 | X |   |   |   | 2 |
| Responsiveness and sensitivity of the Early Childhood Oral Health Impact Scale to primary dental care for early childhood caries                                                                                          | 1 | X |   |   |   | 2 |
| Responsiveness to change of the Malay-ECOHIS following treatment of early childhood caries under general anaesthesia                                                                                                      | 1 | X |   |   |   | 2 |
| Restauración atraumática para el control de la caries dental: historia                                                                                                                                                    | 1 |   |   |   | X | 2 |
| Risky business: setting public health policy for HIV-infected health care professionals                                                                                                                                   | 1 |   |   | X |   | 2 |
| Role of saliva in the caries experience and calculus formation of young patients undergoing hemodialysis                                                                                                                  | 1 | X |   |   |   | 2 |
| Root Caries in Older Adults.                                                                                                                                                                                              | 1 | X |   |   |   | 2 |
| Root lesions in a group of 50-60 year-old Germans related to clinical and social factors                                                                                                                                  | 1 | X |   |   |   | 2 |
| Rubber dam may increase the survival time of dental restorations.                                                                                                                                                         | 1 | X |   |   |   | 2 |
| Salivary interleukin-6 levels in children with early childhood caries and ventricular septal defect                                                                                                                       | 1 | X |   |   |   | 2 |
| Saúde Bucal no Âmbito Escolar e Familiar: da Autonomia à Transformação Social/ Oral Health in the School and Family: Autonomy of Social Change                                                                            | 1 |   | X |   |   | 2 |
| School absence due to toothache associated with sociodemographic factors, dental caries status, and oral health-related quality of life in 12- and 15-year-old Thai children                                              | 1 | X |   |   |   | 2 |
| Selective carious tissue removal using subjective criteria or polymer bur: study protocol for a randomised controlled trial (SelecCT).                                                                                    | 1 | X |   |   |   | 2 |
| Situational analysis of dental caries and existing oral health care of children and adolescents in Hubei Province, People's Republic of China: implications for change                                                    | 1 | X |   |   |   | 2 |
| Six-year follow up of atraumatic restorative treatment restorations placed in Chinese school children                                                                                                                     | 1 |   | X |   |   | 2 |
| Social aspects of dental caries in the context of mother-child pairs                                                                                                                                                      | 1 | X |   |   |   | 2 |
| Social inequality in oral health and use of dental care in Sweden                                                                                                                                                         | 1 |   |   | X |   | 2 |

|                                                                                                                                                                                                                                                                                                                                                                                                                                                                    |   |   |   |   |   |   |
|--------------------------------------------------------------------------------------------------------------------------------------------------------------------------------------------------------------------------------------------------------------------------------------------------------------------------------------------------------------------------------------------------------------------------------------------------------------------|---|---|---|---|---|---|
| Socio-economic Status, Needs, and Utilization of Dental Services among Rural Adults in a Primary Health Center Area in Southern India                                                                                                                                                                                                                                                                                                                              | 1 |   |   | X |   | 2 |
| Sociodemographic differences in oral health-related quality of life related to dental caries in thai school children                                                                                                                                                                                                                                                                                                                                               | 1 | X |   |   |   | 2 |
| Socioeconomic and family influences on dental treatment needs among Brazilian underprivileged schoolchildren participating in a dental health program                                                                                                                                                                                                                                                                                                              | 1 |   |   | X |   | 2 |
| Socioeconomic inequalities in caries experience, care level and dental attendance in primary school children in Belgium: a cross-sectional survey                                                                                                                                                                                                                                                                                                                  | 1 | X |   |   |   | 2 |
| Stability of fluoride levels in surface layer of normal enamel during a 21-month fluoride mouthrinsing program                                                                                                                                                                                                                                                                                                                                                     | 1 | X |   |   |   | 2 |
| Strategies and approaches in oral disease prevention and health promotion                                                                                                                                                                                                                                                                                                                                                                                          | 1 | X |   |   |   | 2 |
| Student dental health program of the University of Alabama in Birmingham. I. The influence of dental treatment on DMF rates                                                                                                                                                                                                                                                                                                                                        | 1 | X |   |   |   | 2 |
| Study protocol for a diagnostic randomized clinical trial to evaluate the effect of the use of two clinical criteria in the assessment of caries lesions around restorations in adults: the Caries Cognition and Identification in Adults (CaCIA) trial                                                                                                                                                                                                            | 1 | X |   |   |   | 2 |
| Subjective impact of minimally invasive dentistry in the oral health of older patients.                                                                                                                                                                                                                                                                                                                                                                            | 1 | X |   |   |   | 2 |
| Success rates of manual restorative treatment (MRT) with amalgam in permanent teeth in high caries-risk Filipino children.                                                                                                                                                                                                                                                                                                                                         | 1 | X |   |   |   | 2 |
| Suitability of ART approach for managing caries lesions in people with disability-Experts' opinion                                                                                                                                                                                                                                                                                                                                                                 | 1 | X |   |   |   | 2 |
| Survey and analysis of dental caries in students at a deaf-mute high school                                                                                                                                                                                                                                                                                                                                                                                        | 1 | X |   |   |   | 2 |
| Survival of Fuji IX ART fillings in permanent teeth of primary school children in Tanzania                                                                                                                                                                                                                                                                                                                                                                         | 1 | X |   |   |   | 2 |
| Survival rates of two atraumatic restorative treatment (ART) types in occlusal carious permanent teeth after two years                                                                                                                                                                                                                                                                                                                                             | 1 | X |   |   |   | 2 |
| System dynamics modeling for tooth decay treatment in Brazilian children.                                                                                                                                                                                                                                                                                                                                                                                          | 1 |   | X |   |   | 2 |
| Teaching atraumatic restorative treatment in U.S. dental schools: a survey of predoctoral pediatric dentistry program directors                                                                                                                                                                                                                                                                                                                                    | 1 | X |   |   |   | 2 |
| Técnica do tratamento restaurador atraumatico em estudantes de escola municipal do Rio de Janeiro: avaliação in vitro da influência da proteção superficial e do tempo de entrada em serviço na resistência a tração diametral do cimento de ionômero de vidro utilizado/ Atraumatic restorative treatment realized in schoolchildren in municipal school -RJ – Brazil: in vitro evaluated of cohesive resistance and diametral traction of the glass ionomer used | 1 | X |   |   |   | 2 |
| Ten-year survival of ART restorations in permanent posterior teeth                                                                                                                                                                                                                                                                                                                                                                                                 | 1 | X |   |   |   | 2 |
| The ART approach using glass-ionomers in relation to global oral health care                                                                                                                                                                                                                                                                                                                                                                                       | 1 |   |   |   | X | 2 |
| The association between caries related treatment needs and socio-demographic variables among young Israeli adults: a record based cross sectional study                                                                                                                                                                                                                                                                                                            | 1 | X |   |   |   | 2 |
| The Atraumatic Restorative Treatment (ART) approach can improve oral health for the elderly; myth or reality?                                                                                                                                                                                                                                                                                                                                                      | 1 | X |   |   |   | 2 |
| The atraumatic restorative treatment (ART) strategy in Mexico: two-years follow up of ART sealants and restorations                                                                                                                                                                                                                                                                                                                                                | 1 |   |   |   |   | 1 |
| The Augsburg cooperation model for promoting dental health in childhood]                                                                                                                                                                                                                                                                                                                                                                                           | 1 | X |   |   |   | 2 |
| The burden of restorative dental treatment for children in Third World countries                                                                                                                                                                                                                                                                                                                                                                                   | 1 |   |   | X |   | 2 |

|                                                                                                                                                                                  |   |   |   |   |  |   |
|----------------------------------------------------------------------------------------------------------------------------------------------------------------------------------|---|---|---|---|--|---|
| The caries experience and behavior of dental patients with autism spectrum disorder                                                                                              | 1 | X |   |   |  | 2 |
| The Community Dental Facilitator Project: reducing barriers to dental care                                                                                                       | 1 | X |   |   |  | 2 |
| The contemporary approach to tooth preservation: minimum intervention (MI) caries management in general practice.                                                                | 1 | X |   |   |  | 2 |
| The development and practice of social dentistry in Germany                                                                                                                      | 1 |   |   | X |  | 2 |
| The development, implementation, utilization and outcomes of a comprehensive dental program for older adults residing in long-term care facilities                               | 1 |   |   | X |  | 2 |
| The Effect of a Personalized Oral Health Education Program on Periodontal Health in an At-Risk Population: A Randomized Controlled Trial                                         | 1 |   |   | X |  | 2 |
| The effect of different dental treatment strategies on the oral health of children: a longitudinal randomised controlled trial                                                   | 1 | X |   |   |  | 2 |
| The estimated cost of treating unmet dental restorative needs of Mexican-American children from Southwestern US HHANES, 1982-83                                                  | 1 | X |   |   |  | 2 |
| The history and scientific development of atraumatic restorative treatment]                                                                                                      | 1 | X |   |   |  | 2 |
| The impact of an oral health program on domestic violence survivors within community shelters                                                                                    | 1 |   |   | X |  | 2 |
| The impact of dental caries and its treatment by conventional or biological approaches on the oral health-related quality of life of children and carers                         | 1 | X |   |   |  | 2 |
| The impact of the ART approach on the treatment profile in a mobile dental system (MDS) in South Africa                                                                          | 1 |   | X |   |  | 2 |
| The impact of the Great Recession on untreated dental caries among kindergarten students in North Carolina                                                                       | 1 | X |   |   |  | 2 |
| The implementation and preliminary evaluation of an ART strategy in Mexico: a country example                                                                                    | 1 |   |   |   |  | 1 |
| The influence of an oral health education program provided in a community dental clinic on the prevalence of caries among 12-14 year-old children                                | 1 |   | X |   |  | 2 |
| The Interprofessional Role in Dental Caries Management: From the Social Worker Perspective                                                                                       | 1 | X |   |   |  | 2 |
| The long-term effect of a plaque control program on tooth mortality, caries and periodontal disease in adults. Results after 30 years of maintenance                             | 1 |   |   | X |  | 2 |
| The opinion of children and their parents about four different types of dental restorations in a public health service in Brazil                                                 | 1 |   | X |   |  | 2 |
| The oral health status and treatment needs of Indigenous adults in the Kimberley region of Western Australia                                                                     | 1 |   |   | X |  | 2 |
| The Oral Healthcare System in Japan                                                                                                                                              | 1 |   |   | X |  | 2 |
| The policy and role of government in community dental health care in the twenty-first century]                                                                                   | 1 |   |   | X |  | 2 |
| The prevalence and treatment of dental caries among Israeli permanent force military personnel                                                                                   | 1 | X |   |   |  | 2 |
| The prevalence of caries and tooth loss among participants in the Hispanic Community Health Study/Study of Latinos                                                               | 1 | X |   |   |  | 2 |
| The prevalence of caries in marginal rural and peripheral urban areas]                                                                                                           | 1 | X |   |   |  | 2 |
| The relationship between children's dental caries experience and the prescription of general anaesthetics. an evaluation of the effectiveness of a Personal Dental Service Pilot | 1 | X |   |   |  | 2 |
| The state of oral and dental health of the homeless and vagrant population of Montreal                                                                                           | 1 |   |   | X |  | 2 |

|                                                                                                                                                                                                                                                                              |   |   |   |   |   |   |
|------------------------------------------------------------------------------------------------------------------------------------------------------------------------------------------------------------------------------------------------------------------------------|---|---|---|---|---|---|
| The uptake and completion of dental treatment using a mobile clinic in central Birmingham, UK                                                                                                                                                                                | 1 |   | X |   |   | 2 |
| The willingness of US pediatric dentists to use atraumatic restorative treatment (ART) with their patients: a conjoint analysis                                                                                                                                              | 1 | X |   |   |   | 2 |
| Three-year survival of ART high-viscosity glass-ionomer and resin composite restorations in people with disability                                                                                                                                                           | 1 | X |   |   |   | 2 |
| Three-year survival of one-surface ART restorations and glass-ionomer sealants in a school oral health programme in Zimbabwe                                                                                                                                                 | 1 |   |   |   |   | 1 |
| Three-year survival of single- and two-surface ART restorations in a high-caries child population                                                                                                                                                                            | 1 |   | X |   |   | 2 |
| Tooth loss and dental caries in institutionalized elderly in Italy                                                                                                                                                                                                           | 1 | X |   |   |   | 2 |
| Towards an empowerment approach in tuberculosis treatment in Cape Town, South Africa: a qualitative analysis of programmatic change                                                                                                                                          | 1 |   |   | X |   | 2 |
| Transferring ART research into education in Brazil                                                                                                                                                                                                                           | 1 | X |   |   |   | 2 |
| Tratamento Restaurador Atraumático (TRA) e sua aplicabilidade em comunidades menos assistidas/ Atraumatic Restorative Treatment (ART) and their applicability in less assisted communities                                                                                   | 1 | X |   |   |   | 2 |
| Tratamento restaurador atraumático (TRA): avaliação em creches municipais do Rio de Janeiro/ Atraumatic restorative treatment (ART): evaluation in Municipal Day Cares of Rio de Janeiro                                                                                     | 1 |   | X |   |   | 2 |
| Tratamento restaurador atraumático associado a medidas preventivas na saúde pública brasileira                                                                                                                                                                               | 1 | X |   |   |   | 2 |
| Tratamento restaurador atraumático como prática exequível do controle da cárie em saúde pública                                                                                                                                                                              | 1 | X |   |   |   | 2 |
| Tratamento restaurador atraumático como proposta para ampliação de cobertura e a importância do técnico em saúde bucal nesta prática/ Atraumatic restorative treatment as a proposal for expansion of coverage and the importance of oral health technician in this practice | 1 |   | X |   |   | 2 |
| Tratamento restaurador atraumático e sua utilização em saúde pública/ Atraumatic restorative treatment and its use in public health dentistry                                                                                                                                | 1 | X |   |   |   | 2 |
| Tratamento restaurador atraumático no controle da cárie em escolares do município de Sarzedo - MG: uma proposta de intervenção                                                                                                                                               | 1 |   | X |   |   | 2 |
| Tratamento restaurador atraumático: conhecimentos e atitudes de cirurgiões-dentistas do serviço público de Goiânia/ Atraumatic restorative treatment: public health dentists knowledge and attitudes in Goiânia - GO                                                         | 1 | X |   |   |   | 2 |
| Tratamento restaurador atraumático: uma alternativa para o controle da cárie dentária no serviço público de saúde Bías Fortes - MG                                                                                                                                           | 1 |   | X |   |   | 2 |
| Tratamento restaurador atraumático(ART) como uma estratégia de promoção de saúde bucal na atenção básica/ Atraumatic restorative treatment (art) as a strategy for the promotion of oral health in primary care                                                              | 1 |   | X |   |   | 2 |
| Tratamiento restaurador atraumático como una herramienta de la odontología simplificada: revisión bibliográfica/ Atraumatic restorative treatment like a tool of the simplified dentistry: review                                                                            | 1 | X |   |   |   | 2 |
| Trends in the community dental service 1980-1990                                                                                                                                                                                                                             | 1 |   |   | X |   | 2 |
| Twelve-month evaluation of the atraumatic restorative treatment approach for class III restorations: An interventional study                                                                                                                                                 | 1 |   | X |   |   | 2 |
| Twenty-five-year atraumatic restorative treatment (ART) approach: a comprehensive overview.                                                                                                                                                                                  | 1 |   |   |   | X | 2 |
| Two decades of ART: improving on success through further research                                                                                                                                                                                                            | 1 | X |   |   |   | 2 |

|                                                                                                                                                                            |   |   |   |   |  |   |
|----------------------------------------------------------------------------------------------------------------------------------------------------------------------------|---|---|---|---|--|---|
| Undergraduate training in the atraumatic restorative treatment (ART) approach--an activity report                                                                          | 1 |   | X |   |  | 2 |
| Understanding Pediatric Dentists' Dental Caries Management Treatment Decisions: A Conjoint Experiment                                                                      | 1 | X |   |   |  | 2 |
| USAF dental readiness classifications and caries-risk assessment                                                                                                           | 1 | X |   |   |  | 2 |
| Use of the ART technique within the school setting can be a practical and effective method of treating caries among large populations of underserved children              | 1 |   | X |   |  | 2 |
| Uso de seringas para inserção no ART: ensaio clínico randomizado/ Use of syringes for insertion in ART: randomized clinical trial                                          | 1 | X |   |   |  | 2 |
| Uso do tratamento restaurador atraumático na Estratégia Saúde da Família/ The use of atraumatic restorative treatment in the Family Health Strategy                        | 1 | X |   |   |  | 2 |
| Utilisation of Oral Health Services and Economic Burden of Oral Diseases in China                                                                                          | 1 |   |   | X |  | 2 |
| Utilization of dental health services by community-dwelling older adults in Japan who attended a weekly educational programme                                              | 1 |   |   | X |  | 2 |
| Utilization of the ART approach in a group of public oral health operators in South Africa: a 5-year longitudinal study                                                    | 1 |   |   |   |  | 1 |
| Variations in caries diagnoses and treatment recommendations and their impacts on the costs of oral health care                                                            | 1 | X |   |   |  | 2 |
| Views of pregnant women in South Western Sydney towards dental care and an oral-health program initiated by midwives                                                       | 1 |   |   | X |  | 2 |
| Views on oral health care strategies.                                                                                                                                      | 1 | X |   |   |  | 2 |
| Vital Signs: Dental Sealant Use and Untreated Tooth Decay Among U.S. School-Aged Children                                                                                  | 1 | X |   |   |  | 2 |
| Why are children still having preventable extractions under general anaesthetic? A service evaluation of the views of parents of a high caries risk group of children      | 1 |   | X |   |  | 2 |
| A case report on dental management of a toddler with Pachygyria                                                                                                            | 2 |   |   |   |  | 2 |
| A Case Report on the Effect of Sham Acupuncture                                                                                                                            | 2 |   |   |   |  | 2 |
| A clinical evaluation of resin-based composite and glass ionomer cement restorations placed in primary teeth using the ART approach: results at 24 months                  | 2 |   |   |   |  | 2 |
| A clinician guide to patients afraid of dental injections and numbness                                                                                                     | 2 |   |   |   |  | 2 |
| A comparative evaluation of oral hygiene practices, oral health status, and behavior between graduate and post-graduate dentists of North India: An epidemiological survey | 2 |   |   |   |  | 2 |
| A Comparative Study of Oral Health Status between International and Japanese University Student Patients in Japan                                                          | 2 |   |   |   |  | 2 |
| A comparison of medical and dental outcomes for Medicaid-insured and uninsured Medicaid-eligible children: a U.S. population-based study                                   | 2 |   |   |   |  | 2 |
| A comparison of oral health in elderly populations seeking and not seeking dental care                                                                                     | 2 |   |   |   |  | 2 |
| A comparison of self assessment of dental status regarding dental anxiety among combat and non-combat soldiers]                                                            | 2 |   |   |   |  | 2 |
| A comparison of the dental status and treatment needs of older adults with and without chronic mental illness in Sevilla, Spain                                            | 2 |   |   |   |  | 2 |
| A Comprehensive Approach Limiting Extractions under General Anesthesia Could Improve Oral Health                                                                           | 2 |   |   |   |  | 2 |
| A comprehensive evaluation of the validity of Child-OIDP: further evidence from Peru                                                                                       | 2 |   |   |   |  | 2 |
| A conceptual model of parental behavior change following a child's dental general anesthesia procedure                                                                     | 2 |   |   |   |  | 2 |
| A cost-efficiency analysis of a mobile dental clinic in the public services                                                                                                | 2 |   |   |   |  | 2 |

|                                                                                                                                                                                                          |   |  |  |  |  |   |
|----------------------------------------------------------------------------------------------------------------------------------------------------------------------------------------------------------|---|--|--|--|--|---|
| A critique of recent economic evaluations of community water fluoridation                                                                                                                                | 2 |  |  |  |  | 2 |
| A cross sectional study of Mexican caregiver social status, dental knowledge, self-efficacy, and caregiver/child oral health. A structural equation model                                                | 2 |  |  |  |  | 2 |
| A Cross-Sectional Analysis of Dental Care Utilization Among Pregnant Women in Saudi Arabia                                                                                                               | 2 |  |  |  |  | 2 |
| A cross-sectional analysis of the prevalence of dental anxiety and its relation to the oral health-related quality of life in patients with dental treatment needs at a university clinic in Switzerland | 2 |  |  |  |  | 2 |
| A cross-sectional study of perceived dental treatment needs and oral health status in community-dwelling older Australian men: The Concord Health and Ageing in Men Project                              | 2 |  |  |  |  | 2 |
| A Cross-sectional Study to assess the Perception of Psychosocial Elements among Pediatric Patients visiting Dental Clinics                                                                               | 2 |  |  |  |  | 2 |
| A dental phobia treatment within the Swedish National Health Insurance                                                                                                                                   | 2 |  |  |  |  | 2 |
| A Framework for Equity Access to Primary Dental Care                                                                                                                                                     | 2 |  |  |  |  | 2 |
| A global approach to assess the economic benefits of increased consumption of sugar-free chewing gum                                                                                                     | 2 |  |  |  |  | 2 |
| A joint approach to treating dental phobia: a re-evaluation of a collaboration between community dental services and specialist psychotherapy services ten years on                                      | 2 |  |  |  |  | 2 |
| A joint approach to treating dental phobics between community dental services and specialist psychotherapy services--a single case report                                                                | 2 |  |  |  |  | 2 |
| A localised oral health study based on the School Dental Inspection system, and its implications for the proposed national oral health database                                                          | 2 |  |  |  |  | 2 |
| A longitudinal evaluation of fissure sealants applied in dental practices                                                                                                                                | 2 |  |  |  |  | 2 |
| A longitudinal study of dental health in Swedish children aged 3-5 years                                                                                                                                 | 2 |  |  |  |  | 2 |
| A longitudinal study of quality of life of elderly with mandibular implant-supported fixed prostheses                                                                                                    | 2 |  |  |  |  | 2 |
| A Malay version of the Child Oral Impacts on Daily Performances (Child-OIDP) index: assessing validity and reliability                                                                                   | 2 |  |  |  |  | 2 |
| A multi-country comparison of reasons for dental non-attendance                                                                                                                                          | 2 |  |  |  |  | 2 |
| A multilevel analysis of factors affecting the difference in dental patients' and caregivers' evaluation of oral quality of life                                                                         | 2 |  |  |  |  | 2 |
| A new classification system for dental treatment under general anesthesia                                                                                                                                | 2 |  |  |  |  | 2 |
| A new, short, specific questionnaire (QoLIP-10) for evaluating the oral health-related quality of life of implant-retained overdenture and hybrid prosthesis wearers                                     | 2 |  |  |  |  | 2 |
| A Novel Mobile App Intervention to Reduce Dental Anxiety in Infant Patients                                                                                                                              | 2 |  |  |  |  | 2 |
| A one-year follow-up of an oral health care programme for residents with severe behavioural disorders at special nursing homes in Denmark                                                                | 2 |  |  |  |  | 2 |
| A periodontist's view on the assessment of periodontal disease in the community                                                                                                                          | 2 |  |  |  |  | 2 |
| A physician's guide to coordinating oral health and primary care                                                                                                                                         | 2 |  |  |  |  | 2 |
| A pilot assessment tool of the need for oral health care and cost prediction in institutionalized elderly people                                                                                         | 2 |  |  |  |  | 2 |
| A Pilot Dental Survey on Maui                                                                                                                                                                            | 2 |  |  |  |  | 2 |
| A preliminary investigation of periodontal disease and diabetes in Trinidad                                                                                                                              | 2 |  |  |  |  | 2 |

|                                                                                                                                                                                    |   |  |  |  |  |   |
|------------------------------------------------------------------------------------------------------------------------------------------------------------------------------------|---|--|--|--|--|---|
| A psychosocial approach to dentistry for the underserved: incorporating theory into practice                                                                                       | 2 |  |  |  |  | 2 |
| A qualitative exploration of dental practitioners' knowledge, attitudes and practices towards HIV+ and patients with other 'high risk' groups                                      | 2 |  |  |  |  | 2 |
| A Qualitative Study to Assess the Impact of Iatrogenic Trigeminal Nerve Injury                                                                                                     | 2 |  |  |  |  | 2 |
| A quality assurance review of the patient referral process and user satisfaction of outpatient general anaesthesia services for dental treatment                                   | 2 |  |  |  |  | 2 |
| A reply to Mr. McKinlay's comment on "Class attitudes to dental treatment"                                                                                                         | 2 |  |  |  |  | 2 |
| A retrospective investigation of the oral health records of a cohort of preschool children who received extractions under general anaesthesia including cost analysis of treatment | 2 |  |  |  |  | 2 |
| A review of dental treatment of head and neck cancer patients, before, during and after radiotherapy: part 1                                                                       | 2 |  |  |  |  | 2 |
| A role for the family in children's oral health                                                                                                                                    | 2 |  |  |  |  | 2 |
| A school-based epidemiological study of dental neglect among adolescents in a deprived area of the UK                                                                              | 2 |  |  |  |  | 2 |
| A self-reported survey of Alzheimer's centers in Southwestern Pennsylvania                                                                                                         | 2 |  |  |  |  | 2 |
| A sociodental approach to assessing children's oral health needs: integrating an oral health-related quality of life (OHRQoL) measure into oral health service planning            | 2 |  |  |  |  | 2 |
| A sociodental approach to assessing dental needs of children: concept and models                                                                                                   | 2 |  |  |  |  | 2 |
| A socioepidemiological survey of the oral health status and needs for dental care among elderly population in China]                                                               | 2 |  |  |  |  | 2 |
| A special needs dentistry study of institutionalized individuals with intellectual disability in West Sumatra Indonesia                                                            | 2 |  |  |  |  | 2 |
| A study of the dental treatment needs of children with disabilities in Melbourne, Australia                                                                                        | 2 |  |  |  |  | 2 |
| A study of the dental treatment needs of special patients: cerebral paralysis and Down syndrome                                                                                    | 2 |  |  |  |  | 2 |
| A study of the reasons for irregular dental attendance in a private dental college in a rural setup                                                                                | 2 |  |  |  |  | 2 |
| A study on fear provoking factors in students from the town of Plovdiv                                                                                                             | 2 |  |  |  |  | 2 |
| A Survey of Dental Patient Attitudes on the Likelihood and Perceived Importance of Disclosing Daily Medications                                                                    | 2 |  |  |  |  | 2 |
| A survey of oral health in a population of adults with developmental disabilities: comparison with a national oral health survey of the general population                         | 2 |  |  |  |  | 2 |
| A system for tracking dental readiness in the Air Force Reserve                                                                                                                    | 2 |  |  |  |  | 2 |
| A systematic review of oral health outcomes produced by dental teams incorporating midlevel providers                                                                              | 2 |  |  |  |  | 2 |
| A treatment need index: a pilot study                                                                                                                                              | 2 |  |  |  |  | 2 |
| Access Barriers to Dental Health Care in Children with Disability. A Questionnaire Study of Parents                                                                                | 2 |  |  |  |  | 2 |
| Access to dental care for people with bleeding disorders: survey results of hemophilia treatment centers in the U.S                                                                | 2 |  |  |  |  | 2 |
| Access to dental care-parents' and caregivers' views on dental treatment services for people with disabilities                                                                     | 2 |  |  |  |  | 2 |
| Access to oral care before hematopoietic stem cell transplantation: understand to improve                                                                                          | 2 |  |  |  |  | 2 |
| Access to primary dental care for patients with inherited bleeding disorders                                                                                                       | 2 |  |  |  |  | 2 |

|                                                                                                                                                                |   |  |  |  |  |   |
|----------------------------------------------------------------------------------------------------------------------------------------------------------------|---|--|--|--|--|---|
| Accidental ingestion of a dental irrigation needle: a case report                                                                                              | 2 |  |  |  |  | 2 |
| Accuracy of teledentistry examinations at predicting actual treatment modality in a pediatric dentistry clinic                                                 | 2 |  |  |  |  | 2 |
| Achieving oral health in patients with renal failure and renal transplants                                                                                     | 2 |  |  |  |  | 2 |
| Adaptation and validation for Spain of the Child-Oral Impact on Daily Performance (C-OIDP) for use with adolescents                                            | 2 |  |  |  |  | 2 |
| Adaptation measures in dental care for children with history of Adverse Childhood Experiences: A practical proposal                                            | 2 |  |  |  |  | 2 |
| Adaptation of dental home care--report number 2: Attempt at a new system of dental home care]                                                                  | 2 |  |  |  |  | 2 |
| Adaptation of Oral Health Impact Profile (OHIP-14) index for measuring impact of oral health on quality of life in elderly to Serbian language]                | 2 |  |  |  |  | 2 |
| Adaptive coping strategies among adults with dental fear. Further development of a new version of the Dental Coping Strategy Questionnaire                     | 2 |  |  |  |  | 2 |
| Adherence to oral hygiene and dental self-care]                                                                                                                | 2 |  |  |  |  | 2 |
| Administration of Ratanhia-based herbal oral care products for the prophylaxis of oral mucositis in cancer chemotherapy patients: a clinical trial             | 2 |  |  |  |  | 2 |
| Adult Dental Health Survey 2009: relationships between dental attendance patterns, oral health behaviour and the current barriers to dental care               | 2 |  |  |  |  | 2 |
| Adults with intellectual disability: a mixed-methods investigation of their experiences of dental treatment under general anaesthetic                          | 2 |  |  |  |  | 2 |
| Advanced restorative dentistry - a problem for the elderly? An ethical dilemma                                                                                 | 2 |  |  |  |  | 2 |
| Aesthetic demand of French seniors: a large-scale study                                                                                                        | 2 |  |  |  |  | 2 |
| Age- and Time-Related Trends in Oral Health Care for Patients Aged 60 Years and Older in 2007-2017 in Public Oral Health Services in Helsinki, Finland         | 2 |  |  |  |  | 2 |
| Aging successfully: oral health for the prime of life                                                                                                          | 2 |  |  |  |  | 2 |
| Alzheimer's disease and oral care                                                                                                                              | 2 |  |  |  |  | 2 |
| An analysis of complaints against oral health professionals charged with misconduct at the HPCSA: 2004-2009                                                    | 2 |  |  |  |  | 2 |
| An analysis of the timing and materials associated with pulp disease following restorative dental treatment                                                    | 2 |  |  |  |  | 2 |
| An assessment of the dental health of chronic institutionalized patients with psychiatric disease in Israel                                                    | 2 |  |  |  |  | 2 |
| An Australian government dental scheme: Doctor-dentist-patient tensions in the triangle                                                                        | 2 |  |  |  |  | 2 |
| An epidemiological study on the prevalence of temporomandibular disorder and associated history and problems in Nepalese subjects                              | 2 |  |  |  |  | 2 |
| An evaluation of long-term benefits of dental treatment for dento-facial handicapped children in Colorado                                                      | 2 |  |  |  |  | 2 |
| An evaluation of the oral health quality of life (OHQoL) instrument in a Brazilian population                                                                  | 2 |  |  |  |  | 2 |
| An explorative analysis of the recruitment of patients to a randomised controlled trial in adolescents with dental anxiety                                     | 2 |  |  |  |  | 2 |
| An exploratory pilot study to assess self-perceived changes among social assistance recipients regarding employment prospects after receiving dental treatment | 2 |  |  |  |  | 2 |
| An investigation of adult attitudes to the dental treatment of children                                                                                        | 2 |  |  |  |  | 2 |
| An update on myasthenia gravis, challenging disease for the dental profession                                                                                  | 2 |  |  |  |  | 2 |

|                                                                                                                                                                                                  |   |  |  |  |  |   |
|--------------------------------------------------------------------------------------------------------------------------------------------------------------------------------------------------|---|--|--|--|--|---|
| Analysis of a payments database reveals trends in dental treatment provision                                                                                                                     | 2 |  |  |  |  | 2 |
| Anesthetic management of a patient with chromosome 6p duplication: a case report                                                                                                                 | 2 |  |  |  |  | 2 |
| Anxiety and fear of dental treatment among users of public health services                                                                                                                       | 2 |  |  |  |  | 2 |
| Anxiety in the dental office: theoretical aspects and treatment strategies]                                                                                                                      | 2 |  |  |  |  | 2 |
| Anxiety regarding dental treatment: prevalence and predictors among Brazilians]                                                                                                                  | 2 |  |  |  |  | 2 |
| Anxiety, pain and discomfort associated with dental treatment                                                                                                                                    | 2 |  |  |  |  | 2 |
| Anxiety, stress, depression, oral health status and behaviours in Romanian hemodialysis patients                                                                                                 | 2 |  |  |  |  | 2 |
| Aplicabilidade do tratamento restaurador atraumático em crianças até seis anos de idade                                                                                                          | 2 |  |  |  |  | 2 |
| Application of short-form oral health impact profile on elderly Japanese                                                                                                                         | 2 |  |  |  |  | 2 |
| Application of the perinatal oral health guidelines in clinical practice                                                                                                                         | 2 |  |  |  |  | 2 |
| Arabic version of the Geriatric Oral Health Assessment Index                                                                                                                                     | 2 |  |  |  |  | 2 |
| Are anxiety and the presence of siblings risk factors for dental neglect and oral health status in children?                                                                                     | 2 |  |  |  |  | 2 |
| As atribuições do técnico de saúde bucal: sistematização de práticas/ The attributions of the oral health technician: practice systematization                                                   | 2 |  |  |  |  | 2 |
| Aspects of planning and evaluation of children's dental care in Appalachia                                                                                                                       | 2 |  |  |  |  | 2 |
| Assessing change in quality of life and dental anxiety in young children following dental rehabilitation under general anesthesia                                                                | 2 |  |  |  |  | 2 |
| Assessing changes in oral health-related quality of life following dental rehabilitation under general anesthesia                                                                                | 2 |  |  |  |  | 2 |
| Assessing prosthodontic dental treatment needs in older adults in Thailand: normative vs. sociodental approaches                                                                                 | 2 |  |  |  |  | 2 |
| Assessing the need for anesthesia and sedation services in Kuwaiti dental practice                                                                                                               | 2 |  |  |  |  | 2 |
| Assessment and management of oral health in liver transplant candidates                                                                                                                          | 2 |  |  |  |  | 2 |
| Assessment of atmospheric microbial contamination in a mobile dental unit                                                                                                                        | 2 |  |  |  |  | 2 |
| Assessment of changes in oral health-related quality of life among patients with complete denture before and 1 month post-insertion using Geriatric Oral Health Assessment Index                 | 2 |  |  |  |  | 2 |
| Assessment of Knowledge and Attitude of Expectant Mothers Regarding Effect of Their Oral Health and Its Influence on the Infant Oral Health                                                      | 2 |  |  |  |  | 2 |
| Assessment of knowledge toward periodontal disease among a sample of nephrologists and nurses who work with chronic kidney disease not yet on dialysis                                           | 2 |  |  |  |  | 2 |
| Assessment of oral health needs and barriers to care in a Gullah community: Hollywood smiles                                                                                                     | 2 |  |  |  |  | 2 |
| Assessment of Oral Health Related Quality of Life Among Completely Edentulous Patients in Western India by Using GOHAI                                                                           | 2 |  |  |  |  | 2 |
| Assessment of Oral Health Related Quality of Life Among the Institutionalised Elderly in Delhi, India                                                                                            | 2 |  |  |  |  | 2 |
| Assessment of Oral Health Status and Dental Treatment Needs Among 12- and 15-Year-Old School-Going Children of Fisherman Community Residing at East Coast Road, Chennai: A Cross-Sectional Study | 2 |  |  |  |  | 2 |

|                                                                                                                                                                                                           |   |  |  |  |  |   |
|-----------------------------------------------------------------------------------------------------------------------------------------------------------------------------------------------------------|---|--|--|--|--|---|
| Assessment of Oral Status in Pediatric Patients with Special Health Care Needs receiving Dental Rehabilitation Procedures under General Anesthesia: A Retrospective Analysis                              | 2 |  |  |  |  | 2 |
| Assessment of Periodontal Health and Necessity of Dental Treatment in the Institutionalized Elderly Population of East Godavari District, Andhra Pradesh                                                  | 2 |  |  |  |  | 2 |
| Assessment of the oral health condition of nursing home residents by primary care nurses                                                                                                                  | 2 |  |  |  |  | 2 |
| Assessment of the use of xerogenic medications for chronic medical and dental conditions among adult day health participants                                                                              | 2 |  |  |  |  | 2 |
| Assessment of treatment provided by dental health aide therapists in Alaska: a pilot study                                                                                                                | 2 |  |  |  |  | 2 |
| Association between Anxiety and Pain in Dental Treatment: A Systematic Review and Meta-analysis                                                                                                           | 2 |  |  |  |  | 2 |
| Association between children's perceptions of the dentist and dental treatment and their oral health-related quality of life                                                                              | 2 |  |  |  |  | 2 |
| Association between cognitive vulnerability, dental fear, and oral health status among schoolchildren in Bangalore city - A cross-sectional study                                                         | 2 |  |  |  |  | 2 |
| Association between Dental Treatment, Quality of Life, and Activity Limitation According to Masticatory Discomfort: Evidence from the Korean National Health and Nutrition Examination Survey (2013-2015) | 2 |  |  |  |  | 2 |
| Association between diet, social resources and oral health related quality of life in edentulous patients                                                                                                 | 2 |  |  |  |  | 2 |
| Association between early childhood oral health impact scale (ECOHIS) scores and pediatric dental surgery wait times                                                                                      | 2 |  |  |  |  | 2 |
| Association Between Health-Related Beliefs and Oral Health Behaviors Among Uninsured Primary Care Patients                                                                                                | 2 |  |  |  |  | 2 |
| Association between oral health knowledge and practices of Saudi pregnant women in Dammam, Saudi Arabia                                                                                                   | 2 |  |  |  |  | 2 |
| Association Between Personality Traits and Oral Health-Related Quality of Life: A Cross-Sectional Study                                                                                                   | 2 |  |  |  |  | 2 |
| Association between the time after transplantation and different immunosuppressive medications with dental and periodontal treatment need in patients after solid organ transplantation                   | 2 |  |  |  |  | 2 |
| Association of dietary habits with restorative dental treatment need and BMI among Finnish conscripts: a cross-sectional epidemiological study                                                            | 2 |  |  |  |  | 2 |
| Association of interleukin-1 polymorphisms with periodontal disease                                                                                                                                       | 2 |  |  |  |  | 2 |
| Association of oral health literacy with oral health behaviors, perception, knowledge, and dental treatment related outcomes: a systematic review and meta-analysis                                       | 2 |  |  |  |  | 2 |
| Association of personality traits with oral health-related quality of life independently of objective oral health status: a study of community-dwelling elderly Japanese                                  | 2 |  |  |  |  | 2 |
| Associations between ectodermal dysplasia, psychological distress and quality of life in a group of adults with oligodontia                                                                               | 2 |  |  |  |  | 2 |
| Associations between oral health-related impacts and rate of weight gain after extraction of pulpally involved teeth in underweight preschool Filipino children                                           | 2 |  |  |  |  | 2 |
| Associations between perceived needs for dental treatment, oral health-related quality of life and oral diseases in school-aged Thai children                                                             | 2 |  |  |  |  | 2 |
| Associations between tooth loss, prostheses and self-reported oral health, general health, socioeconomic position and satisfaction with life                                                              | 2 |  |  |  |  | 2 |

|                                                                                                                                                                                                                                                                                                                                                          |   |  |  |  |  |   |
|----------------------------------------------------------------------------------------------------------------------------------------------------------------------------------------------------------------------------------------------------------------------------------------------------------------------------------------------------------|---|--|--|--|--|---|
| Atividades realizadas durante o estágio supervisionado do curso de odontologia da UEM em um centro de educação infantil/ Activities performed by dental students at a nursery school during their supervised training program/ Actividades realizadas durante la residencia supervisada de estudiantes de odontología en un centro de educación infantil | 2 |  |  |  |  | 2 |
| Attending and avoiding dental appointments: Do "bright" and "dark" motivational paths have a role?                                                                                                                                                                                                                                                       | 2 |  |  |  |  | 2 |
| Attitude/practices of oral healthcare provider to management of HIV/AIDS patients in the Pacific                                                                                                                                                                                                                                                         | 2 |  |  |  |  | 2 |
| Attitudes and behavior of HIV-infected patients concerning dental care                                                                                                                                                                                                                                                                                   | 2 |  |  |  |  | 2 |
| Attitudes and lifestyle factors in relation to oral health and dental care in Sweden: a cross-sectional study                                                                                                                                                                                                                                            | 2 |  |  |  |  | 2 |
| Attitudes to dental health and care among 20 to 25-year-old Swedes: results from a questionnaire                                                                                                                                                                                                                                                         | 2 |  |  |  |  | 2 |
| Autonomy-supportive dental treatment, oral health-related eudaimonic well-being and oral health: a randomized clinical trial                                                                                                                                                                                                                             | 2 |  |  |  |  | 2 |
| Availability of hospital dental care services under sedation or general anesthesia for individuals with special needs in the Unified Health System for the State of Minas Gerais (SUS-MG), Brazil                                                                                                                                                        | 2 |  |  |  |  | 2 |
| Availability of Medical and Oral Health Services for People Living with HIV in British Columbia, Canada                                                                                                                                                                                                                                                  | 2 |  |  |  |  | 2 |
| Awareness and knowledge of undergraduate dental students about the signs and symptoms of Corona viral infection (COVID-19), and the required infection control measures to prevent its spread                                                                                                                                                            | 2 |  |  |  |  | 2 |
| Awareness and knowledge regarding maternal periodontal status and associated pregnancy outcomes among the gynecologists of Hubli-Dharwad                                                                                                                                                                                                                 | 2 |  |  |  |  | 2 |
| Awareness of oral health in adults with congenital heart disease                                                                                                                                                                                                                                                                                         | 2 |  |  |  |  | 2 |
| Awareness of oral health prophylaxis in pregnant women                                                                                                                                                                                                                                                                                                   | 2 |  |  |  |  | 2 |
| Awareness of Stem cells & Health Implications of SHED found in Pediatric Dentition among Indian Population                                                                                                                                                                                                                                               | 2 |  |  |  |  | 2 |
| Awareness, Attitude and Knowledge Regarding Oral Health among Pregnant Women: A Comparative Study                                                                                                                                                                                                                                                        | 2 |  |  |  |  | 2 |
| Bacteremia originating in the oral cavity. A review                                                                                                                                                                                                                                                                                                      | 2 |  |  |  |  | 2 |
| Bambui Project: an evaluation of private, public and unionized dental services]                                                                                                                                                                                                                                                                          | 2 |  |  |  |  | 2 |
| Barrier techniques and hepatitis B vaccine policies in dental components of local health agencies                                                                                                                                                                                                                                                        | 2 |  |  |  |  | 2 |
| Barriers and enablers for dental care among dentate home-based older New Zealanders who receive living support                                                                                                                                                                                                                                           | 2 |  |  |  |  | 2 |
| Barriers and facilitators for dental care among patients with severe or long-term mental illness                                                                                                                                                                                                                                                         | 2 |  |  |  |  | 2 |
| Barriers and facilitators for provision of oral health care in dependent older people: a systematic review                                                                                                                                                                                                                                               | 2 |  |  |  |  | 2 |
| Barriers and facilitators to dental care during pregnancy: a systematic review and meta-synthesis of qualitative studies                                                                                                                                                                                                                                 | 2 |  |  |  |  | 2 |
| Barriers for dental treatment of primary teeth in East and West Germany                                                                                                                                                                                                                                                                                  | 2 |  |  |  |  | 2 |
| Barriers in Access to Dental Services Hindering the Treatment of People with Disabilities: A Systematic Review                                                                                                                                                                                                                                           | 2 |  |  |  |  | 2 |
| Barriers to oral health care amongst different social classes in India                                                                                                                                                                                                                                                                                   | 2 |  |  |  |  | 2 |
| Barriers to utilisation of dental care services among children with special needs: A systematic review                                                                                                                                                                                                                                                   | 2 |  |  |  |  | 2 |
| Behavior Assessment in Children Following Hospital-Based General Anesthesia versus Office-Based General Anesthesia                                                                                                                                                                                                                                       | 2 |  |  |  |  | 2 |

|                                                                                                                                                                                                                                |   |  |  |  |  |   |
|--------------------------------------------------------------------------------------------------------------------------------------------------------------------------------------------------------------------------------|---|--|--|--|--|---|
| Behavior management and communication strategies for dental professionals when caring for patients with dementia                                                                                                               | 2 |  |  |  |  | 2 |
| Behavioral factors to include in guidelines for lifelong oral healthiness: an observational study in Japanese adults                                                                                                           | 2 |  |  |  |  | 2 |
| Behind the screens: care staff observations on delivery of oral health care in nursing homes                                                                                                                                   | 2 |  |  |  |  | 2 |
| Benefit related assessment of treatment need among institutionalised elderly people                                                                                                                                            | 2 |  |  |  |  | 2 |
| Bias in retrospective assessment of perceived dental treatment effects when using the Oral Health Impact Profile                                                                                                               | 2 |  |  |  |  | 2 |
| Bisphosphonate-associated osteonecrosis of the jaw: a literature review and clinical practice guidelines                                                                                                                       | 2 |  |  |  |  | 2 |
| Bisphosphonate-associated osteonecrosis of the jaw]                                                                                                                                                                            | 2 |  |  |  |  | 2 |
| Both non-surgical dental treatment and extractions increase the risk of medication-related osteonecrosis of the jaw: case-control study                                                                                        | 2 |  |  |  |  | 2 |
| Brazilian immigrants' oral health literacy and participation in oral health care in Canada                                                                                                                                     | 2 |  |  |  |  | 2 |
| Brazilian Primary and Secondary Public Oral Health Attention: Are Dentists Ready to Face the COVID-19 Pandemic?                                                                                                                | 2 |  |  |  |  | 2 |
| Can Caregiver Reports Reflect Dental Treatment Needs of Patients with Intellectual and Developmental Disabilities?                                                                                                             | 2 |  |  |  |  | 2 |
| Can government-supported preventive fluoride varnish application service reduce pulp-involved primary molars?                                                                                                                  | 2 |  |  |  |  | 2 |
| Can health kiosks be used to identify oral health care needs? A pilot study                                                                                                                                                    | 2 |  |  |  |  | 2 |
| Can questionnaires replace clinical surveys to assess dental treatment needs of adults?                                                                                                                                        | 2 |  |  |  |  | 2 |
| Cancer-related oral health care services and resources: a survey of oral and dental care in Canadian cancer centres                                                                                                            | 2 |  |  |  |  | 2 |
| Care of adolescents with cleft lip and palate: the role of the general dental practitioner                                                                                                                                     | 2 |  |  |  |  | 2 |
| Caregiver oral health literacy: relationship with socioeconomic factors, oral health behaviors and perceived child dental status                                                                                               | 2 |  |  |  |  | 2 |
| Caregiver perspectives in oral healthcare in an institutionalised elderly population without access to dental services: a pilot study                                                                                          | 2 |  |  |  |  | 2 |
| Caregiver-reported dementia as a predictor of oral health among patients receiving home-visit dental treatment: A retrospective cohort study                                                                                   | 2 |  |  |  |  | 2 |
| Cariogenic Potential of the commonly Prescribed Pediatric Liquid Medicaments in Kingdom of Saudi Arabia: An in vitro Study                                                                                                     | 2 |  |  |  |  | 2 |
| Case report: a rare occurrence of non-syndromic hypo-hyperdontia in the mandibular anterior region                                                                                                                             | 2 |  |  |  |  | 2 |
| Causes and pattern of tooth loss in children and adolescents in a Nigerian tertiary hospital                                                                                                                                   | 2 |  |  |  |  | 2 |
| Centre-level variation in dental treatment and oral health and individual- and area-level predictors of oral health in 5-year-old children with non-syndromic unilateral cleft lip and palate: the Cleft Care UK study. Part 3 | 2 |  |  |  |  | 2 |
| Cerebral abscesses of oral origin]                                                                                                                                                                                             | 2 |  |  |  |  | 2 |
| Challenges in providing oral and dental health services in COVID-19 pandemic                                                                                                                                                   | 2 |  |  |  |  | 2 |
| Challenges to dental access - England as a case study                                                                                                                                                                          | 2 |  |  |  |  | 2 |
| Change in oral health status among the institutionalized Norwegian elderly over a period of 16 years                                                                                                                           | 2 |  |  |  |  | 2 |
| Change in parental oral health practices following a child's dental treatment under general anaesthesia                                                                                                                        | 2 |  |  |  |  | 2 |
| Changes in aspects of children's oral-health-related quality of life following dental treatment under general anaesthesia                                                                                                      | 2 |  |  |  |  | 2 |

|                                                                                                                                                                            |   |  |  |  |  |   |
|----------------------------------------------------------------------------------------------------------------------------------------------------------------------------|---|--|--|--|--|---|
| Changes in Children's Oral Health Related Quality of Life Following Dental Treatment under General Anesthesia                                                              | 2 |  |  |  |  | 2 |
| Changes in dental anxiety among 15- to 21-year-olds. A 2-year longitudinal analysis based on the Tromsø study: Fit futures                                                 | 2 |  |  |  |  | 2 |
| Changes in dental status over 10 years in 80-year-old people: a prospective cohort study                                                                                   | 2 |  |  |  |  | 2 |
| Changes in Oral Health and Treatment Needs for Elderly Residents of Long-Term Care Facilities Over 10 Years                                                                | 2 |  |  |  |  | 2 |
| Changes in oral health-related quality of life among Austrian preschool children following dental treatment under general anaesthesia                                      | 2 |  |  |  |  | 2 |
| Changes in oral health-related quality of life among children following dental treatment under general anaesthesia. A systematic review                                    | 2 |  |  |  |  | 2 |
| Changes in oral status and dental treatment in long term hospital inmates in Stockholm from 1988 to 1990                                                                   | 2 |  |  |  |  | 2 |
| Changes in parent-assessed oral health-related quality of life among young children following dental treatment under general anaesthetic                                   | 2 |  |  |  |  | 2 |
| Changes in preschool children's oral health-related quality of life following restorative dental general anaesthesia                                                       | 2 |  |  |  |  | 2 |
| Changes in the oral health-related quality of life in adult patients with intellectual disabilities after dental treatment under general anesthesia                        | 2 |  |  |  |  | 2 |
| Changes in the oral health-related quality of life in children following comprehensive oral rehabilitation under general anaesthesia                                       | 2 |  |  |  |  | 2 |
| Changes in young children's OHRQoL after dental treatment under general anaesthesia                                                                                        | 2 |  |  |  |  | 2 |
| Changes of the dental service delivered to patients with intellectual disability under general anaesthesia in Dental Polyclinic Split, Croatia, during the years 1985-2009 | 2 |  |  |  |  | 2 |
| Changing patterns of oral health and implications for oral health manpower. Responsibility to the public                                                                   | 2 |  |  |  |  | 2 |
| Characteristics of child dental neglect: a systematic review                                                                                                               | 2 |  |  |  |  | 2 |
| Characteristics of publicly insured children with high dental expenses                                                                                                     | 2 |  |  |  |  | 2 |
| Characterization of oral health in a Portuguese population with mild intellectual disability                                                                               | 2 |  |  |  |  | 2 |
| Chemoprophylaxis of prosthetic joint patients during dental treatment: a decision-utility analysis                                                                         | 2 |  |  |  |  | 2 |
| Child dental fear: cause-related factors and clinical effects                                                                                                              | 2 |  |  |  |  | 2 |
| Child dental neglect laws: Specifications and repercussions for dentists in 51 jurisdictions                                                                               | 2 |  |  |  |  | 2 |
| Child oral health-related quality of life following treatment under dental general anaesthetic (DGA)                                                                       | 2 |  |  |  |  | 2 |
| Child-OIDP index in Brazil: cross-cultural adaptation and validation                                                                                                       | 2 |  |  |  |  | 2 |
| Childhood leukaemia: experiences of children and attitudes of parents on dental care                                                                                       | 2 |  |  |  |  | 2 |
| Children express their thoughts on oral hygiene and dental treatment. Opinions and behavior of 3000 ten-year-olds--results of a questionnaire]                             | 2 |  |  |  |  | 2 |
| Children stomatology outpatient treatment requirements analysis and countermeasures]                                                                                       | 2 |  |  |  |  | 2 |
| Children who break dental appointments                                                                                                                                     | 2 |  |  |  |  | 2 |
| Children's dental health in Europe. Clinical calibration of dental examiners in eight EU countries                                                                         | 2 |  |  |  |  | 2 |
| Children's Drawing as a Projective Measure to Understand Their Experiences of Dental Treatment under General Anesthesia                                                    | 2 |  |  |  |  | 2 |

|                                                                                                                                                                      |   |  |  |  |  |   |
|----------------------------------------------------------------------------------------------------------------------------------------------------------------------|---|--|--|--|--|---|
| Children's Oral Health and Barriers to Seeking Care: Perspectives of Caregivers Seeking Pediatric Hospital Dental Treatment                                          | 2 |  |  |  |  | 2 |
| Children's oral health-related quality of life and associated factors: Mid-term changes after dental treatment under general anesthesia                              | 2 |  |  |  |  | 2 |
| Children's oral hygiene: healthy mouth, families supervise?]                                                                                                         | 2 |  |  |  |  | 2 |
| Class attitudes to dental treatment                                                                                                                                  | 2 |  |  |  |  | 2 |
| Client perspectives on an Aboriginal community led oral health service in rural Australia                                                                            | 2 |  |  |  |  | 2 |
| Clinical aspects and conservative dental management of a patient with fibrodysplasia ossificans progressiva                                                          | 2 |  |  |  |  | 2 |
| Clinical correlates of dental anxiety among older adults                                                                                                             | 2 |  |  |  |  | 2 |
| Clinical evaluation of a new art material: Nanoparticulated resin-modified glass ionomer cement                                                                      | 2 |  |  |  |  | 2 |
| Clinical findings, dental treatment, and improvement in quality of life for a child with Rothmund-Thomson syndrome                                                   | 2 |  |  |  |  | 2 |
| Clinical impact of oral health indexes in dental extraction of hemophilic patients                                                                                   | 2 |  |  |  |  | 2 |
| Clinical management of the homozygous $\alpha$ -thalassemia with unusual mandibular manifestation of hematopoiesis                                                   | 2 |  |  |  |  | 2 |
| Clinical manifestations and oral findings in Fraser syndrome                                                                                                         | 2 |  |  |  |  | 2 |
| Clinical outcomes of primary palatoplasty in pre-school-aged cleft palate children in Srinagarind hospital: quality of life                                          | 2 |  |  |  |  | 2 |
| Clinical performance of resin-bonded composite strip crowns in primary incisors]                                                                                     | 2 |  |  |  |  | 2 |
| Clinical practice guidelines: Oral health care for children and adults living with epidermolysis bullosa                                                             | 2 |  |  |  |  | 2 |
| Clinically determined and self-reported dental status during and after pregnancy among low-income Hispanic women                                                     | 2 |  |  |  |  | 2 |
| Cocaine and oral health                                                                                                                                              | 2 |  |  |  |  | 2 |
| Cognitive Impairment in Older Adults and Oral Health Considerations: Treatment and Management                                                                        | 2 |  |  |  |  | 2 |
| Colonization of Legionella spp. In dental unit waterlines                                                                                                            | 2 |  |  |  |  | 2 |
| Combining self-management cues with incentives to promote interdental cleaning among Indian periodontal disease outpatients                                          | 2 |  |  |  |  | 2 |
| Comment on 'Class attitudes to dental treatment'                                                                                                                     | 2 |  |  |  |  | 2 |
| Committee Opinion No. 569: oral health care during pregnancy and through the lifespan                                                                                | 2 |  |  |  |  | 2 |
| Community coordination of dental care needs in a home medical care support ward and at home]                                                                         | 2 |  |  |  |  | 2 |
| Community dental clinics in British Columbia, Canada: examining the potential as health equity interventions                                                         | 2 |  |  |  |  | 2 |
| Community socioeconomic status and children's dental health                                                                                                          | 2 |  |  |  |  | 2 |
| Comorbidities in older patients with HIV: a retrospective study                                                                                                      | 2 |  |  |  |  | 2 |
| Comparative Assessment of Conventional Composites and Coloured Compomers in Permanent Molars of Children with Mixed Dentition: A Pilot Study                         | 2 |  |  |  |  | 2 |
| Comparative Assessment of Oral Health Related Quality of Life of Children Before and After Full Mouth Rehabilitation under General Anaesthesia and Local Anaesthesia | 2 |  |  |  |  | 2 |
| Comparative Evaluation of BMI, Dental Age, Salivary Alkaline Phosphatase Levels, and Oral Health Status in Children with $\beta$ Thalassemia Major                   | 2 |  |  |  |  | 2 |
| Comparative Evaluation of Oral Health Knowledge, Practices and Attitude of Pregnant and Non-Pregnant Women, and Their Awareness Regarding Adverse Pregnancy Outcomes | 2 |  |  |  |  | 2 |
| Comparative Evaluation of Pediatric Patients with Mental Retardation undergoing Dental Treatment under General Anesthesia: A Retrospective Analysis                  | 2 |  |  |  |  | 2 |

|                                                                                                                                                                                            |   |  |  |  |  |   |
|--------------------------------------------------------------------------------------------------------------------------------------------------------------------------------------------|---|--|--|--|--|---|
| Comparative validity of the OIDP and OHIP-14 in describing the impact of oral health on quality of life in a cross-sectional study performed in Spanish adults                             | 2 |  |  |  |  | 2 |
| Comparing self-reported and clinically diagnosed unmet dental treatment needs using a nationally representative survey                                                                     | 2 |  |  |  |  | 2 |
| Comparing the outcomes of gold-standard dental examinations with photographic screening by mid-level dental providers                                                                      | 2 |  |  |  |  | 2 |
| Comparison between restorations in the permanent dentition produced by hand and rotary instrumentation--survival after 3 years                                                             | 2 |  |  |  |  | 2 |
| Comparison of Children's Oral Health Related Quality Of Life Pre- and Post Dental Treatment Under General Anesthesia Using F-ECOHIS Questionnaire                                          | 2 |  |  |  |  | 2 |
| Comparison of dental treatment performed under general anesthesia between healthy children and children with special health care needs in a hospital setting, Saudi Arabia                 | 2 |  |  |  |  | 2 |
| Comparison of Gingival Health and Salivary Parameters among Autistic and Non-Autistic School Children in Riyadh                                                                            | 2 |  |  |  |  | 2 |
| Comparison of ideal and actual behavior of patients and dentists during dental treatment                                                                                                   | 2 |  |  |  |  | 2 |
| Comparison of long-term dental treatment effects of children treated under general anesthesia and passive restraint]                                                                       | 2 |  |  |  |  | 2 |
| Comparison of oral health assessments between nursing staff and patients on medical wards                                                                                                  | 2 |  |  |  |  | 2 |
| Comparison of the COHIP and OHIP- 14 as measures of the oral health-related quality of life of adolescents                                                                                 | 2 |  |  |  |  | 2 |
| Comparison of the discriminative ability of the generic and condition-specific forms of the Child-OIDP index: a study on children with different types of normative dental treatment needs | 2 |  |  |  |  | 2 |
| Comparison of two oral health-related quality of life measures among adult dental patients                                                                                                 | 2 |  |  |  |  | 2 |
| Complete clinical retention of sealant materials should not be contemplated as cut-off for clinical success                                                                                | 2 |  |  |  |  | 2 |
| Complete removable prostheses: from expectation to (dis)satisfaction                                                                                                                       | 2 |  |  |  |  | 2 |
| Compliance with dental treatment recommendations by rural paediatric patients after a live-video teledentistry consultation: A preliminary report                                          | 2 |  |  |  |  | 2 |
| Complications due to the waiting period for dental treatment under general anaesthesia]                                                                                                    | 2 |  |  |  |  | 2 |
| Complications of ambulatory oral surgery in patients over 65 years of age                                                                                                                  | 2 |  |  |  |  | 2 |
| Comprehensive dental evaluation of children with congenital or acquired heart disease                                                                                                      | 2 |  |  |  |  | 2 |
| Comprehensive dental treatment of a patient with Huntington's disease: literature review and case report                                                                                   | 2 |  |  |  |  | 2 |
| Comprehensive oral care improves treatment outcomes in male and female patients with high-severity and chronic substance use disorders                                                     | 2 |  |  |  |  | 2 |
| Conceptions of dental amalgam and oral health aspects during pregnancy in Finnish women                                                                                                    | 2 |  |  |  |  | 2 |
| Concomitant surgical treatment of dental and valvular heart diseases                                                                                                                       | 2 |  |  |  |  | 2 |
| Concordance among different pain scales in patients with dental pain                                                                                                                       | 2 |  |  |  |  | 2 |
| Conflicting priorities: oral health in long-term care                                                                                                                                      | 2 |  |  |  |  | 2 |
| Conscious sedation in children: the need to strengthen the evidence base remains                                                                                                           | 2 |  |  |  |  | 2 |

|                                                                                                                                                               |   |  |  |  |  |   |
|---------------------------------------------------------------------------------------------------------------------------------------------------------------|---|--|--|--|--|---|
| Conscious Sedation with Nitrous Oxide to control Stress during Dental Treatment in Patients with Cerebral Palsy: An Experimental Clinical Trial               | 2 |  |  |  |  | 2 |
| Consensus statement by hospital based dentists providing dental treatment for patients with inherited bleeding disorders                                      | 2 |  |  |  |  | 2 |
| Consequences of childhood sexual abuse experiences on dental care                                                                                             | 2 |  |  |  |  | 2 |
| Consideration in Planning Dental Treatment of Older Adults                                                                                                    | 2 |  |  |  |  | 2 |
| Contextual and individual assessment of dental pain period prevalence in adolescents: a multilevel approach                                                   | 2 |  |  |  |  | 2 |
| Contextual and individual determinants of non-utilization of dental services among Brazilian adults                                                           | 2 |  |  |  |  | 2 |
| Continuity of care in a county dental public health center                                                                                                    | 2 |  |  |  |  | 2 |
| Continuity of dental treatment by users of Alberta's universal dental plan for the elderly                                                                    | 2 |  |  |  |  | 2 |
| Contribution of benzodiazepines in dental care of patients with special needs                                                                                 | 2 |  |  |  |  | 2 |
| Contribution of Perioperative Oral Health Care and Management for Patients who Underwent General Thoracic Surgery]                                            | 2 |  |  |  |  | 2 |
| Controversial issues in treating the dental patient with autism                                                                                               | 2 |  |  |  |  | 2 |
| Cosmetic dental treatment in an adult Dutch population                                                                                                        | 2 |  |  |  |  | 2 |
| Cosmetic dental treatment. Its impact on happiness and quality of life]                                                                                       | 2 |  |  |  |  | 2 |
| Cost-Effectiveness of Periodontitis Management in Public Sector Specialist Periodontal Clinics: A Societal Perspective Research in Malaysia                   | 2 |  |  |  |  | 2 |
| Cost-effectiveness of preventive oral health care in medical offices for young Medicaid enrollees                                                             | 2 |  |  |  |  | 2 |
| Countering the poor oral health of people with intellectual and developmental disability: a scoping literature review                                         | 2 |  |  |  |  | 2 |
| COVID-19 and medical emergencies in the dental practice                                                                                                       | 2 |  |  |  |  | 2 |
| COVID-19 Transmission in Dental Practice: Brief Review of Preventive Measures in Italy                                                                        | 2 |  |  |  |  | 2 |
| COVID-19 transmission risk and protective protocols in dentistry: a systematic review                                                                         | 2 |  |  |  |  | 2 |
| Covid-19: a survey on knowledge, awareness and hygiene practices among dental health professionals in an Indian scenario                                      | 2 |  |  |  |  | 2 |
| Criteria for selecting children with special needs for dental treatment under general anaesthesia                                                             | 2 |  |  |  |  | 2 |
| Cross cultural adaptation and validation of the Early Childhood Health Impact Scale (ECOHIS) in Peruvian preschoolers                                         | 2 |  |  |  |  | 2 |
| Cross-cultural adaptation and psychometric properties of the Brazilian version of the scale of oral health outcomes for 5-year-old children (SOHO-5)          | 2 |  |  |  |  | 2 |
| Cross-cultural Adaptation and Psychometric Properties of the Indonesia Version of the Scale of Oral Health Outcomes for 5-Year-Old Children                   | 2 |  |  |  |  | 2 |
| Cross-cultural differences in oral impacts on daily performance between Greek and British older adults                                                        | 2 |  |  |  |  | 2 |
| Cruise medicine: the dental perspective on health care for passengers during a world cruise                                                                   | 2 |  |  |  |  | 2 |
| Current issues in gerodontology                                                                                                                               | 2 |  |  |  |  | 2 |
| Current status of the influence of osteoporosis on periodontology and implant dentistry                                                                       | 2 |  |  |  |  | 2 |
| Delay in the Referral of Pregnant Patients with Fascial Spaces Infection: A Cross-Sectional Observational Study from Khartoum Teaching Dental Hospital, Sudan | 2 |  |  |  |  | 2 |
| Delta Dental Plan of Massachusetts' perspective on financing                                                                                                  | 2 |  |  |  |  | 2 |

|                                                                                                                                                                                          |   |  |  |  |  |   |
|------------------------------------------------------------------------------------------------------------------------------------------------------------------------------------------|---|--|--|--|--|---|
| Demand for and utilization of dental services according to household income in the adult population in Norway                                                                            | 2 |  |  |  |  | 2 |
| Demographic profile, plaque index and DMFT scores of young individuals with dental anxiety and exaggerated gag reflex                                                                    | 2 |  |  |  |  | 2 |
| Demographic, social and cultural factors influencing the elderly to seek dental treatment                                                                                                | 2 |  |  |  |  | 2 |
| Denial of Operating Room Access for Pediatric Dental Treatment: A National Survey                                                                                                        | 2 |  |  |  |  | 2 |
| Denosumab-related osteonecrosis of the jaw in a patient with bone metastases of prostate cancer: A case report and literature review                                                     | 2 |  |  |  |  | 2 |
| Dental and oncological status of patients with tongue carcinoma]                                                                                                                         | 2 |  |  |  |  | 2 |
| Dental and oral care for chronically ill children and adolescents                                                                                                                        | 2 |  |  |  |  | 2 |
| Dental and oral surgical treatment of the mentally retarded in Hungary: the situation in the past, currently and hopes for the future]                                                   | 2 |  |  |  |  | 2 |
| Dental and periodontal problems of elderly people in Vietnamese nursing homes                                                                                                            | 2 |  |  |  |  | 2 |
| Dental and periodontal status and treatment needs of institutionalized mentally retarded children from the province of West Pomerania]                                                   | 2 |  |  |  |  | 2 |
| DENTAL ANXIETY AMONG CHILDREN OF AGE BETWEEN 5 TO 10 YEARS VISITING A TEACHING DENTAL HOSPITAL IN ISLAMABAD, PAKISTAN                                                                    | 2 |  |  |  |  | 2 |
| Dental anxiety among dental, medical, and nursing students of two major universities in the central region of the Kingdom of Saudi Arabia: a cross-sectional study                       | 2 |  |  |  |  | 2 |
| Dental anxiety and dental pain in 5- to 12-year-old children in Recife, Brazil                                                                                                           | 2 |  |  |  |  | 2 |
| Dental anxiety and DMFS status: association within a US naval population versus differences between groups                                                                               | 2 |  |  |  |  | 2 |
| Dental anxiety and influencing factors: A cross-sectional questionnaire-based survey                                                                                                     | 2 |  |  |  |  | 2 |
| Dental anxiety and oral health in young Israeli male adults                                                                                                                              | 2 |  |  |  |  | 2 |
| Dental anxiety and oral health-related quality of life in children following dental rehabilitation under general anesthesia or intravenous sedation: A prospective cross-sectional study | 2 |  |  |  |  | 2 |
| Dental anxiety and quality of life: the effect of dental treatment                                                                                                                       | 2 |  |  |  |  | 2 |
| Dental anxiety in 6-7-year-old children treated in accordance with conventional restorative treatment                                                                                    | 2 |  |  |  |  | 2 |
| Dental anxiety in Fiji                                                                                                                                                                   | 2 |  |  |  |  | 2 |
| Dental anxiety in Iceland: an epidemiological postal survey                                                                                                                              | 2 |  |  |  |  | 2 |
| Dental aspects of cardiac transplantation                                                                                                                                                | 2 |  |  |  |  | 2 |
| Dental attendance and self-assessment of dental status by Israeli military personnel according to gender, education, and smoking status, 1998-2006                                       | 2 |  |  |  |  | 2 |
| Dental attendance behaviour of children in Scotland between 1983 and 1988                                                                                                                | 2 |  |  |  |  | 2 |
| Dental attendance patterns in renal transplant recipients                                                                                                                                | 2 |  |  |  |  | 2 |
| Dental Camp Experience in Lifeline Express (LLE) Train among Rural Population of Central, India                                                                                          | 2 |  |  |  |  | 2 |
| Dental care access among individuals with Down syndrome in France                                                                                                                        | 2 |  |  |  |  | 2 |
| Dental care and associated factors among older adults with schizophrenia                                                                                                                 | 2 |  |  |  |  | 2 |
| Dental care and treatment needs of elderly in nursing homes in Saarland: perceptions of the homes managers                                                                               | 2 |  |  |  |  | 2 |
| Dental care as a vital service response for disaster victims                                                                                                                             | 2 |  |  |  |  | 2 |
| Dental Care during COVID-19 Outbreak: A Web-Based Survey                                                                                                                                 | 2 |  |  |  |  | 2 |

|                                                                                                                                                  |   |  |  |  |  |   |
|--------------------------------------------------------------------------------------------------------------------------------------------------|---|--|--|--|--|---|
| Dental care during pregnancy]                                                                                                                    | 2 |  |  |  |  | 2 |
| Dental Care for a Child with Congenital Hydrocephalus: A Case Report with 12-Month Follow-Up                                                     | 2 |  |  |  |  | 2 |
| Dental care for children fed by tube: a critical review                                                                                          | 2 |  |  |  |  | 2 |
| Dental care for institutionalized geriatric patients in Germany                                                                                  | 2 |  |  |  |  | 2 |
| Dental care management in a child with recessive dystrophic epidermolysis bullosa                                                                | 2 |  |  |  |  | 2 |
| Dental Care Needs of Male versus Female Children Visiting a School-based Mobile Dental Facility in West Virginia                                 | 2 |  |  |  |  | 2 |
| Dental care of autistic children within the non-specialized Public Dental Service                                                                | 2 |  |  |  |  | 2 |
| Dental care of HIV-infected patients: attitudes and behavior among Danish dentists                                                               | 2 |  |  |  |  | 2 |
| Dental care of mentally retarded persons]                                                                                                        | 2 |  |  |  |  | 2 |
| Dental care throughout pregnancy: what a dentist must know                                                                                       | 2 |  |  |  |  | 2 |
| Dental care utilization and satisfaction of residential university students                                                                      | 2 |  |  |  |  | 2 |
| Dental Challenges and the Needs of the Population during the Covid-19 Pandemic Period. Real-Time Surveillance Using Google Trends                | 2 |  |  |  |  | 2 |
| Dental considerations for patients taking weight-loss medications                                                                                | 2 |  |  |  |  | 2 |
| Dental considerations in cardiovascular patients: A practical perspective                                                                        | 2 |  |  |  |  | 2 |
| Dental coping strategies, general anxiety, and depression among adult patients with dental anxiety but with different dental-attendance patterns | 2 |  |  |  |  | 2 |
| Dental disease and dental treatment in patients of dental practices]                                                                             | 2 |  |  |  |  | 2 |
| Dental disease and work loss                                                                                                                     | 2 |  |  |  |  | 2 |
| Dental diseases and gastroenterology                                                                                                             | 2 |  |  |  |  | 2 |
| Dental Experience, Anxiety, and Oral Health in Low-income Chilean Children                                                                       | 2 |  |  |  |  | 2 |
| Dental Fear and Avoidance in Treatment Seekers at a Large, Urban Dental Clinic                                                                   | 2 |  |  |  |  | 2 |
| Dental fear and oral health and family characteristics of Finnish children                                                                       | 2 |  |  |  |  | 2 |
| Dental fear of Finnish children in the light of different measures of dental fear                                                                | 2 |  |  |  |  | 2 |
| Dental fear treatment: comparison of a video training procedure and clinical rehearsals                                                          | 2 |  |  |  |  | 2 |
| Dental fear with and without blood-injection fear: implications for dental health and clinical practice                                          | 2 |  |  |  |  | 2 |
| Dental findings and muscular-skeletal features in Schwartz-Jampel syndrome: case report of two affected siblings                                 | 2 |  |  |  |  | 2 |
| Dental general anaesthetic receipt among Australians aged 15+ years, 1998-1999 to 2004-2005                                                      | 2 |  |  |  |  | 2 |
| Dental health among homebound mental (psychiatric) patients]                                                                                     | 2 |  |  |  |  | 2 |
| Dental health and access to dental treatment: a comparison of drug users and non-drug users attending community pharmacies                       | 2 |  |  |  |  | 2 |
| Dental health and dental treatment needs among recruits of the Finnish Defence Forces, 1919-91                                                   | 2 |  |  |  |  | 2 |
| Dental health and disease in patients with haemophilia--a case-control study                                                                     | 2 |  |  |  |  | 2 |
| Dental health and the state of oral hygiene in an elderly population in Rome]                                                                    | 2 |  |  |  |  | 2 |
| Dental health and treatment needs among a sample of Bangladeshi medical users aged 40 years and over living in Tower Hamlets, UK                 | 2 |  |  |  |  | 2 |

|                                                                                                                                                                                                                    |   |  |  |  |  |   |
|--------------------------------------------------------------------------------------------------------------------------------------------------------------------------------------------------------------------|---|--|--|--|--|---|
| Dental health awareness, attitude, and dental health-care seeking practices as risk indicators for the prevalence of periodontal disease among 15-17-year-old school children in Kozhikode district, Kerala, India | 2 |  |  |  |  | 2 |
| Dental health between self-perception, clinical evaluation and body image dissatisfaction - a cross-sectional study in mixed dentition pre-pubertal children                                                       | 2 |  |  |  |  | 2 |
| Dental health concerns and advances in preventive dentistry in Great Britain]                                                                                                                                      | 2 |  |  |  |  | 2 |
| Dental health in a group of drug addicts attending an addiction-clinic                                                                                                                                             | 2 |  |  |  |  | 2 |
| Dental health in relation to attitudes to fluoridation and dental treatment                                                                                                                                        | 2 |  |  |  |  | 2 |
| Dental health of community-living older people attending secondary healthcare: a cross-sectional comparison between those with and without diagnosed mental illness                                                | 2 |  |  |  |  | 2 |
| Dental health of Finnish immigrants in Sweden                                                                                                                                                                      | 2 |  |  |  |  | 2 |
| Dental health problems of the geriatric population                                                                                                                                                                 | 2 |  |  |  |  | 2 |
| Dental health professionals' treatment of children with disabilities: a qualitative study                                                                                                                          | 2 |  |  |  |  | 2 |
| Dental Health Services Response to COVID-19 in Norway                                                                                                                                                              | 2 |  |  |  |  | 2 |
| Dental health status and treatment needs in the infantry regiment of the Malaysian Territorial Army                                                                                                                | 2 |  |  |  |  | 2 |
| Dental health status and treatment needs of elderly residents of Edmonton, Alberta                                                                                                                                 | 2 |  |  |  |  | 2 |
| Dental health status of an aging VA population: implications for a preventive dental health care program                                                                                                           | 2 |  |  |  |  | 2 |
| Dental health-care service utilisation and its determinants in West Iran: a cross-sectional study                                                                                                                  | 2 |  |  |  |  | 2 |
| Dental health, dental neglect, and use of services in an adult Dunedin population sample                                                                                                                           | 2 |  |  |  |  | 2 |
| Dental hygienists on top of the world: supporting oral health education in Nepal                                                                                                                                   | 2 |  |  |  |  | 2 |
| Dental Hygienists' Knowledge, Attitudes, and Comfort Level in Treating Patients with Dental Anxiety                                                                                                                | 2 |  |  |  |  | 2 |
| Dental infections and general health                                                                                                                                                                               | 2 |  |  |  |  | 2 |
| Dental Insurance and Treatment Patterns at a Not-For-Profit Community Dental Clinic                                                                                                                                | 2 |  |  |  |  | 2 |
| Dental insurance systems in light of present-day prevention potentials]                                                                                                                                            | 2 |  |  |  |  | 2 |
| Dental knowledge, attitudes and behavior among Kuwaiti mothers and school teachers                                                                                                                                 | 2 |  |  |  |  | 2 |
| Dental knowledge, attitudes, and behaviors of Indochinese and Australian-born adolescents                                                                                                                          | 2 |  |  |  |  | 2 |
| Dental management of a child with ectrodactyly ectodermal dysplasia cleft lip/palate syndrome: A case report                                                                                                       | 2 |  |  |  |  | 2 |
| Dental management of children with special healthcare needs                                                                                                                                                        | 2 |  |  |  |  | 2 |
| Dental management of long-term amyotrophic lateral sclerosis: case report                                                                                                                                          | 2 |  |  |  |  | 2 |
| Dental management of low socioeconomic level patients before radiotherapy of the head and neck with special emphasis on the prevention of osteoradionecrosis                                                       | 2 |  |  |  |  | 2 |
| Dental management of pediatric HIV patients--state of Israel, Ministry of Health Project at Rambam Health Care Campus, 2006-2011                                                                                   | 2 |  |  |  |  | 2 |
| Dental management prior to hematopoietic stem cell transplantation                                                                                                                                                 | 2 |  |  |  |  | 2 |
| Dental needs and management of children with special health care needs according to type of disability                                                                                                             | 2 |  |  |  |  | 2 |

|                                                                                                                                                                |   |  |  |  |  |   |
|----------------------------------------------------------------------------------------------------------------------------------------------------------------|---|--|--|--|--|---|
| Dental needs and socioeconomic status associated with utilization of dental services in the presence of dental pain: a case-control study in children          | 2 |  |  |  |  | 2 |
| Dental needs of intellectually disabled children attending six special educational facilities in Cape Town                                                     | 2 |  |  |  |  | 2 |
| Dental needs of psychiatric patient with eating disorders                                                                                                      | 2 |  |  |  |  | 2 |
| Dental needs of the elderly in residential care in Newcastle-upon-Tyne and the role of formal carers                                                           | 2 |  |  |  |  | 2 |
| Dental pain and associated factors in Brazilian preschoolers                                                                                                   | 2 |  |  |  |  | 2 |
| Dental pain and dental treatment of young children attending the general dental service                                                                        | 2 |  |  |  |  | 2 |
| Dental pain in the previous 3 months in adolescents and Family Health Strategy: the comparison between two areas with different to oralhealth care approaches] | 2 |  |  |  |  | 2 |
| Dental pain, oral impacts and perceived need for dental treatment in Tanzanian school students: a cross-sectional study                                        | 2 |  |  |  |  | 2 |
| Dental Patient-Reported Outcome Measures Are Essential for Evidence-Based Prosthetic Dentistry                                                                 | 2 |  |  |  |  | 2 |
| Dental Phobia among Pregnant Women: Considerations for Healthcare Professionals                                                                                | 2 |  |  |  |  | 2 |
| Dental practice during a world cruise: characterisation of oral health at sea                                                                                  | 2 |  |  |  |  | 2 |
| Dental practice during a world cruise: treatment needs and demands of crew                                                                                     | 2 |  |  |  |  | 2 |
| Dental practitioners&#039; attitudes                                                                                                                           | 2 |  |  |  |  | 2 |
| Dental profile of patients with Gaucher disease                                                                                                                | 2 |  |  |  |  | 2 |
| Dental quackery in India: an insight on malpractices and measures to tackle them                                                                               | 2 |  |  |  |  | 2 |
| Dental Records and what they can Reveal about Tobacco Use Intervention Practices                                                                               | 2 |  |  |  |  | 2 |
| Dental Rehabilitation of a Child with Acute Lymphocytic Leukemia: A Case Report                                                                                | 2 |  |  |  |  | 2 |
| Dental screening in schools: the views of parents, teachers and school nurses                                                                                  | 2 |  |  |  |  | 2 |
| Dental screening of older adults living in residential aged care facilities in Perth                                                                           | 2 |  |  |  |  | 2 |
| Dental screening prior to valve interventions: Should we prepare transcatheter aortic valve replacement candidates for "surgery"?                              | 2 |  |  |  |  | 2 |
| Dental service utilization by Europeans aged 50 plus                                                                                                           | 2 |  |  |  |  | 2 |
| Dental services for adults with a learning disability: care managers' experiences and opinions                                                                 | 2 |  |  |  |  | 2 |
| Dental status among schoolchildren in Kaunas and analysis of oral health care]                                                                                 | 2 |  |  |  |  | 2 |
| Dental status and dental needs of an elderly population in Israel                                                                                              | 2 |  |  |  |  | 2 |
| Dental status and dental treatment demands in preschoolers from urban and underprivileged urban areas in Mendoza city, Argentina                               | 2 |  |  |  |  | 2 |
| Dental status and oral health of patients with epilepsy: an epidemiologic study                                                                                | 2 |  |  |  |  | 2 |
| DENTAL STATUS FEATURES IN PATIENTS DURING ANTI-CANCER CHEMOTHERAPY (TRANSCARPATHIAN ANTITUMOR CENTER EXPERIENCE)                                               | 2 |  |  |  |  | 2 |
| Dental status of schoolchildren from a rural community in Cameroon                                                                                             | 2 |  |  |  |  | 2 |
| Dental status, visits, and functional ability and dietary intake of elderly in Israel                                                                          | 2 |  |  |  |  | 2 |
| Dental students' knowledge of and attitudes toward anticoagulation dental treatment: assessment of a one-day course at the University of Murcia, Spain         | 2 |  |  |  |  | 2 |

|                                                                                                                                                            |   |  |  |  |  |   |
|------------------------------------------------------------------------------------------------------------------------------------------------------------|---|--|--|--|--|---|
| Dental students' perceptions of community-based education: a retrospective study at a dental school in Brazil                                              | 2 |  |  |  |  | 2 |
| Dental survey of 620 Soviet immigrants                                                                                                                     | 2 |  |  |  |  | 2 |
| Dental symptomatology associated with connective tissue anomalies]                                                                                         | 2 |  |  |  |  | 2 |
| Dental tooth surface loss and quality of life in university students                                                                                       | 2 |  |  |  |  | 2 |
| Dental tourists: treat, re-treat or do not treat?                                                                                                          | 2 |  |  |  |  | 2 |
| Dental treatment and recommended management in patients at risk of infective endocarditis                                                                  | 2 |  |  |  |  | 2 |
| Dental treatment and the alcoholic                                                                                                                         | 2 |  |  |  |  | 2 |
| Dental treatment considerations for a pediatric patient with incontinentia pigmenti (Bloch-Sulzberger syndrome)                                            | 2 |  |  |  |  | 2 |
| Dental Treatment Considerations for Children with Complex Medical Histories: A Case of Townes-Brock Syndrome                                               | 2 |  |  |  |  | 2 |
| Dental treatment demands among patients in Tanzania                                                                                                        | 2 |  |  |  |  | 2 |
| Dental treatment during pregnancy: a preventive approach                                                                                                   | 2 |  |  |  |  | 2 |
| Dental treatment during pregnancy]                                                                                                                         | 2 |  |  |  |  | 2 |
| Dental treatment for people with challenging behaviour: general anaesthesia or sedation?                                                                   | 2 |  |  |  |  | 2 |
| Dental treatment for the handicapped by a combination of public community, dental association and university hospital--a system of Suginoki Dental Clinic] | 2 |  |  |  |  | 2 |
| Dental treatment improves self-rated oral health in homeless veterans--a brief communication                                                               | 2 |  |  |  |  | 2 |
| Dental treatment improves the oral health-related quality of life of adolescents: A mixed-methods approach                                                 | 2 |  |  |  |  | 2 |
| Dental treatment in Angelman syndrome patients. 8 case reports                                                                                             | 2 |  |  |  |  | 2 |
| Dental treatment in children with asthma - a review                                                                                                        | 2 |  |  |  |  | 2 |
| Dental treatment in children with dystrophic form of epidermolysis bullosa]                                                                                | 2 |  |  |  |  | 2 |
| Dental treatment in the north area of Ishigaki Island in Okinawa]                                                                                          | 2 |  |  |  |  | 2 |
| Dental treatment injuries in the Finnish Patient Insurance Centre in 2000-2011                                                                             | 2 |  |  |  |  | 2 |
| Dental treatment intensity in frail older adults in the last year of life                                                                                  | 2 |  |  |  |  | 2 |
| Dental treatment needed for the people in 156 Bangkok slums]                                                                                               | 2 |  |  |  |  | 2 |
| Dental treatment needs and demands of an elderly population in England                                                                                     | 2 |  |  |  |  | 2 |
| Dental treatment needs and health care-seeking behaviours of patients with acute odontogenic infections in Lithuania                                       | 2 |  |  |  |  | 2 |
| Dental treatment needs in Dutch nursing homes offering integrated dental care                                                                              | 2 |  |  |  |  | 2 |
| Dental treatment needs in the Canadian population: analysis of a nationwide cross-sectional survey                                                         | 2 |  |  |  |  | 2 |
| Dental treatment needs in three institutions for the handicapped                                                                                           | 2 |  |  |  |  | 2 |
| Dental treatment needs of a cohort of Royal Air Force recruits over 5 years                                                                                | 2 |  |  |  |  | 2 |
| Dental treatment needs of children in a rural subcounty of Uganda                                                                                          | 2 |  |  |  |  | 2 |
| Dental treatment needs of children in a rural subcounty of Uganda.                                                                                         | 2 |  |  |  |  | 2 |
| Dental treatment needs of children with disabilities                                                                                                       | 2 |  |  |  |  | 2 |
| Dental treatment needs of permanent first molars in mashhad schoolchildren                                                                                 | 2 |  |  |  |  | 2 |
| Dental treatment needs using a sociodental approach among south Indian youths: a cross-sectional study                                                     | 2 |  |  |  |  | 2 |
| Dental treatment of a prospective recipient of a liver transplant: a case report                                                                           | 2 |  |  |  |  | 2 |
| Dental treatment of fearful children: subjection, denial or -guidance?]                                                                                    | 2 |  |  |  |  | 2 |

|                                                                                                                                                                                                            |   |  |  |  |  |   |
|------------------------------------------------------------------------------------------------------------------------------------------------------------------------------------------------------------|---|--|--|--|--|---|
| Dental treatment of pregnant women: the role of healthcare professionals]                                                                                                                                  | 2 |  |  |  |  | 2 |
| Dental treatment outcomes among dentate nursing facility residents: an initial study                                                                                                                       | 2 |  |  |  |  | 2 |
| Dental treatment planning and management for the mouth cancer patient                                                                                                                                      | 2 |  |  |  |  | 2 |
| Dental treatment planning considerations for patients using cannabis: A case report                                                                                                                        | 2 |  |  |  |  | 2 |
| Dental treatment recommendations and coronavirus disease 19 (COVID-19)                                                                                                                                     | 2 |  |  |  |  | 2 |
| Dental treatment under general anaesthesia: the short-term change in young children's oral-health-related quality of life                                                                                  | 2 |  |  |  |  | 2 |
| Dental treatment under general anaesthetic and children's oral health-related quality of life                                                                                                              | 2 |  |  |  |  | 2 |
| Dental treatment under general anesthesia in adults with special needs at the University Hospital of Dental Prosthetics and Restorative Dentistry of Innsbruck, Austria: a retrospective study of 12 years | 2 |  |  |  |  | 2 |
| Dental visits, dental health status and need for dental treatment in a Danish industrial population                                                                                                        | 2 |  |  |  |  | 2 |
| Dentist ordered to pay \$82,000 for denial of care                                                                                                                                                         | 2 |  |  |  |  | 2 |
| Dentist-patient interactions in treatment decision-making: a qualitative study                                                                                                                             | 2 |  |  |  |  | 2 |
| Dentistry and obesity: a review and current status in U.S. predoctoral dental education                                                                                                                    | 2 |  |  |  |  | 2 |
| Dentistry at the crossroads                                                                                                                                                                                | 2 |  |  |  |  | 2 |
| Dentistry in the 21st century: challenges of a globalising world                                                                                                                                           | 2 |  |  |  |  | 2 |
| Dentists' perceived stress and its relation to perceptions about anxious patients                                                                                                                          | 2 |  |  |  |  | 2 |
| Dentists' perspectives on barriers to providing oral health care in French psychiatric hospitals with on-site dental clinics                                                                               | 2 |  |  |  |  | 2 |
| Dentists' views on the effects of changing economic conditions on dental services provided for children and adolescents in Iceland                                                                         | 2 |  |  |  |  | 2 |
| Dentition status and treatment needs among children with impaired hearing attending a special school for the deaf and mute in Udaipur, India                                                               | 2 |  |  |  |  | 2 |
| Dentition status and treatment needs of prisoners of Haryana state, India                                                                                                                                  | 2 |  |  |  |  | 2 |
| Dentoalveolar abscess: A case of poor dental visit and unawareness of dental treatment ?                                                                                                                   | 2 |  |  |  |  | 2 |
| Department of Community Dentistry, University of Florida College of Dentistry, Gainesville, Florida                                                                                                        | 2 |  |  |  |  | 2 |
| Department of Veterans Affairs Consensus: Preradiation dental treatment guidelines for patients with head and neck cancer                                                                                  | 2 |  |  |  |  | 2 |
| Deprivation and oral health: a review                                                                                                                                                                      | 2 |  |  |  |  | 2 |
| Derivation of the short form of the Oral Health Impact Profile in Spanish (OHIP-EE-14)                                                                                                                     | 2 |  |  |  |  | 2 |
| Desensitization of the gag reflex in an adult with cerebral palsy: a case report                                                                                                                           | 2 |  |  |  |  | 2 |
| Design of an innovative paediatric capitation payment approach for public sector dentistry: an Australian experience                                                                                       | 2 |  |  |  |  | 2 |
| Determinants of dental treatment avoidance: findings from a nationally representative study                                                                                                                | 2 |  |  |  |  | 2 |
| Determinants of masticatory performance assessed by mixing ability tests                                                                                                                                   | 2 |  |  |  |  | 2 |
| Developing a standard set of patient-centred outcomes for adult oral health - an international, cross-disciplinary consensus                                                                               | 2 |  |  |  |  | 2 |
| Developing short-form measures of oral health-related quality of life                                                                                                                                      | 2 |  |  |  |  | 2 |

|                                                                                                                                                               |   |  |  |  |  |   |
|---------------------------------------------------------------------------------------------------------------------------------------------------------------|---|--|--|--|--|---|
| Development and evaluation of an oral health literacy instrument for adults                                                                                   | 2 |  |  |  |  | 2 |
| Development and feasibility of a tailored habit-based dietary intervention coupled with natural tooth replacement on the nutritional status of older patients | 2 |  |  |  |  | 2 |
| Development and validation of a scale measuring the locus of control orientation in relation to socio-dental effects                                          | 2 |  |  |  |  | 2 |
| Development and validation of the Mini Dental Assessment : A procedure for improved estimation of need for dental treatment in geriatrics]                    | 2 |  |  |  |  | 2 |
| Development and validation of the Spanish Interval Scale of Anxiety Response (ISAR)                                                                           | 2 |  |  |  |  | 2 |
| Development of a basic root canal treatment (BRT) for primary oral health care--evaluation after one year                                                     | 2 |  |  |  |  | 2 |
| Development of a classification and index of dental treatment experience for adults                                                                           | 2 |  |  |  |  | 2 |
| Development of a screening tool to assess the suitability of people with a disability for oral care under sedation or general anesthesia                      | 2 |  |  |  |  | 2 |
| Development of Oral Health Impacts on Daily Living Questionnaire Items - a Qualitative Study                                                                  | 2 |  |  |  |  | 2 |
| Development of oral hygiene self-efficacy and outcome expectancy questionnaires                                                                               | 2 |  |  |  |  | 2 |
| Development of Routine Dental Care for Liver Transplant Outpatients                                                                                           | 2 |  |  |  |  | 2 |
| Development of the Geriatric Oral Health Assessment Index                                                                                                     | 2 |  |  |  |  | 2 |
| Development of undergraduate gerodontology courses in Austria, Switzerland, and Germany from 2004 to 2009                                                     | 2 |  |  |  |  | 2 |
| Diabetes and oral health: an overview                                                                                                                         | 2 |  |  |  |  | 2 |
| Diabetes and oral health: doctors' knowledge, perception and practices                                                                                        | 2 |  |  |  |  | 2 |
| Diabetes mellitus: an updated overview of medical management and dental implications                                                                          | 2 |  |  |  |  | 2 |
| Diagnosis and treatment of dental emergencies in two Finnish cities                                                                                           | 2 |  |  |  |  | 2 |
| Dialysis vintage time has the strongest correlation to psychosocial pattern of oral health-related quality of life - a multicentre cross-sectional study      | 2 |  |  |  |  | 2 |
| Differences in Emotional and Pain-Related Language in Tweets About Dentists and Medical Doctors: Text Analysis of Twitter Content                             | 2 |  |  |  |  | 2 |
| Digital Oral Medicine for the Elderly                                                                                                                         | 2 |  |  |  |  | 2 |
| Discussions on oral health care among elderly Chinese immigrants in Melbourne and Vancouver                                                                   | 2 |  |  |  |  | 2 |
| Disease burden of extreme treatment anxiety                                                                                                                   | 2 |  |  |  |  | 2 |
| Disparities in dental health among school children in the city of Stuttgart]                                                                                  | 2 |  |  |  |  | 2 |
| Disparities in dental insurance coverage among hospitalised Western Australian children                                                                       | 2 |  |  |  |  | 2 |
| Diversity of dental patterns: application on different ages using the Brazilian National Oral Health Survey                                                   | 2 |  |  |  |  | 2 |
| DMFT and treatment needs in adult population of Oviedo, Spain                                                                                                 | 2 |  |  |  |  | 2 |
| Do 'poor areas' get the services they deserve? The role of dental services in structural inequalities in oral health                                          | 2 |  |  |  |  | 2 |
| Do elderly individuals with a cognitive handicap have worse oral health?]                                                                                     | 2 |  |  |  |  | 2 |
| Do health provider-patient relationships matter? Exploring dentist-patient relationships and oral health-related quality of life in older people              | 2 |  |  |  |  | 2 |

|                                                                                                                                                                               |   |  |  |  |  |   |
|-------------------------------------------------------------------------------------------------------------------------------------------------------------------------------|---|--|--|--|--|---|
| Do we need more than one Child Perceptions Questionnaire for children and adolescents?                                                                                        | 2 |  |  |  |  | 2 |
| Does concern about halitosis influence individual's oral hygiene practices?                                                                                                   | 2 |  |  |  |  | 2 |
| Does dental appearance impact on employability in adults? A scoping review of quantitative and qualitative evidence                                                           | 2 |  |  |  |  | 2 |
| Does dental disease presence equate to treatment need among care home residents?                                                                                              | 2 |  |  |  |  | 2 |
| Does dental indifference influence the oral health-related quality of life of prisoners?                                                                                      | 2 |  |  |  |  | 2 |
| Does Medicaid improve utilization of medical and dental services and health outcomes for Medicaid-eligible children in the United States?                                     | 2 |  |  |  |  | 2 |
| Down syndrome and neurofibromatosis: a case report                                                                                                                            | 2 |  |  |  |  | 2 |
| Dual institution validation of an ageism scale for dental students                                                                                                            | 2 |  |  |  |  | 2 |
| Dynamics of the medical-dental relationship in a University Hospital in Buenos Aires, Argentina                                                                               | 2 |  |  |  |  | 2 |
| Dysphagia Rehabilitation in Japan                                                                                                                                             | 2 |  |  |  |  | 2 |
| Eating disorders in women's oral health                                                                                                                                       | 2 |  |  |  |  | 2 |
| Economic evaluations in water-fluoridation: a scoping review                                                                                                                  | 2 |  |  |  |  | 2 |
| Ecstasy (MDMA) and oral health                                                                                                                                                | 2 |  |  |  |  | 2 |
| Edema and gingival bleeding in anterior region have a negative influence on quality of life of adolescents                                                                    | 2 |  |  |  |  | 2 |
| Education for specialization in prosthodontics in Switzerland and the role of EPA                                                                                             | 2 |  |  |  |  | 2 |
| Education-related inequality in restorative dental treatment need over 11 years in two areas of Finland                                                                       | 2 |  |  |  |  | 2 |
| Effect of 'Perceived control' in management of anxious patients undergoing endodontic therapy by use of an electronic communication system                                    | 2 |  |  |  |  | 2 |
| Effect of awards after dental care in children's motivation                                                                                                                   | 2 |  |  |  |  | 2 |
| Effect of Copayment on Dental Visits: A Regression Discontinuity Analysis                                                                                                     | 2 |  |  |  |  | 2 |
| Effect of Edentulism and Oral Quality of Life on Sexual Functions in Men: A Cohort Prospective Study                                                                          | 2 |  |  |  |  | 2 |
| Effect of fear on dental utilization behaviors and oral health outcome                                                                                                        | 2 |  |  |  |  | 2 |
| Effect of Loss of Teeth and its Association with General Quality of Life using Geriatric Oral Health Assessment Index (Gohai) among Older Individuals Residing in Rural Areas | 2 |  |  |  |  | 2 |
| Effect of oral health education and fluoridated dentifrices on the oral health status of visually impaired children                                                           | 2 |  |  |  |  | 2 |
| Effect of periodontal treatment on oral anticoagulation in patients with heart disease                                                                                        | 2 |  |  |  |  | 2 |
| Effect of planned dental treatment on the state of the dentition in workers of Lublin printing plants according to certain indices]                                           | 2 |  |  |  |  | 2 |
| Effect of the aetiology and severity of liver disease on oral health and dental treatment prior to transplantation                                                            | 2 |  |  |  |  | 2 |
| Effect of treatment with fixed and removable dental prostheses. An oral health-related quality of life study                                                                  | 2 |  |  |  |  | 2 |
| Effectiveness of a dental care intervention in the prevention of lower respiratory tract nosocomial infections among intensive care patients: a randomized clinical trial     | 2 |  |  |  |  | 2 |
| Effectiveness of a dental care intervention in the prevention of lower respiratory tract nosocomial infections among intensive care patients: a randomized clinical trial.    | 2 |  |  |  |  | 2 |
| Effectiveness of an oral hygiene program for Brazilian orphans                                                                                                                | 2 |  |  |  |  | 2 |
| Effectiveness of antifungal agents for oral candidiasis in inpatients]                                                                                                        | 2 |  |  |  |  | 2 |

|                                                                                                                                                                             |   |  |  |  |  |   |
|-----------------------------------------------------------------------------------------------------------------------------------------------------------------------------|---|--|--|--|--|---|
| Effectiveness of Bubble Breath Play Therapy in the Dental Management of Anxious Children: A Pilot Study                                                                     | 2 |  |  |  |  | 2 |
| Effectiveness of Distraction Techniques in Managing Pediatric Dental Patients                                                                                               | 2 |  |  |  |  | 2 |
| Effectiveness of oral midazolam for paediatric dental care: a retrospective study in two specialist centres                                                                 | 2 |  |  |  |  | 2 |
| Effectiveness of professional oral health care intervention on the oral health of residents with dementia in residential aged care facilities: a systematic review protocol | 2 |  |  |  |  | 2 |
| Effectiveness of two physical therapy interventions, relative to dental treatment in individuals with bruxism: study protocol of a randomized clinical trial                | 2 |  |  |  |  | 2 |
| Effects of a combination of non-pharmaceutical psychological interventions on dental anxiety                                                                                | 2 |  |  |  |  | 2 |
| Effects of cocaine use on oral health and implications for dental treatment]                                                                                                | 2 |  |  |  |  | 2 |
| Effects of dental rehabilitation under general anesthesia on children's oral health-related quality of life using proxy short versions of OHRQoL instruments                | 2 |  |  |  |  | 2 |
| Effects of Dental Rehabilitation under General Anesthesia on Children's Oral-Health-Related Quality of Life: Saudi Arabian Parents' Perspectives                            | 2 |  |  |  |  | 2 |
| Effects of dental treatment and systemic disease on oral health-related quality of life in Korean pediatric patients                                                        | 2 |  |  |  |  | 2 |
| Effects of dental treatment on the quality of life and activities of daily living in institutionalized elderly in Japan                                                     | 2 |  |  |  |  | 2 |
| Effects of dropping out of dental treatment on the oral health-related quality of life among middle-aged subjects using web research                                        | 2 |  |  |  |  | 2 |
| Effects of Familial Characteristics on Dental Fear: A Cross-sectional Study                                                                                                 | 2 |  |  |  |  | 2 |
| Effects of income and dental insurance coverage on need for dental care in Canada                                                                                           | 2 |  |  |  |  | 2 |
| Effects of the Recent Medicaid Expansions on Dental Preventive Services and Treatments                                                                                      | 2 |  |  |  |  | 2 |
| Elderly patient's knowledge, attitudes and behaviors regarding care and maintenance of the removable prosthesis: a qualitative study                                        | 2 |  |  |  |  | 2 |
| Embarrassing Realities: the Portrayal of Dentistry in Reality TV 'Dentertainment'                                                                                           | 2 |  |  |  |  | 2 |
| Emergency Management in a Dental Clinic During the Coronavirus Disease 2019 (COVID-19) Epidemic in Beijing                                                                  | 2 |  |  |  |  | 2 |
| Emergency room visits for dental problems among working poor Canadians                                                                                                      | 2 |  |  |  |  | 2 |
| Enabling people with severe mental illness to overcome barriers to access dental treatment: a qualitative study applying COM-B framework analysis                           | 2 |  |  |  |  | 2 |
| Entrustable Professional Activities in Oral Health for Primary Care Providers Based on a Scoping Review                                                                     | 2 |  |  |  |  | 2 |
| Environmental interventions to reduce the consumption of sugar-sweetened beverages and their effects on health                                                              | 2 |  |  |  |  | 2 |
| Epidemiological Investigation of OHCWs with COVID-19                                                                                                                        | 2 |  |  |  |  | 2 |
| Epidemiological investigation of oral health in a group of Prague University students]                                                                                      | 2 |  |  |  |  | 2 |
| Epidemiological study of oral dental health of 4-year-old children in french nursery schools]                                                                               | 2 |  |  |  |  | 2 |
| Epidermolysis bullosa: oral manifestations and their treatments]                                                                                                            | 2 |  |  |  |  | 2 |
| Epilepsy and oral care                                                                                                                                                      | 2 |  |  |  |  | 2 |

|                                                                                                                                                          |   |  |  |  |  |   |
|----------------------------------------------------------------------------------------------------------------------------------------------------------|---|--|--|--|--|---|
| Equitable access to dental care for an at-risk group: a review of services for Australian refugees                                                       | 2 |  |  |  |  | 2 |
| Estimated cost of dental treatment for active duty and recruit U.S. military personnel                                                                   | 2 |  |  |  |  | 2 |
| Estimates of time and propensity for dental treatment among institutionalised elders                                                                     | 2 |  |  |  |  | 2 |
| Estimating dental treatment needs among American Indians and Alaska Natives                                                                              | 2 |  |  |  |  | 2 |
| Estimation of Dental Anxiety Levels Before and After Dental Visit in Children with Visual Impairment Using Modified Dental Anxiety Scale in Braille Text | 2 |  |  |  |  | 2 |
| Ethics, research and HIV: lessons learned- a workshop report                                                                                             | 2 |  |  |  |  | 2 |
| Ethnic and socioeconomic inequalities in dental treatment at a school of dentistry                                                                       | 2 |  |  |  |  | 2 |
| Evaluating awareness regarding oral hygiene practices and exploring gender differences among patients attending for oral prophylaxis                     | 2 |  |  |  |  | 2 |
| Evaluating dental status and prosthetic need in relation to medical findings in Greek patients suffering from idiopathic Parkinson's disease             | 2 |  |  |  |  | 2 |
| Evaluating factors associated with fear and anxiety to dental treatment-A systematic review                                                              | 2 |  |  |  |  | 2 |
| Evaluating the Relationship of Dental Fear with Dental Health Status and Awareness                                                                       | 2 |  |  |  |  | 2 |
| Evaluation of a community dental clinic providing care to people experiencing homelessness: A mixed methods approach                                     | 2 |  |  |  |  | 2 |
| Evaluation of a community-based dental screening program prior to radiotherapy for head and neck cancer: a single-center experience                      | 2 |  |  |  |  | 2 |
| Evaluation of a modified version of the index of Oral Impacts On Daily Performances (OIDP) in elderly populations in two European countries              | 2 |  |  |  |  | 2 |
| Evaluation of an oral health education program for nursing personnel in special housing facilities for the elderly. Part II: Clinical aspects            | 2 |  |  |  |  | 2 |
| Evaluation of anxiety levels and their characteristics in dental care: Cross-sectional study                                                             | 2 |  |  |  |  | 2 |
| Evaluation of children's pain expression and behavior using audio visual distraction                                                                     | 2 |  |  |  |  | 2 |
| Evaluation of demands and needs for dental care in a sample of the Turkish population                                                                    | 2 |  |  |  |  | 2 |
| Evaluation of Dental Fear and Anxiety in Displaced Persons in Bosnia and Herzegovina                                                                     | 2 |  |  |  |  | 2 |
| Evaluation of Dental Status of Adolescents at Kuwait University Dental Clinic                                                                            | 2 |  |  |  |  | 2 |
| Evaluation of Gynecologists' Awareness About Oral Health Condition During Pregnancy in Chennai City                                                      | 2 |  |  |  |  | 2 |
| Evaluation of NHS dental uptake by nursing mothers for local authorities throughout England in 2016-2018                                                 | 2 |  |  |  |  | 2 |
| Evaluation of oral cavity condition with regard to decay in 18-year old from urban and rural areas in Podkarpackie Province, Poland                      | 2 |  |  |  |  | 2 |
| Evaluation of oral health status of children in pretreatment and after treatment for 18 month                                                            | 2 |  |  |  |  | 2 |
| Evaluation of Patient's Knowledge, Attitude, and Practice of Cross-Infection Control in Dentistry during COVID-19 Pandemic                               | 2 |  |  |  |  | 2 |
| Evaluation of patients with Alzheimer's disease before and after dental treatment                                                                        | 2 |  |  |  |  | 2 |
| Evaluation of secondary care in endodontics at a Dental Specialties Center (DSC)                                                                         | 2 |  |  |  |  | 2 |

|                                                                                                                                                                                                                             |   |  |  |  |  |   |
|-----------------------------------------------------------------------------------------------------------------------------------------------------------------------------------------------------------------------------|---|--|--|--|--|---|
| Evaluation of the effects of different forms of periodontal diseases on quality of life with OHIP-14 and SF-36 questionnaires: A cross-sectional study                                                                      | 2 |  |  |  |  | 2 |
| Evaluation of the impact of orthognathic surgery on quality of life                                                                                                                                                         | 2 |  |  |  |  | 2 |
| Evaluation of the Jönköping dental fear coping model: a patient perspective                                                                                                                                                 | 2 |  |  |  |  | 2 |
| Evaluation of the medical history                                                                                                                                                                                           | 2 |  |  |  |  | 2 |
| Evaluation of the oral health status in Chinese hemodialysis patients                                                                                                                                                       | 2 |  |  |  |  | 2 |
| Evaluation of the preventive and therapeutic programme implementation "Let's take care of a healthy smile" among 17- and 18-year-old adolescents in the city of Skierniewice in 2018                                        | 2 |  |  |  |  | 2 |
| Everybody brush!": protocol for a parallel-group randomized controlled trial of a family-focused primary prevention program with distribution of oral hygiene products and education to increase frequency of toothbrushing | 2 |  |  |  |  | 2 |
| Evidence lacking to determine whether preoperative analgesic use reduces post dental treatment pain for children                                                                                                            | 2 |  |  |  |  | 2 |
| Evidence-based dental management in the new era of sickle cell disease: A scoping review                                                                                                                                    | 2 |  |  |  |  | 2 |
| Evolution of oral health in oral cancer patients with and without dental treatment in place: Before, during and after cancer treatment                                                                                      | 2 |  |  |  |  | 2 |
| Exclusive Breastfeeding and Risk of Dental Malocclusion                                                                                                                                                                     | 2 |  |  |  |  | 2 |
| Expenditures for dental care in Greece. Comparison with other countries]                                                                                                                                                    | 2 |  |  |  |  | 2 |
| Experiential learning for children's dental anxiety: a cluster randomized trial                                                                                                                                             | 2 |  |  |  |  | 2 |
| Exploring associations between adverse childhood experiences and oral health among children and adolescents                                                                                                                 | 2 |  |  |  |  | 2 |
| Exploring Oral Health Beliefs and Behaviour Among Tibetan Immigrants of Bylakkupe                                                                                                                                           | 2 |  |  |  |  | 2 |
| Exploring the educational opportunity and implementation of CARE among dental students in India                                                                                                                             | 2 |  |  |  |  | 2 |
| Exploring the feasibility of using routinely collected data to produce antibiotic prescribing profiles for general dental practitioners in Wales                                                                            | 2 |  |  |  |  | 2 |
| Exploring the oral health experiences of homeless people: a deconstruction-reconstruction formulation                                                                                                                       | 2 |  |  |  |  | 2 |
| Extent of Awareness Regarding Oral Health and Dental Treatment Needs among Individuals with Hearing and Speech Impairments in Saudi Arabia                                                                                  | 2 |  |  |  |  | 2 |
| Factors Affecting Preventive Dental Treatment of Adolescents in Korea                                                                                                                                                       | 2 |  |  |  |  | 2 |
| Factors associated to self perceived need of dental care among Brazilian elderly]                                                                                                                                           | 2 |  |  |  |  | 2 |
| Factors associated with agreement between self-perception and clinical evaluation of dental treatment needs in adults in Brazil and Minas Gerais                                                                            | 2 |  |  |  |  | 2 |
| Factors associated with Brazilian adolescents' satisfaction with oral health                                                                                                                                                | 2 |  |  |  |  | 2 |
| Factors associated with dental attendance among adolescents in Santiago, Chile                                                                                                                                              | 2 |  |  |  |  | 2 |
| Factors associated with different measures of dental fear among children at different ages                                                                                                                                  | 2 |  |  |  |  | 2 |
| Factors associated with discontinuation and resumption of implant maintenance therapy                                                                                                                                       | 2 |  |  |  |  | 2 |
| Factors associated with older adults' need for oral hygiene management by dental professionals                                                                                                                              | 2 |  |  |  |  | 2 |

|                                                                                                                                                                              |   |  |  |  |  |   |
|------------------------------------------------------------------------------------------------------------------------------------------------------------------------------|---|--|--|--|--|---|
| Factors associated with oral health-related quality of life in community-dwelling elderly persons with disabilities                                                          | 2 |  |  |  |  | 2 |
| Factors associated with parents' and adolescents' perceptions of oral health and need for dental treatment                                                                   | 2 |  |  |  |  | 2 |
| Factors associated with receipt of preventive dental treatment procedures among adult patients at a dental training school in Wisconsin, 2001-2002                           | 2 |  |  |  |  | 2 |
| Factors associated with satisfaction with dental services among the elderly]                                                                                                 | 2 |  |  |  |  | 2 |
| Factors associated with subjective need for dental treatment in elderly Brazilians]                                                                                          | 2 |  |  |  |  | 2 |
| Factors associated with the need for oral treatment of elderly Brazilians: a multilevel analysis]                                                                            | 2 |  |  |  |  | 2 |
| Factors associated with the needs of specialised dental treatment among adults aged 35-44 years old in the state of Minas Gerais, Brazil: a multilevel cross-sectional study | 2 |  |  |  |  | 2 |
| Factors associated with the oral health-related quality of life in elderly persons in dental clinic: validation of a Mandarin Chinese version of GOHAI                       | 2 |  |  |  |  | 2 |
| Factors associated with the use of dental services by elderly Brazilians]                                                                                                    | 2 |  |  |  |  | 2 |
| Factors associated with toothache among Brazilian adults: a multilevel analysis                                                                                              | 2 |  |  |  |  | 2 |
| Factors associated with uncooperative behavior by Brazilian preschool children in the dental office                                                                          | 2 |  |  |  |  | 2 |
| Factors associated with use of oral health services: a population-based study in municipalities of the state of Maranhão, Brazil]                                            | 2 |  |  |  |  | 2 |
| Factors behind self-perceived need for dental treatment and prosthesis in Brazilian elderly people]                                                                          | 2 |  |  |  |  | 2 |
| Factors influencing awareness and attendance of traditional oral health care practices by residents of a peri-urban community in Ibadan, Nigeria                             | 2 |  |  |  |  | 2 |
| Factors influencing choice of dental treatment by private general practitioners                                                                                              | 2 |  |  |  |  | 2 |
| Factors influencing oral health in long term care facilities                                                                                                                 | 2 |  |  |  |  | 2 |
| Factors influencing the impact of oral health on the daily activities of adolescents, adults and older adults                                                                | 2 |  |  |  |  | 2 |
| Factors influencing use of dental services in rural and urban communities: considerations for practitioners in underserved areas                                             | 2 |  |  |  |  | 2 |
| Factors related to acceptance of dental treatment services in a nursing home population                                                                                      | 2 |  |  |  |  | 2 |
| Factors related to number of present teeth in Korean elderly adults aged 55-84 years                                                                                         | 2 |  |  |  |  | 2 |
| Factors related to poor self-perceived oral health among community-dwelling elderly individuals in São Paulo, Brazil                                                         | 2 |  |  |  |  | 2 |
| Factors related to receipt of dental care in Eastern Iowa nursing facilities                                                                                                 | 2 |  |  |  |  | 2 |
| Factors that affect patient attitudes toward infection control measures                                                                                                      | 2 |  |  |  |  | 2 |
| Factors to consider when treatment planning for patients seeking comprehensive aesthetic dental treatment                                                                    | 2 |  |  |  |  | 2 |
| Falling through the gap: Dental treatment experiences of patients affected by cleft lip and/or palate                                                                        | 2 |  |  |  |  | 2 |
| Family member and guardian acceptance of dental services for nursing home residents                                                                                          | 2 |  |  |  |  | 2 |
| Fear of dental treatment and its possible effects on oral health                                                                                                             | 2 |  |  |  |  | 2 |
| Fear of dental treatment. Prevalence and characteristics among adult Danes]                                                                                                  | 2 |  |  |  |  | 2 |

|                                                                                                                                                    |   |  |  |  |  |   |
|----------------------------------------------------------------------------------------------------------------------------------------------------|---|--|--|--|--|---|
| Five years' follow-up of dental fear and anxiety, experience of dental care and oral health behaviour in Swedish preterm and full-term adolescents | 2 |  |  |  |  | 2 |
| From public mental health to community oral health: the impact of dental anxiety and fear on dental status                                         | 2 |  |  |  |  | 2 |
| Frontonasal dysplasia: oral features, restorative and orthodontic dental treatment in a child                                                      | 2 |  |  |  |  | 2 |
| Full-mouth rehabilitation of a patient with ectodermal dysplasia with dental implants                                                              | 2 |  |  |  |  | 2 |
| Future demands for dental manpower in Japan. 3. Survey of public attitudes toward dental treatment and knowledge of dental health]                 | 2 |  |  |  |  | 2 |
| Gagging and its associations with dental care-related fear, fear of pain and beliefs about treatment                                               | 2 |  |  |  |  | 2 |
| Gender differences in special needs populations                                                                                                    | 2 |  |  |  |  | 2 |
| Gender issues and oral health in elderly Indians                                                                                                   | 2 |  |  |  |  | 2 |
| Gender-related preferences in the choice of methods for aesthetic and functional rehabilitation in dentistry]                                      | 2 |  |  |  |  | 2 |
| General and oral health implications of cannabis use                                                                                               | 2 |  |  |  |  | 2 |
| General anesthesia protocol for the dental patient: emphasis for older adults                                                                      | 2 |  |  |  |  | 2 |
| General health and oral health status in elderly dental patients in Isparta, Turkey                                                                | 2 |  |  |  |  | 2 |
| General health, dental status and perceived dental treatment needs of an elderly population in Istanbul                                            | 2 |  |  |  |  | 2 |
| Geographic location and indirect costs as a barrier to dental treatment: a patient perspective                                                     | 2 |  |  |  |  | 2 |
| Geriatric dentistry                                                                                                                                | 2 |  |  |  |  | 2 |
| Geriatric dentistry--meet the need                                                                                                                 | 2 |  |  |  |  | 2 |
| Geriatric dentistry: a new specialty in Brazil                                                                                                     | 2 |  |  |  |  | 2 |
| Geriatric oral health issues in Germany                                                                                                            | 2 |  |  |  |  | 2 |
| Geriatric prosthodontic care                                                                                                                       | 2 |  |  |  |  | 2 |
| Gerodontic nutrition and dietary counseling for prosthodontic patients                                                                             | 2 |  |  |  |  | 2 |
| Giving Children a Voice About Their Dental Care                                                                                                    | 2 |  |  |  |  | 2 |
| Global self-rating of oral health as summary tool for oral health evaluation in low-resource settings                                              | 2 |  |  |  |  | 2 |
| Global Tourist Guide to Oral Care - A Systematic Review                                                                                            | 2 |  |  |  |  | 2 |
| Good teeth, bad teeth and fear of the dentist                                                                                                      | 2 |  |  |  |  | 2 |
| Grand challenges in dental informatics                                                                                                             | 2 |  |  |  |  | 2 |
| Green Teeth Related to Bilirubin Levels                                                                                                            | 2 |  |  |  |  | 2 |
| Guidance for the planning                                                                                                                          | 2 |  |  |  |  | 2 |
| Guidance for the planning, implementation and evaluation of oral health care demonstration projects for under-served populations                   | 2 |  |  |  |  | 2 |
| Gynecologists' knowledge and attitudes regarding oral health and periodontal disease leading to adverse pregnancy outcomes                         | 2 |  |  |  |  | 2 |
| HCV infection: aspects of epidemiology and transmission relevant to oral health care workers                                                       | 2 |  |  |  |  | 2 |
| Health benefits of saliva: a review                                                                                                                | 2 |  |  |  |  | 2 |
| Health consciousness and oral hygiene of the aged in homes and hostels]                                                                            | 2 |  |  |  |  | 2 |
| Health gain from restorative dental treatment evaluated by computer simulation                                                                     | 2 |  |  |  |  | 2 |
| Health personnel and dental health. Visits to the dentist and attitudes to dental care in a group of health personnel]                             | 2 |  |  |  |  | 2 |
| Health promotion initiatives: An experience of a Well Women's Clinic                                                                               | 2 |  |  |  |  | 2 |

|                                                                                                                                                                                               |   |  |  |  |  |   |
|-----------------------------------------------------------------------------------------------------------------------------------------------------------------------------------------------|---|--|--|--|--|---|
| Health promotion training in dental and oral health degrees: a scoping review                                                                                                                 | 2 |  |  |  |  | 2 |
| Health services and women's oral health                                                                                                                                                       | 2 |  |  |  |  | 2 |
| Healthy Smiles Healthy Growth 2004--basic screening survey of migrant and seasonal farmworker children in Illinois                                                                            | 2 |  |  |  |  | 2 |
| Hemophilia and dental treatment                                                                                                                                                               | 2 |  |  |  |  | 2 |
| Hemophilia and oral health                                                                                                                                                                    | 2 |  |  |  |  | 2 |
| Hepatic abscess linked to oral actinomycetes: a case report                                                                                                                                   | 2 |  |  |  |  | 2 |
| High educational attainment moderates the association between dental health-care supply and utilization in Europe                                                                             | 2 |  |  |  |  | 2 |
| High prevalence of cardiovascular diseases among other medically compromised conditions in dental patients: A retrospective study                                                             | 2 |  |  |  |  | 2 |
| High Prevalence of Orodental Disorders in South Brazilian Cart Horses: Walking a Tightrope Between Animal Welfare and Socioeconomic Inevitability                                             | 2 |  |  |  |  | 2 |
| Hipomineralização de molar-incisivo (HMI): relato de caso e acompanhamento de tratamento restaurador/ Molar incisor hypomineralization (MIH): case report and restorative treatment follow-up | 2 |  |  |  |  | 2 |
| HIV infection and dental care: views and experiences among HIV-seropositive patients                                                                                                          | 2 |  |  |  |  | 2 |
| HIV infection in children: a challenge to dental practice                                                                                                                                     | 2 |  |  |  |  | 2 |
| HIV-1 impact on oral health-related quality of life: a cross-sectional study                                                                                                                  | 2 |  |  |  |  | 2 |
| Holistic approach of a child with cystic fibrosis: a case report                                                                                                                              | 2 |  |  |  |  | 2 |
| Homosexual and bisexual men's perceptions of discrimination in health services                                                                                                                | 2 |  |  |  |  | 2 |
| Household survey of access to and utilisation of emergency oral health care services in rural Tanzania                                                                                        | 2 |  |  |  |  | 2 |
| How does the social "get under the gums"? The role of socio-economic position in the oral-systemic health link                                                                                | 2 |  |  |  |  | 2 |
| How effective and cost-effective is water fluoridation for adults? Protocol for a 10-year retrospective cohort study                                                                          | 2 |  |  |  |  | 2 |
| How families prepare their children for tooth extraction under general anaesthesia: Family and clinical predictors of non-compliance with a 'serious game'                                    | 2 |  |  |  |  | 2 |
| How health professionals perceive and experience treating people on social assistance: a qualitative study among dentists in Montreal, Canada                                                 | 2 |  |  |  |  | 2 |
| How income, employment, insurance affect older Americans' dental care                                                                                                                         | 2 |  |  |  |  | 2 |
| How the dental treatment for medically complicated patients can be improved]                                                                                                                  | 2 |  |  |  |  | 2 |
| Hypertension among dental patients attending tertiary health institution in Edo State, Nigeria                                                                                                | 2 |  |  |  |  | 2 |
| Hypertension in children: an overview                                                                                                                                                         | 2 |  |  |  |  | 2 |
| Hypnosis for children undergoing dental treatment                                                                                                                                             | 2 |  |  |  |  | 2 |
| I have been refused to be treated by three dentists": Barriers to patient care                                                                                                                | 2 |  |  |  |  | 2 |
| Identification and appraisal of outcome measures used to evaluate hypodontia care: A systematic review                                                                                        | 2 |  |  |  |  | 2 |
| Identification and treatment of the geriatric alcoholic dental patient                                                                                                                        | 2 |  |  |  |  | 2 |
| Identification of barriers and beliefs influencing engagement by adult and teen Mexican-Americans in oral health behaviors                                                                    | 2 |  |  |  |  | 2 |
| Identification of medically compromised dental patients in a Portuguese population                                                                                                            | 2 |  |  |  |  | 2 |
| Illicit drug use and oral health                                                                                                                                                              | 2 |  |  |  |  | 2 |

|                                                                                                                                                                                                  |   |  |  |  |  |   |
|--------------------------------------------------------------------------------------------------------------------------------------------------------------------------------------------------|---|--|--|--|--|---|
| Illuminating Mexican Migrant Adolescents' Dental Access and Utilization Experiences                                                                                                              | 2 |  |  |  |  | 2 |
| Impact of aesthetic restorative treatment on anterior teeth with fluorosis among residents of an endemic area in Brazil: intervention study                                                      | 2 |  |  |  |  | 2 |
| Impact of dental emergencies on combat readiness in Croatian Army]                                                                                                                               | 2 |  |  |  |  | 2 |
| Impact of dental treatment and the severity of traumatic dental injuries on the quality of life of Brazilian schoolchildren                                                                      | 2 |  |  |  |  | 2 |
| Impact of dental treatment under general anesthesia on the oral health-related quality of life of adolescents and adults with special needs                                                      | 2 |  |  |  |  | 2 |
| IMPACT OF FLUORIDE ON DENTAL HEALTH QUALITY                                                                                                                                                      | 2 |  |  |  |  | 2 |
| Impact of General and Oral Complications of Diabetes Mellitus Type I on Lebanese Children's Quality of Life                                                                                      | 2 |  |  |  |  | 2 |
| Impact of Malocclusion on the Quality of Life of Brazilian Adolescents: A Population-Based Study                                                                                                 | 2 |  |  |  |  | 2 |
| Impact of oral health on physical and psychosocial dimensions: an analysis using structural equation modeling                                                                                    | 2 |  |  |  |  | 2 |
| Impact of oral health on the quality of life of 3-6-years old HIV-infected children. Quality of life in HIV+ children                                                                            | 2 |  |  |  |  | 2 |
| Impact of sense of coherence on oral health-related quality of life among Brazilian adults                                                                                                       | 2 |  |  |  |  | 2 |
| Impact of visual instruction on oral hygiene status of children with hearing impairment                                                                                                          | 2 |  |  |  |  | 2 |
| Impacts of health of users with HIV/AIDS in a specialized service                                                                                                                                | 2 |  |  |  |  | 2 |
| Implications of access, utilization and need for oral health care by the non-institutionalized and institutionalized elderly on the dental delivery system                                       | 2 |  |  |  |  | 2 |
| Importance of oral health and dental treatment in organ transplant recipients                                                                                                                    | 2 |  |  |  |  | 2 |
| Importance of proper implementation of the case history in the prevention of stomatological diseases]                                                                                            | 2 |  |  |  |  | 2 |
| Improvement of oral health care in geriatric care by training of nurses and nursing assistants for the elderly]                                                                                  | 2 |  |  |  |  | 2 |
| Improving and maintaining oral health for people with special needs                                                                                                                              | 2 |  |  |  |  | 2 |
| Improving oral health outcomes from pregnancy through infancy                                                                                                                                    | 2 |  |  |  |  | 2 |
| Improving oral health through understanding the meaning of health and disease in a Chinese culture                                                                                               | 2 |  |  |  |  | 2 |
| Improving the oral health of frail and functionally dependent elderly                                                                                                                            | 2 |  |  |  |  | 2 |
| Inclusive Dentistry: Integral Management of Pediatric Patients with Intellectual Disability and/or Communication Impairments. Case-Series Reports                                                | 2 |  |  |  |  | 2 |
| Income-related inequalities in dental service utilization by Europeans aged 50+                                                                                                                  | 2 |  |  |  |  | 2 |
| Increasing dependency of older people in nursing homes is associated with need for dental treatments                                                                                             | 2 |  |  |  |  | 2 |
| Increasing hygiene productivity                                                                                                                                                                  | 2 |  |  |  |  | 2 |
| Increasing popularity of waterpipe tobacco smoking and electronic cigarette use: Implications for oral healthcare                                                                                | 2 |  |  |  |  | 2 |
| Independent dental patient consultation service--experiences of the information center for the Rhine-Neckar district]                                                                            | 2 |  |  |  |  | 2 |
| Individual and contextual factors associated with traumatic dental injuries in a population of Brazilian adolescents                                                                             | 2 |  |  |  |  | 2 |
| Inequalities in access to and utilization of dental care in Brazil: an analysis of the Telephone Survey Surveillance System for Risk and Protective Factors for Chronic Diseases (VIGITEL 2009)] | 2 |  |  |  |  | 2 |
| Inequalities in self-rated oral health in adults                                                                                                                                                 | 2 |  |  |  |  | 2 |

|                                                                                                                                                                 |   |  |  |  |  |   |
|-----------------------------------------------------------------------------------------------------------------------------------------------------------------|---|--|--|--|--|---|
| Inequalities in treatment planning for children with intellectual disabilities: A questionnaire study of dentists in Europe                                     | 2 |  |  |  |  | 2 |
| Inequality in unmet dental care needs among South Korean adults                                                                                                 | 2 |  |  |  |  | 2 |
| Inequity in access to dental care services explains current socioeconomic disparities in oral health: the Swedish National Surveys of Public Health 2004-2005   | 2 |  |  |  |  | 2 |
| Infection control in North American dental schools                                                                                                              | 2 |  |  |  |  | 2 |
| Influence of maternal anxiety on child anxiety during dental care: cross-sectional study                                                                        | 2 |  |  |  |  | 2 |
| Influence of negative dental experiences in childhood on the development of dental fear in adulthood: a case-control study                                      | 2 |  |  |  |  | 2 |
| Influence of oral health on combat readiness in the Croatian army                                                                                               | 2 |  |  |  |  | 2 |
| Influence of the dental prosthetic status on self-perceptions of health and treatment needs: A cross-sectional study of middle-aged adults with chronic disease | 2 |  |  |  |  | 2 |
| Influence of tobacco on dental and oral diseases]                                                                                                               | 2 |  |  |  |  | 2 |
| Informed consumer or unlucky visitor? A profile of German patients who received dental services abroad                                                          | 2 |  |  |  |  | 2 |
| Inherited epidermolysis bullosa: an update and suggested dental care considerations                                                                             | 2 |  |  |  |  | 2 |
| Inherited, congenital and acquired disorders by hemostasis (vascular, platelet & plasmatic phases) with repercussions in the therapeutic oral sphere            | 2 |  |  |  |  | 2 |
| Insufficient evidence to understand effect of routine scaling and polishing                                                                                     | 2 |  |  |  |  | 2 |
| Integrating behavioral and pharmacological therapeutic modalities                                                                                               | 2 |  |  |  |  | 2 |
| Integrating child dental care at Community Smiles: the director's goals fulfilled...                                                                            | 2 |  |  |  |  | 2 |
| Intellectual disability and impact on oral health: a paired study                                                                                               | 2 |  |  |  |  | 2 |
| Intensive smoking-cessation intervention in the dental setting                                                                                                  | 2 |  |  |  |  | 2 |
| Inter-professional conflict and professionalization: dentistry and dental hygiene in Ontario                                                                    | 2 |  |  |  |  | 2 |
| Interaction of dental treatment anxiety and oral health]                                                                                                        | 2 |  |  |  |  | 2 |
| Interdisciplinarity in oro-maxillofacial dysmorphism rehabilitation of a patient with Turner syndrome. A clinical case report                                   | 2 |  |  |  |  | 2 |
| Interpreting the medical history                                                                                                                                | 2 |  |  |  |  | 2 |
| Interrater reliability and concurrent validity of oral/dental items in the resident assessment instrument minimum data set 2.0                                  | 2 |  |  |  |  | 2 |
| Interventions for edentate elders--what is the evidence?                                                                                                        | 2 |  |  |  |  | 2 |
| Interventions for increasing acceptance of local anaesthetic in children and adolescents having dental treatment                                                | 2 |  |  |  |  | 2 |
| Interventions to reduce contaminated aerosols produced during dental procedures for preventing infectious diseases                                              | 2 |  |  |  |  | 2 |
| Intestinal failure and home parenteral nutrition: implications for oral health and dental care                                                                  | 2 |  |  |  |  | 2 |
| Intraoperative local anaesthesia for reduction of postoperative pain following general anaesthesia for dental treatment in children and adolescents             | 2 |  |  |  |  | 2 |
| Intravenous sedation for dental patients with intellectual disability                                                                                           | 2 |  |  |  |  | 2 |
| Introduction of Prenatal Oral Health into Medical Students' Obstetrics Training                                                                                 | 2 |  |  |  |  | 2 |
| Introduction to Kampo medicine for dental treatment - Oral pharmacotherapy that utilizes the advantages of Western and Kampo medicines                          | 2 |  |  |  |  | 2 |
| Invading Deeply into Self and Everyday Life: How Oral Health-Related Problems Affect the Lives of Child Sexual Abuse Survivors                                  | 2 |  |  |  |  | 2 |
| Invasive Dental Treatment and Risk for a First Myocardial Infarction                                                                                            | 2 |  |  |  |  | 2 |

|                                                                                                                                                                                       |   |  |  |  |  |   |
|---------------------------------------------------------------------------------------------------------------------------------------------------------------------------------------|---|--|--|--|--|---|
| Investigation of the oral health needs for homeless people in specialist units in London, Cardiff, Glasgow and Birmingham                                                             | 2 |  |  |  |  | 2 |
| Involving patients in treatment decisions - a delicate balancing act for Swedish dentists                                                                                             | 2 |  |  |  |  | 2 |
| Is access to paediatric dental general anaesthesia by need or by postcode?                                                                                                            | 2 |  |  |  |  | 2 |
| Is dental general anaesthesia in children an outdated concept? A retrospective analysis                                                                                               | 2 |  |  |  |  | 2 |
| Is dental treatment of an infected tooth a risk factor for locally invasive spread of infection?                                                                                      | 2 |  |  |  |  | 2 |
| Is it necessary to have a dentist within an intensive care unit team? Report of a randomised clinical trial                                                                           | 2 |  |  |  |  | 2 |
| Is the burden of oral diseases higher in urban disadvantaged community compared to the national prevalence?                                                                           | 2 |  |  |  |  | 2 |
| Is there a relationship of negative oral health beliefs with dental fear and anxiety regarding diverse dental patient groups? A systematic review and meta-analysis                   | 2 |  |  |  |  | 2 |
| Isolation of Enterococcus faecalis in the saliva samples of patient candidates for liver transplantation                                                                              | 2 |  |  |  |  | 2 |
| Issues in financing dental care for the elderly                                                                                                                                       | 2 |  |  |  |  | 2 |
| Knowledge and attitude of dentists towards the use of botulinum toxin and dermal fillers in dentistry, Riyadh, Saudi Arabia                                                           | 2 |  |  |  |  | 2 |
| Knowledge and attitude of Indian clinical dental students towards the dental treatment of patients with human immunodeficiency virus (HIV)/acquired immune-deficiency syndrome (AIDS) | 2 |  |  |  |  | 2 |
| Knowledge and Awareness of Primary Teeth and Their Importance among Parents in Bengaluru City, India                                                                                  | 2 |  |  |  |  | 2 |
| Knowledge of dental academics about the COVID-19 pandemic: a multi-country online survey                                                                                              | 2 |  |  |  |  | 2 |
| Knowledge, attitude and practice of mothers regarding their own and children's dental health--a tertiary care hospital based study                                                    | 2 |  |  |  |  | 2 |
| Knowledge, Attitude, and Behavior toward Evidence-based Dentistry among Dental Professionals in Jodhpur Rajasthan, India                                                              | 2 |  |  |  |  | 2 |
| Knowledge, attitude, and practice of medical doctors towards periodontal disease                                                                                                      | 2 |  |  |  |  | 2 |
| Knowledge, attitudes and status of oral health in children at risk for infective endocarditis                                                                                         | 2 |  |  |  |  | 2 |
| Knowledge, Attitudes, and Oral Health Practices of School Children in Davangere                                                                                                       | 2 |  |  |  |  | 2 |
| Knowledge, awareness, and practice among gynecologists, medical practitioners and dentists in Madurai regarding association between periodontitis and pregnancy outcomes              | 2 |  |  |  |  | 2 |
| La Estomatología ante el reto de la salud universal/ Dentistry and the challenge of universal health                                                                                  | 2 |  |  |  |  | 2 |
| Lack in Periodontal Care of Patients Suffering from Severe Heart Diseases-Results after 12 Months Follow-Up                                                                           | 2 |  |  |  |  | 2 |
| Lack of high-quality studies comparing the effectiveness                                                                                                                              | 2 |  |  |  |  | 2 |
| Lack of high-quality studies comparing the effectiveness, and cost-effectiveness, of dental auxiliaries and dentists in performing dental care                                        | 2 |  |  |  |  | 2 |
| Lay public's use of a support group for general dental problems                                                                                                                       | 2 |  |  |  |  | 2 |
| Length of tooth survival in older adults with complex medical, functional and dental backgrounds                                                                                      | 2 |  |  |  |  | 2 |
| Letter from America: UK and US state-funded dental provision                                                                                                                          | 2 |  |  |  |  | 2 |
| Lifestyle and dental attendance as predictors of oral health-related quality of life                                                                                                  | 2 |  |  |  |  | 2 |
| Limited impact of awareness-raising campaigns on hepatitis C testing practices among general practitioners                                                                            | 2 |  |  |  |  | 2 |

|                                                                                                                                                                                                               |   |  |  |  |  |   |
|---------------------------------------------------------------------------------------------------------------------------------------------------------------------------------------------------------------|---|--|--|--|--|---|
| Linguistic Adaptation and Psychometric Properties of Tamil Version of General Oral Health Assessment Index-Tml                                                                                                | 2 |  |  |  |  | 2 |
| Little childrens' reaction to dental treatment with and without parents present. Who has the responsibility?]                                                                                                 | 2 |  |  |  |  | 2 |
| Liver transplantation: dentistry is an essential part of the team                                                                                                                                             | 2 |  |  |  |  | 2 |
| Locating the source of large-scale outbreaks of foodborne disease                                                                                                                                             | 2 |  |  |  |  | 2 |
| Long-term effects on dental care behavior and dental health after treatments for dental fear                                                                                                                  | 2 |  |  |  |  | 2 |
| Long-term physical inactivity and oral health in Finnish adults with intellectual disability                                                                                                                  | 2 |  |  |  |  | 2 |
| Long-term results of dental health examinations of employees of industrial enterprises with hazardous working conditions]                                                                                     | 2 |  |  |  |  | 2 |
| Long-term results with dental treatment concepts for disabled children]                                                                                                                                       | 2 |  |  |  |  | 2 |
| Longitudinal association of adolescents' sense of coherence with tooth-brushing using an integrated behaviour change model                                                                                    | 2 |  |  |  |  | 2 |
| Maintaining confidentiality in a look-back investigation of patients treated by a HIV-infected dentist                                                                                                        | 2 |  |  |  |  | 2 |
| Making dental care possible: a mutual affair': a grounded theory relating to adult patients with dental fear and regular dental treatment                                                                     | 2 |  |  |  |  | 2 |
| Malignant disease and the delivery of dental care                                                                                                                                                             | 2 |  |  |  |  | 2 |
| Malocclusion, psycho-social impacts and treatment need: A cross-sectional study of Tanzanian primary school-children                                                                                          | 2 |  |  |  |  | 2 |
| Management and marketing for the general practice dental office                                                                                                                                               | 2 |  |  |  |  | 2 |
| Management of Diabetes in People Undergoing Dental Treatment in Primary Care                                                                                                                                  | 2 |  |  |  |  | 2 |
| Management of gag reflex for patients undergoing dental treatment                                                                                                                                             | 2 |  |  |  |  | 2 |
| Management of patients with thyroid disease: oral health considerations                                                                                                                                       | 2 |  |  |  |  | 2 |
| Management of periodontal disease in patients with diabetes- good clinical practice guidelines: A joint statement by Indian Society of Periodontology and Research Society for the Study of Diabetes in India | 2 |  |  |  |  | 2 |
| Management of the child dental patient                                                                                                                                                                        | 2 |  |  |  |  | 2 |
| Management of the crying child during dental treatment                                                                                                                                                        | 2 |  |  |  |  | 2 |
| Managing patients taking edoxaban in dentistry                                                                                                                                                                | 2 |  |  |  |  | 2 |
| Marfan syndrome: a review of the literature and case report                                                                                                                                                   | 2 |  |  |  |  | 2 |
| Masticatory ability in older individuals: A qualitative interview study                                                                                                                                       | 2 |  |  |  |  | 2 |
| Maternal and Child Nutrition and Oral Health in Urban Vietnam                                                                                                                                                 | 2 |  |  |  |  | 2 |
| Measuring Oral Health Literacy of Refugees: Associations with Dental Care Utilization and Oral Health Self-Efficacy                                                                                           | 2 |  |  |  |  | 2 |
| Measuring oral health-related quality-of-life using OHQoL-GE in periodontal patients presenting at the University of Berne, Switzerland                                                                       | 2 |  |  |  |  | 2 |
| Measuring relative opinion from location-based social media: A case study of the 2016 U.S. presidential election                                                                                              | 2 |  |  |  |  | 2 |
| Mechanical aids in the prevention of dental diseases in the elderly                                                                                                                                           | 2 |  |  |  |  | 2 |
| Medical aid according to the asylum application regulation--a report of experiences after the first year]                                                                                                     | 2 |  |  |  |  | 2 |
| Medical and functional status changes among nursing facility residents: implications for dentistry                                                                                                            | 2 |  |  |  |  | 2 |
| Medical problems and oral care of patients with Down syndrome: a literature review                                                                                                                            | 2 |  |  |  |  | 2 |
| Medically compromised conditions among Dental patients: A prospective study of the attitude of patients toward medication and medical recall visits                                                           | 2 |  |  |  |  | 2 |

|                                                                                                                                                           |   |  |  |  |  |   |
|-----------------------------------------------------------------------------------------------------------------------------------------------------------|---|--|--|--|--|---|
| Medications with dental significance: usage in a nursing home population                                                                                  | 2 |  |  |  |  | 2 |
| Methadone and oral health--a brief review                                                                                                                 | 2 |  |  |  |  | 2 |
| Methamphetamine abuse: a review of the literature and case report in a young male                                                                         | 2 |  |  |  |  | 2 |
| Methodological aspects of a computer-assisted telephone interview survey of oral health                                                                   | 2 |  |  |  |  | 2 |
| Metrics in the science of surge                                                                                                                           | 2 |  |  |  |  | 2 |
| Microbiological analysis after complete or partial removal of carious dentin using two different techniques in primary teeth: A randomized clinical trial | 2 |  |  |  |  | 2 |
| Midwives and oral health care during pregnancy: perceptions of pregnant women in south-western Sydney, Australia                                          | 2 |  |  |  |  | 2 |
| Minimising barriers to dental care in older people                                                                                                        | 2 |  |  |  |  | 2 |
| Missing teeth and lost teeth of adults aged 30 years and over in south-western Finland                                                                    | 2 |  |  |  |  | 2 |
| Modelo educativo                                                                                                                                          | 2 |  |  |  |  | 2 |
| Molar-incisor hypomineralization: an umbrella review                                                                                                      | 2 |  |  |  |  | 2 |
| Monitoring oral health and dental attendance in an outpatient psychiatric population                                                                      | 2 |  |  |  |  | 2 |
| Monitoring oral health of people in Early Intervention for Psychosis (EIP) teams: The extended Three Shires randomised trial                              | 2 |  |  |  |  | 2 |
| More than Just Pulling Teeth: The Impact of Dental Care on Patients' Lived Experiences                                                                    | 2 |  |  |  |  | 2 |
| Multiple sclerosis and oral health: an update                                                                                                             | 2 |  |  |  |  | 2 |
| Multivariate, non linear analysis of the preference for preservation of the teeth                                                                         | 2 |  |  |  |  | 2 |
| Myths, prejudices and reality about dental treatment during pregnancy. A medical opinion]                                                                 | 2 |  |  |  |  | 2 |
| National survey of oral health care in Finnish private old people's homes                                                                                 | 2 |  |  |  |  | 2 |
| Natural food mastication capability in preschool children according to their oral condition: A preliminary study                                          | 2 |  |  |  |  | 2 |
| Nature and Diffusion of COVID-19-related Oral Health Information on Chinese Social Media: Analysis of Tweets on Weibo                                     | 2 |  |  |  |  | 2 |
| Need for dental prophylaxis in grown women: an investigation in maternal rest centers. 1. Information knowledge and or oral hygiene status]               | 2 |  |  |  |  | 2 |
| Need for dental treatment following cardiac valve surgery: a clinical study                                                                               | 2 |  |  |  |  | 2 |
| Need for dental treatment in patients on the waiting list for liver and simultaneous pancreas-kidney transplant at a single center                        | 2 |  |  |  |  | 2 |
| Needs for gerodontological treatment in the elderly living in Lower Silesia                                                                               | 2 |  |  |  |  | 2 |
| No Mental Health without Oral Health                                                                                                                      | 2 |  |  |  |  | 2 |
| Noise level measurement, a new method to evaluate effectiveness of sedation in pediatric dentistry                                                        | 2 |  |  |  |  | 2 |
| Nurses' dental assessments and subsequent care in Minnesota nursing homes                                                                                 | 2 |  |  |  |  | 2 |
| Nutrient intake and dental health in school children                                                                                                      | 2 |  |  |  |  | 2 |
| Nutritional considerations and dental management of children and adolescents with HIV/AIDS                                                                | 2 |  |  |  |  | 2 |
| Obesity and oral health]                                                                                                                                  | 2 |  |  |  |  | 2 |
| Objective and subjective factors related to self-rated oral health among the elderly]                                                                     | 2 |  |  |  |  | 2 |
| Obstructive sleep apnea: diagnosis, medical management and dental implications                                                                            | 2 |  |  |  |  | 2 |
| Occlusal dysesthesia-A clinical guideline                                                                                                                 | 2 |  |  |  |  | 2 |

|                                                                                                                                                                           |   |  |  |  |  |   |
|---------------------------------------------------------------------------------------------------------------------------------------------------------------------------|---|--|--|--|--|---|
| Odontogenic infections in the etiology of infective endocarditis                                                                                                          | 2 |  |  |  |  | 2 |
| OHRQoL changes among Chinese preschool children following dental treatment under general anesthesia                                                                       | 2 |  |  |  |  | 2 |
| OHRQoL in a Sample of Alcohol and Drug Abusers                                                                                                                            | 2 |  |  |  |  | 2 |
| On adding a dental practice component to an ongoing longitudinal population-based study of oral health                                                                    | 2 |  |  |  |  | 2 |
| On oral health in children and adults with myotonic dystrophy                                                                                                             | 2 |  |  |  |  | 2 |
| One-session cognitive treatment of dental phobia: preparing dental phobics for treatment by restructuring negative cognitions                                             | 2 |  |  |  |  | 2 |
| Only limited evidence available for the effectiveness and cost effectiveness of dental auxiliaries                                                                        | 2 |  |  |  |  | 2 |
| Oral and craniofacial manifestations of multiple sclerosis: implications for the oral health care provider                                                                | 2 |  |  |  |  | 2 |
| Oral and dental care in acute lymphoblastic leukaemia: a survey of united kingdom children's cancer study group centres                                                   | 2 |  |  |  |  | 2 |
| Oral and dental considerations in pediatric cancers                                                                                                                       | 2 |  |  |  |  | 2 |
| Oral and dental discomfort--a necessary feature of old age?                                                                                                               | 2 |  |  |  |  | 2 |
| Oral and dental findings in Fanconi's anemia                                                                                                                              | 2 |  |  |  |  | 2 |
| Oral and dental health of a population of school children from the Zou region of Benin (1998)                                                                             | 2 |  |  |  |  | 2 |
| Oral and general health-related quality of life among young patients with haemophilia                                                                                     | 2 |  |  |  |  | 2 |
| Oral and nutritional status in allogeneic marrow recipients treated with T-cell depletion or cyclosporine combined with methotrexate to prevent graft-versus-host disease | 2 |  |  |  |  | 2 |
| Oral aspects of obesity                                                                                                                                                   | 2 |  |  |  |  | 2 |
| Oral care and dental management for patients with epidermolysis bullosa                                                                                                   | 2 |  |  |  |  | 2 |
| Oral care for patients with bulimia                                                                                                                                       | 2 |  |  |  |  | 2 |
| Oral care for the homebound and institutionalized                                                                                                                         | 2 |  |  |  |  | 2 |
| Oral care of elderly patients: nurses' knowledge and views                                                                                                                | 2 |  |  |  |  | 2 |
| Oral characteristics of children with visual or auditory impairments                                                                                                      | 2 |  |  |  |  | 2 |
| Oral chronic graft-versus-host disease: What the general dental practitioner needs to know                                                                                | 2 |  |  |  |  | 2 |
| Oral condition in children treated with bone marrow transplantation                                                                                                       | 2 |  |  |  |  | 2 |
| Oral conditions and need for dental treatment in an elderly population in northern Norway                                                                                 | 2 |  |  |  |  | 2 |
| Oral conditions of inhabitants in Tokashiki Island, Okinawa]                                                                                                              | 2 |  |  |  |  | 2 |
| Oral diagnosis and treatment planning: part 8. Reviews and maintenance of restorations                                                                                    | 2 |  |  |  |  | 2 |
| Oral disease and social class in a random sample of five-year-old preschool children in a Brazilian city                                                                  | 2 |  |  |  |  | 2 |
| Oral findings and dental behaviour before and after liver transplantation - a single-centre cross-sectional study                                                         | 2 |  |  |  |  | 2 |
| Oral findings and dental treatment in a child with West syndrome                                                                                                          | 2 |  |  |  |  | 2 |
| Oral findings and treatment of patients with face transplants in Helsinki                                                                                                 | 2 |  |  |  |  | 2 |
| Oral health among children attending an oncology clinic in Trinidad                                                                                                       | 2 |  |  |  |  | 2 |
| Oral health among Dutch elite athletes prior to Rio 2016                                                                                                                  | 2 |  |  |  |  | 2 |
| Oral health and dental behaviour of patients with left ventricular assist device: a cross-sectional study                                                                 | 2 |  |  |  |  | 2 |
| Oral health and dental care facilities in Maltese residential homes                                                                                                       | 2 |  |  |  |  | 2 |
| Oral health and dental care in modern-day China                                                                                                                           | 2 |  |  |  |  | 2 |
| Oral health and dental treatment needs in Nigerian patients with epilepsy                                                                                                 | 2 |  |  |  |  | 2 |
| Oral health and dental treatment needs of people with motor neurone disease                                                                                               | 2 |  |  |  |  | 2 |

|                                                                                                                                                                      |   |  |  |  |  |   |
|----------------------------------------------------------------------------------------------------------------------------------------------------------------------|---|--|--|--|--|---|
| Oral health and dental treatment of patients with renal disease                                                                                                      | 2 |  |  |  |  | 2 |
| Oral health and functional capacity of centenarians                                                                                                                  | 2 |  |  |  |  | 2 |
| Oral Health and Incident Depressive Symptoms: JAGES Project Longitudinal Study in Older Japanese                                                                     | 2 |  |  |  |  | 2 |
| Oral health and medical conditions among Amish children                                                                                                              | 2 |  |  |  |  | 2 |
| Oral Health and Nutritional Characteristics of Adults With Morbid Obesity: A Multivariate Analysis                                                                   | 2 |  |  |  |  | 2 |
| Oral health and oral treatment needs in patients fulfilling the DSM-IV criteria for dental phobia: Possible influence on the outcome of cognitive behavioral therapy | 2 |  |  |  |  | 2 |
| Oral health and oromotor function in rare diseases--a database study                                                                                                 | 2 |  |  |  |  | 2 |
| Oral health and risk factors for dental disease of Australian young people in custody                                                                                | 2 |  |  |  |  | 2 |
| Oral health and self-perceived oral treatment need of adults in Sweden                                                                                               | 2 |  |  |  |  | 2 |
| Oral health and systemic health                                                                                                                                      | 2 |  |  |  |  | 2 |
| Oral health and the older diabetic                                                                                                                                   | 2 |  |  |  |  | 2 |
| Oral health and treatment needs in institutionalized psychiatric patients in India                                                                                   | 2 |  |  |  |  | 2 |
| Oral health attitudes, knowledge, and behavior among school children in North Jordan                                                                                 | 2 |  |  |  |  | 2 |
| Oral health behaviour of Iranian mothers and their 9-year-old children                                                                                               | 2 |  |  |  |  | 2 |
| Oral health behaviours according to demographic characteristics in Korean adolescents: a national representative sample                                              | 2 |  |  |  |  | 2 |
| Oral health care and dental treatment needs in the Barents region                                                                                                    | 2 |  |  |  |  | 2 |
| Oral health care for patients with Alzheimer's disease: An update                                                                                                    | 2 |  |  |  |  | 2 |
| Oral health care for patients with epidermolysis bullosa--best clinical practice guidelines                                                                          | 2 |  |  |  |  | 2 |
| Oral health care for the elderly. More than care for the mouth only]                                                                                                 | 2 |  |  |  |  | 2 |
| Oral health care for the patient with schizophrenia                                                                                                                  | 2 |  |  |  |  | 2 |
| Oral health care for the pregnant patient                                                                                                                            | 2 |  |  |  |  | 2 |
| Oral health care in the elderly population in Malaysia--a review                                                                                                     | 2 |  |  |  |  | 2 |
| Oral health care in the Xingu Indigenous Park, Brazil, from 2004 to 2013: an analysis based on evaluation indicators]                                                | 2 |  |  |  |  | 2 |
| Oral health care issues in aged care facilities in Western Australia: resident and family caregiver views                                                            | 2 |  |  |  |  | 2 |
| Oral Health Care of Vietnamese Adolescents: A Qualitative Study of Perceptions and Practices                                                                         | 2 |  |  |  |  | 2 |
| Oral health care patterns and the history of miscarriage                                                                                                             | 2 |  |  |  |  | 2 |
| Oral Health Characteristics and Dental Rehabilitation of Children with Global Developmental Delay                                                                    | 2 |  |  |  |  | 2 |
| Oral Health Coalition: Knowledge, Attitude, Practice Behaviours among Gynaecologists and Dental Practitioners                                                        | 2 |  |  |  |  | 2 |
| Oral health concerns of an elderly population in England                                                                                                             | 2 |  |  |  |  | 2 |
| Oral health condition in southern Chinese after radiotherapy for nasopharyngeal carcinoma: extent and nature of the problem                                          | 2 |  |  |  |  | 2 |
| Oral health condition of the population in special elderly nursing home]                                                                                             | 2 |  |  |  |  | 2 |
| Oral health conditions of community-dwelling cognitively intact elderly persons with disabilities                                                                    | 2 |  |  |  |  | 2 |
| Oral health conditions of the elderly at the Lar Samaritano long-term-care facility in São Gonçalo-RJ]                                                               | 2 |  |  |  |  | 2 |
| Oral health disparities between ranks in a military environment: Israel Defense Force as a model                                                                     | 2 |  |  |  |  | 2 |
| Oral health during pregnancy                                                                                                                                         | 2 |  |  |  |  | 2 |
| Oral health during pregnancy: current research                                                                                                                       | 2 |  |  |  |  | 2 |

|                                                                                                                                                                           |   |  |  |  |  |   |
|---------------------------------------------------------------------------------------------------------------------------------------------------------------------------|---|--|--|--|--|---|
| Oral Health Education in Children before Dental Treatment under General Anesthesia                                                                                        | 2 |  |  |  |  | 2 |
| Oral health habits and the number of teeth present in Japanese aged 50-80 years                                                                                           | 2 |  |  |  |  | 2 |
| Oral Health Impacts on Flavor and Significance in Dental Treatment                                                                                                        | 2 |  |  |  |  | 2 |
| Oral Health Implications of Cannabis Smoking: A Rapid Evidence Review                                                                                                     | 2 |  |  |  |  | 2 |
| Oral health in Alzheimer's disease: a review                                                                                                                              | 2 |  |  |  |  | 2 |
| Oral health in Brazilian patients with chronic renal disease                                                                                                              | 2 |  |  |  |  | 2 |
| Oral health in children and adolescents with myotonic dystrophy                                                                                                           | 2 |  |  |  |  | 2 |
| Oral health in groups of refugees in Sweden                                                                                                                               | 2 |  |  |  |  | 2 |
| Oral health in patients with chronic renal failure]                                                                                                                       | 2 |  |  |  |  | 2 |
| Oral health in patients with systemic sclerosis]                                                                                                                          | 2 |  |  |  |  | 2 |
| Oral health in prevalent types of Ehlers-Danlos syndromes                                                                                                                 | 2 |  |  |  |  | 2 |
| Oral health in the EpiFloripa: a prospective study of adult health in southern Brazil]                                                                                    | 2 |  |  |  |  | 2 |
| Oral health in Tunisia                                                                                                                                                    | 2 |  |  |  |  | 2 |
| Oral health in young adults in Germany--a comparison between women and men of the German army]                                                                            | 2 |  |  |  |  | 2 |
| Oral health is important, but often overlooked                                                                                                                            | 2 |  |  |  |  | 2 |
| Oral health knowledge and practices in the Kaski District of Nepal                                                                                                        | 2 |  |  |  |  | 2 |
| Oral health knowledge of health care workers in special children's center                                                                                                 | 2 |  |  |  |  | 2 |
| Oral health knowledge, attitude and practices of children and adolescents of orphanages in jodhpur city rajasthan, India                                                  | 2 |  |  |  |  | 2 |
| Oral health knowledge, attitudes and behaviour of adults in China                                                                                                         | 2 |  |  |  |  | 2 |
| Oral Health Knowledge, Attitudes, and Perceptions of Pregnant Kuwaiti Women: A Qualitative Study                                                                          | 2 |  |  |  |  | 2 |
| Oral health literacy and associated oral conditions: A systematic review                                                                                                  | 2 |  |  |  |  | 2 |
| Oral Health Literacy as a Predictor of Dental Anxiety in Parents of Children Undergoing Dental Treatment                                                                  | 2 |  |  |  |  | 2 |
| Oral health literacy, oral health behaviours and dental outcomes                                                                                                          | 2 |  |  |  |  | 2 |
| Oral health management implications in patients with tuberous sclerosis                                                                                                   | 2 |  |  |  |  | 2 |
| Oral health management of 97 patients living with HIV/AIDS in Ribeirão Preto, São Paulo, Brazil                                                                           | 2 |  |  |  |  | 2 |
| Oral health needs among adults in the United States with chronic diseases                                                                                                 | 2 |  |  |  |  | 2 |
| Oral health needs and barriers to accessing care among the elderly in Johannesburg                                                                                        | 2 |  |  |  |  | 2 |
| Oral health needs and barriers to dental care in hospitalized children                                                                                                    | 2 |  |  |  |  | 2 |
| Oral health needs of adolescents in a juvenile detention facility                                                                                                         | 2 |  |  |  |  | 2 |
| Oral health needs of athletes with intellectual disability in Southern Europe: Greece, Italy and Spain                                                                    | 2 |  |  |  |  | 2 |
| Oral health of Alzheimer's patients in São José dos Campos, Brazil                                                                                                        | 2 |  |  |  |  | 2 |
| Oral health of children and adolescents with or without attention deficit hyperactivity disorder (ADHD) living in residential care in rural Rhineland-Palatinate, Germany | 2 |  |  |  |  | 2 |
| Oral Health of Children with Congenital Heart Disease at a Pediatric Health Science Centre                                                                                | 2 |  |  |  |  | 2 |
| Oral health of female prisoners in HMP Holloway: implications for oral health promotion in UK prisons                                                                     | 2 |  |  |  |  | 2 |
| Oral health of hemodialysis patients: a cross-sectional study at two German dialysis centers                                                                              | 2 |  |  |  |  | 2 |
| Oral health of institutionalised elderly: a qualitative study of health caregivers' perceptions in Brazil                                                                 | 2 |  |  |  |  | 2 |

|                                                                                                                                                           |   |  |  |  |  |   |
|-----------------------------------------------------------------------------------------------------------------------------------------------------------|---|--|--|--|--|---|
| Oral Health of Patients with Special Health Care Needs After General Anesthesia: A 25- Year Retrospective Study                                           | 2 |  |  |  |  | 2 |
| Oral health of psychiatric in-patients in Hong Kong                                                                                                       | 2 |  |  |  |  | 2 |
| Oral health of seafarers - a review                                                                                                                       | 2 |  |  |  |  | 2 |
| Oral health of Singapore adults                                                                                                                           | 2 |  |  |  |  | 2 |
| Oral health perception and plight of patients of schizophrenia                                                                                            | 2 |  |  |  |  | 2 |
| Oral health perceptions and adherence with dental treatment referrals among caregivers of children with HIV                                               | 2 |  |  |  |  | 2 |
| Oral health problems and treatment needs in Danish military personnel recruited for United Nations service                                                | 2 |  |  |  |  | 2 |
| Oral Health Related Awareness and Practices among Pregnant Women in Bagalkot District, Karnataka, India                                                   | 2 |  |  |  |  | 2 |
| Oral health related quality of life among Dutch forensic psychiatric patients]                                                                            | 2 |  |  |  |  | 2 |
| Oral Health Related Quality of Life in Young Individuals with Dental Anxiety and Exaggerated Gag Reflex                                                   | 2 |  |  |  |  | 2 |
| Oral health related to demographic features in Bosnian children aged six                                                                                  | 2 |  |  |  |  | 2 |
| Oral health services utilization and influencing factors in downtown community residents older than 15 years in Beijing]                                  | 2 |  |  |  |  | 2 |
| Oral Health Status Among Adults With and Without Prior Active Duty Service in the U.S. Armed Forces, NHANES 2011-2014                                     | 2 |  |  |  |  | 2 |
| Oral Health Status among Children with Down Syndrome in Dubai, United Arab Emirates                                                                       | 2 |  |  |  |  | 2 |
| Oral health status and care of institutionalized elderly individuals in Lebanon                                                                           | 2 |  |  |  |  | 2 |
| Oral health status and dental care behaviours of head and neck cancer patients: a cross-sectional study in an Austrian tertiary hospital                  | 2 |  |  |  |  | 2 |
| Oral health status and dental care of the elderly population]                                                                                             | 2 |  |  |  |  | 2 |
| Oral health status and dental needs of an autistic population of children and young adults                                                                | 2 |  |  |  |  | 2 |
| Oral Health Status and Dental Treatment Needs of 5-12-year-old Children with Disabilities Attending Special Schools in Western Maharashtra, India         | 2 |  |  |  |  | 2 |
| Oral health status and its impact on the quality of life of children and adolescents living with HIV-1                                                    | 2 |  |  |  |  | 2 |
| Oral health status and need for oral care of care-dependent indwelling elderly: from admission to death                                                   | 2 |  |  |  |  | 2 |
| Oral health status and need of dental treatment in the elderly Danish population                                                                          | 2 |  |  |  |  | 2 |
| Oral health status and needs for dental treatment in geriatric patients in a Danish district hospital                                                     | 2 |  |  |  |  | 2 |
| Oral Health Status and Patterns of Dental Service Utilization of Adolescents in Lesotho, Southern Africa                                                  | 2 |  |  |  |  | 2 |
| Oral health status and practices of 5 and 12 year old Indian tribal children                                                                              | 2 |  |  |  |  | 2 |
| Oral health status and risk determinants in adult Syrian refugees in Jordan                                                                               | 2 |  |  |  |  | 2 |
| Oral health status and risk of bacteremia following allogeneic hematopoietic cell transplantation                                                         | 2 |  |  |  |  | 2 |
| Oral health status and treatment need among institutionalised hearing-impaired and blind children and young adults in Udaipur, India. A comparative study | 2 |  |  |  |  | 2 |
| Oral health status and treatment needs among HIV/AIDS patients attending antiretroviral therapy center in Western India: A cross-sectional study          | 2 |  |  |  |  | 2 |

|                                                                                                                                                                                      |   |  |  |  |  |   |
|--------------------------------------------------------------------------------------------------------------------------------------------------------------------------------------|---|--|--|--|--|---|
| Oral Health Status and Treatment Needs among Pregnant Women of Raichur District, India: A Population Based Cross-Sectional Study                                                     | 2 |  |  |  |  | 2 |
| Oral health status and treatment needs in immigrants and refugees in Italy                                                                                                           | 2 |  |  |  |  | 2 |
| Oral health status and treatment needs in institutionalized psychiatric patients: one year descriptive cross sectional study                                                         | 2 |  |  |  |  | 2 |
| Oral health status and treatment needs in long-term medicine patients in a Copenhagen hospital department                                                                            | 2 |  |  |  |  | 2 |
| Oral health status and treatment needs of non-institutionalized persons aged 60+ in Adelaide, South Australia                                                                        | 2 |  |  |  |  | 2 |
| Oral health status and treatment requirements of hospitalized psychiatric patients in Bangalore city: a comparative study                                                            | 2 |  |  |  |  | 2 |
| Oral health status in a group of children and adolescents with myotonic dystrophy type 1 over a 4-year period                                                                        | 2 |  |  |  |  | 2 |
| Oral health status in adult patients with newly diagnosed acute leukemia                                                                                                             | 2 |  |  |  |  | 2 |
| Oral health status in children and adolescents with haemophilia                                                                                                                      | 2 |  |  |  |  | 2 |
| Oral Health Status in Children with Acute Lymphoblastic Leukemia and Lymphoma                                                                                                        | 2 |  |  |  |  | 2 |
| Oral health status in children with intellectual disability living in organized groups]                                                                                              | 2 |  |  |  |  | 2 |
| Oral health status in epileptic children                                                                                                                                             | 2 |  |  |  |  | 2 |
| Oral health status of 65- to 74-year-old Danes: a preliminary report of the replication of W.H.O.'s international collaborative study in Denmark                                     | 2 |  |  |  |  | 2 |
| Oral health status of a population of community-dwelling older Canadians                                                                                                             | 2 |  |  |  |  | 2 |
| Oral health status of autistic children in India                                                                                                                                     | 2 |  |  |  |  | 2 |
| Oral health status of children and adults in Madagascar                                                                                                                              | 2 |  |  |  |  | 2 |
| Oral health status of children with special health care needs receiving dental treatment under general anesthesia at the dental clinic of Taipei Veterans General Hospital in Taiwan | 2 |  |  |  |  | 2 |
| Oral health status of children with treacher Collins syndrome                                                                                                                        | 2 |  |  |  |  | 2 |
| Oral health status of drug addicts in the Czech Republic                                                                                                                             | 2 |  |  |  |  | 2 |
| Oral health status of institutionalized elderly Cape Coloreds from the Cape Peninsula of South Africa                                                                                | 2 |  |  |  |  | 2 |
| Oral health status of long-term care residents in Canada: Results of a national cross-sectional study                                                                                | 2 |  |  |  |  | 2 |
| Oral health status of long-term care residents-a vulnerable population                                                                                                               | 2 |  |  |  |  | 2 |
| Oral Health Status of Male Swedish Citizens at Admission to Prison                                                                                                                   | 2 |  |  |  |  | 2 |
| Oral health status of non-phobic and dentally phobic individuals                                                                                                                     | 2 |  |  |  |  | 2 |
| Oral health status of patients seeking emergency dental care in Transkei                                                                                                             | 2 |  |  |  |  | 2 |
| Oral health status of the ethnic group Xukuru from Ororubá: multilevel analysis                                                                                                      | 2 |  |  |  |  | 2 |
| Oral health status of women with high-risk pregnancies                                                                                                                               | 2 |  |  |  |  | 2 |
| Oral health status of women with normal and high-risk pregnancies]                                                                                                                   | 2 |  |  |  |  | 2 |
| Oral health status, dental anxiety, and behavior-management problems in children with oppositional defiant disorder                                                                  | 2 |  |  |  |  | 2 |
| Oral health status, dental treatment needs, and barriers to dental care of elderly care home residents in Lodz, Poland                                                               | 2 |  |  |  |  | 2 |
| Oral Health Status, Health Behaviour and Treatment Needs of Patients Undergoing Cardiovascular Surgery                                                                               | 2 |  |  |  |  | 2 |
| Oral health status, treatment needs and demands of an elderly institutionalised population in Athens                                                                                 | 2 |  |  |  |  | 2 |

|                                                                                                                                                            |   |  |  |  |  |   |
|------------------------------------------------------------------------------------------------------------------------------------------------------------|---|--|--|--|--|---|
| Oral health status: relationship to nutrient and food intake among 80-year-old Japanese adults                                                             | 2 |  |  |  |  | 2 |
| Oral health studies of the public health midwifery and nursing students before and after dental treatments]                                                | 2 |  |  |  |  | 2 |
| Oral health survey of 6-12-year-old children with disabilities attending special schools in Chennai, India                                                 | 2 |  |  |  |  | 2 |
| Oral Health Survey of 6-14-Year-Old Children with Disabilities Attending Special Schools Yemen                                                             | 2 |  |  |  |  | 2 |
| Oral health survey of military personnel in the Phramongkutklao Hospital, Thailand                                                                         | 2 |  |  |  |  | 2 |
| Oral health treatment habits of people with schizophrenia in France: A retrospective cohort study                                                          | 2 |  |  |  |  | 2 |
| Oral health trends in Maryland                                                                                                                             | 2 |  |  |  |  | 2 |
| Oral health--the status of knowledge 1985. An analysis of a repeated survey of 761 Swiss recruits]                                                         | 2 |  |  |  |  | 2 |
| Oral health-related quality of life after dental general anaesthesia treatment among children: a follow-up study                                           | 2 |  |  |  |  | 2 |
| Oral health-related quality of life after dental treatment in patients with intellectual disability                                                        | 2 |  |  |  |  | 2 |
| Oral health-related quality of life and associated factors in Southern Brazilian elderly                                                                   | 2 |  |  |  |  | 2 |
| Oral health-related quality of life and periodontal and dental health status in Iranian hemodialysis patients                                              | 2 |  |  |  |  | 2 |
| Oral health-related quality of life and related factors among residents in a disaster area of the Great East Japan Earthquake and giant tsunami            | 2 |  |  |  |  | 2 |
| Oral health-related quality of life before and after crown therapy in young patients with amelogenesis imperfecta                                          | 2 |  |  |  |  | 2 |
| Oral health-related quality of life changes in children following dental treatment under general anaesthesia: a meta-analysis                              | 2 |  |  |  |  | 2 |
| Oral health-related quality of life in 6- to 12-year-old schoolchildren in Spain                                                                           | 2 |  |  |  |  | 2 |
| Oral health-related quality of life in Loeys-Dietz syndrome, a rare connective tissue disorder: an observational cohort study                              | 2 |  |  |  |  | 2 |
| Oral health-related quality of life in patients undergoing chronic hemodialysis                                                                            | 2 |  |  |  |  | 2 |
| Oral health-related quality of life in pediatric patients under general anesthesia: A prospective study                                                    | 2 |  |  |  |  | 2 |
| Oral health-related quality of life in southern Chinese following radiotherapy for nasopharyngeal carcinoma                                                | 2 |  |  |  |  | 2 |
| Oral Health-Related Quality of Life in the Elderly in Israel--Results from the National Health and Nutrition Survey of the Elderly 2005-2006               | 2 |  |  |  |  | 2 |
| Oral health-related quality of life of a consecutive sample of Spanish dental patients                                                                     | 2 |  |  |  |  | 2 |
| Oral health-related quality of life of Portuguese adults with mild intellectual disabilities                                                               | 2 |  |  |  |  | 2 |
| Oral health-related quality-of-life in Swedish children before and after dental treatment under general anesthesia                                         | 2 |  |  |  |  | 2 |
| Oral health-seeking behavior among different population groups in Enugu Nigeria                                                                            | 2 |  |  |  |  | 2 |
| Oral health, dental prophylaxis and catheter related bloodstream infections in home parenteral nutrition patients: results of a UK survey and cohort study | 2 |  |  |  |  | 2 |
| Oral health, dental treatment, and cardiac valve surgery outcomes                                                                                          | 2 |  |  |  |  | 2 |
| Oral Health, Nutritional Choices, and Dental Fear and Anxiety                                                                                              | 2 |  |  |  |  | 2 |

|                                                                                                                                                                                        |   |  |  |  |  |   |
|----------------------------------------------------------------------------------------------------------------------------------------------------------------------------------------|---|--|--|--|--|---|
| Oral healthcare management of a child with phakomatosis pigmentovascularis associated with bilateral Sturge-Weber syndrome                                                             | 2 |  |  |  |  | 2 |
| Oral healthcare of clients with learning disability: changes following relocation from hospital to community                                                                           | 2 |  |  |  |  | 2 |
| Oral hygiene and dentition status in children and adults with hemophilia: A case-control study                                                                                         | 2 |  |  |  |  | 2 |
| Oral hygiene care for adults with dementia in residential aged care facilities                                                                                                         | 2 |  |  |  |  | 2 |
| Oral hygiene care for residents with dementia: a literature review                                                                                                                     | 2 |  |  |  |  | 2 |
| Oral Hygiene Practices and Factors Affecting Oral Health Service Utilization among Children (11-14 Years) of Government School of Nikol Ward of East Zone of Ahmedabad, Gujarat, India | 2 |  |  |  |  | 2 |
| Oral hygienist with extended competencies]                                                                                                                                             | 2 |  |  |  |  | 2 |
| Oral infections as predictors of mortality                                                                                                                                             | 2 |  |  |  |  | 2 |
| Oral management for perioperative patients.]                                                                                                                                           | 2 |  |  |  |  | 2 |
| Oral management of a patient with down syndrome and agammaglobulinemia: a case report                                                                                                  | 2 |  |  |  |  | 2 |
| Oral manifestations and challenges in dental treatment of epidermolysis bullosa dystrophica                                                                                            | 2 |  |  |  |  | 2 |
| Oral manifestations and dental management of a child with Zellweger syndrome                                                                                                           | 2 |  |  |  |  | 2 |
| Oral manifestations of acute leukaemia]                                                                                                                                                | 2 |  |  |  |  | 2 |
| Oral manifestations of systemic sclerosis]                                                                                                                                             | 2 |  |  |  |  | 2 |
| Oral Rehabilitation and Management for Secondary Sjögren's Syndrome in a Child                                                                                                         | 2 |  |  |  |  | 2 |
| Oral status and acceptance of dental services among some elderly persons in Oslo                                                                                                       | 2 |  |  |  |  | 2 |
| Oral status and treatment needs among elderly within municipal long-term care 2002-2004                                                                                                | 2 |  |  |  |  | 2 |
| Oral status of HIV-infected children aged 12 years or younger who attended a Paediatric Infectious Diseases Clinic in Cape Town                                                        | 2 |  |  |  |  | 2 |
| Oral treatment need and oral treatment intention in a population enrolled in long-term care in nursing homes and home care                                                             | 2 |  |  |  |  | 2 |
| Oral-Health-Related Quality of Life in Children and Adolescents                                                                                                                        | 2 |  |  |  |  | 2 |
| Oral-health-related quality of life in patients with cancer: cultural adaptation and the psychometric testing of the Persian version of EORTC QLQ-OHI7                                 | 2 |  |  |  |  | 2 |
| Oral/dental items in the resident assessment instrument - minimum Data Set 2.0 lack validity: results of a retrospective, longitudinal validation study                                | 2 |  |  |  |  | 2 |
| Oro-dental health in children with chronic renal failure and after renal transplantation: a clinical review                                                                            | 2 |  |  |  |  | 2 |
| Oro-dental status and medical problems of stroke inpatients undergoing rehabilitation at a rehabilitation hospital in Japan                                                            | 2 |  |  |  |  | 2 |
| Orofacial function and monitoring of oral care in amyotrophic lateral sclerosis                                                                                                        | 2 |  |  |  |  | 2 |
| Orofacial manifestations and dental management of systemic lupus erythematosus: A review                                                                                               | 2 |  |  |  |  | 2 |
| Osteoporosis: Its Prosthodontic Considerations - A Review                                                                                                                              | 2 |  |  |  |  | 2 |
| Osteoradionecrosis, oral health and dental treatment                                                                                                                                   | 2 |  |  |  |  | 2 |
| Outpatient (Same-Day) Total Hip Replacement                                                                                                                                            | 2 |  |  |  |  | 2 |
| Pain and anxiety control in Down syndrome                                                                                                                                              | 2 |  |  |  |  | 2 |
| Pain catastrophizing in dental patients: implications for treatment management                                                                                                         | 2 |  |  |  |  | 2 |
| Palliative dental care- a boon for debilitating                                                                                                                                        | 2 |  |  |  |  | 2 |
| Palliative dental care: Ignored dimension of dentistry amidst COVID-19 pandemic                                                                                                        | 2 |  |  |  |  | 2 |

|                                                                                                                                                                 |   |  |  |  |  |   |
|-----------------------------------------------------------------------------------------------------------------------------------------------------------------|---|--|--|--|--|---|
| Papillon-Lefevre syndrome: A case report of 2 affected siblings                                                                                                 | 2 |  |  |  |  | 2 |
| Parental attitude toward behavioral management techniques in dental practice with schoolchildren in Kuwait                                                      | 2 |  |  |  |  | 2 |
| Parental Attitude towards the Provision of Nonsurgical Oral Health Care to Children with Oral Clefts: An Epidemiological Survey                                 | 2 |  |  |  |  | 2 |
| Parental attitudes and experiences of dental care in children and adolescents with ADHD--a questionnaire study                                                  | 2 |  |  |  |  | 2 |
| Parental knowledge and attitudes towards pit and fissure sealants                                                                                               | 2 |  |  |  |  | 2 |
| Parental knowledge, attitudes and cultural beliefs regarding oral health and dental care of preschool children in an Indian population: a quantitative study    | 2 |  |  |  |  | 2 |
| Parental quality-of-life impacts following children's dento-alveolar trauma                                                                                     | 2 |  |  |  |  | 2 |
| Parents' dental anxiety and oral health literacy: effects on parents' and children's oral health-related experiences                                            | 2 |  |  |  |  | 2 |
| Parents' perceptions of oral health conditions depicted in photographs of anterior permanent teeth                                                              | 2 |  |  |  |  | 2 |
| Past, present, and future trends in dental health and the dental system in New Zealand                                                                          | 2 |  |  |  |  | 2 |
| Patient autonomy as a necessary but limited ethical principle in shaping the dentist-patient relationship                                                       | 2 |  |  |  |  | 2 |
| Patient satisfaction as outcome measure in clinical studies of oral health]                                                                                     | 2 |  |  |  |  | 2 |
| Patient satisfaction at rural outreach dental camps - a one year report                                                                                         | 2 |  |  |  |  | 2 |
| Patient satisfaction with dental hygiene providers in US military clinics                                                                                       | 2 |  |  |  |  | 2 |
| Patient satisfaction with dental treatment at a university dental clinic: A qualitative analysis                                                                | 2 |  |  |  |  | 2 |
| Patient-active prevention in primary dental care: a characterisation of general practices in Northern Ireland                                                   | 2 |  |  |  |  | 2 |
| Patient's satisfaction with the dental care provided by dental students                                                                                         | 2 |  |  |  |  | 2 |
| Patients with poor oral health status received little dental care and patients at the terminal stage of their lives received comprehensive dental treatment     | 2 |  |  |  |  | 2 |
| Pattern of antibiotic prophylaxis practice for dental procedures in children with congenital heart disease                                                      | 2 |  |  |  |  | 2 |
| Patterns and reasons for tooth extraction at the Winterveldt Clinic: 1998-2002                                                                                  | 2 |  |  |  |  | 2 |
| Patterns of care and service use amongst children in the UK 2003                                                                                                | 2 |  |  |  |  | 2 |
| Patterns of emergency department use for dental and oral health care: implications for dental and medical care coordination                                     | 2 |  |  |  |  | 2 |
| Patterns of tooth loss in older adults with and without dementia: a retrospective study based on a Minnesota cohort                                             | 2 |  |  |  |  | 2 |
| Peculiarities of Dental Treatment among Paediatric Oncological Patients: a Case Report                                                                          | 2 |  |  |  |  | 2 |
| Perceived and Assessed Dental Treatment Needs of Schoolchildren in Benoe Division, Cameroon                                                                     | 2 |  |  |  |  | 2 |
| Perceived barriers encountered by oral health professionals in the Australian public dental system providing dental treatment to individuals with special needs | 2 |  |  |  |  | 2 |
| Perceived control and negative affect predict expected and experienced acute clinical pain: a structural modeling analysis                                      | 2 |  |  |  |  | 2 |
| Perceived dental needs and attitudes toward dental treatments in HIV-infected Thais                                                                             | 2 |  |  |  |  | 2 |
| Perceived dental treatment need among older Tanzanian adults - a cross-sectional study                                                                          | 2 |  |  |  |  | 2 |

|                                                                                                                                                                |   |  |  |  |  |   |
|----------------------------------------------------------------------------------------------------------------------------------------------------------------|---|--|--|--|--|---|
| Perceived need and use of oral health services among adolescents and adults in Tanzania                                                                        | 2 |  |  |  |  | 2 |
| Perceived need for and utilization of dental care in Indonesia in 2006 and 2007: a secondary analysis                                                          | 2 |  |  |  |  | 2 |
| Perceived need for dental care in dentate older adults                                                                                                         | 2 |  |  |  |  | 2 |
| Perceived oral health in patients with Crohn's disease                                                                                                         | 2 |  |  |  |  | 2 |
| Perceived oral health status and treatment needs of dental auxiliaries                                                                                         | 2 |  |  |  |  | 2 |
| Perceived oral health status and treatment needs of dental students                                                                                            | 2 |  |  |  |  | 2 |
| Percentile curves for food acceptance response scores in assessing chewing functions in adults                                                                 | 2 |  |  |  |  | 2 |
| Perception of health care providers toward geriatric oral health in Belgaum district: A cross-sectional study                                                  | 2 |  |  |  |  | 2 |
| Perception of Iranian Mothers About Oral Health of Their School-Children: A Qualitative Study                                                                  | 2 |  |  |  |  | 2 |
| Perception of orofacial appearance among laypersons with diverse social and demographic status                                                                 | 2 |  |  |  |  | 2 |
| Perception of Protective Stabilization by Pediatric Dentists: A Qualitative Study                                                                              | 2 |  |  |  |  | 2 |
| Perceptions and use of dental quacks (unqualified dental practitioners) and self rated oral health in Trinidad                                                 | 2 |  |  |  |  | 2 |
| Perceptions of caregivers regarding the importance of dental care for institutionalised seniors: a pilot study                                                 | 2 |  |  |  |  | 2 |
| Perceptions of dental treatment need in Australian-born and migrant populations                                                                                | 2 |  |  |  |  | 2 |
| Perceptions of oral health adequacy and access in Michigan nursing facilities                                                                                  | 2 |  |  |  |  | 2 |
| Perceptions of primary health care service users regarding dental team practices in Brazil                                                                     | 2 |  |  |  |  | 2 |
| Perinatal Oral Health: A Novel Collaborative Initiative to Improve Access, Attitudes, Comfort Level, and Knowledge of Pregnant Women and Dental Providers      | 2 |  |  |  |  | 2 |
| Periodontal and Dental Considerations in Florid Cemento-Osseous Dysplasia: Clinical and Radiographic Analysis of 11 Cases                                      | 2 |  |  |  |  | 2 |
| Periodontal Condition and Treatment Needs of Some Pregnant Women in Ibadan, Nigeria                                                                            | 2 |  |  |  |  | 2 |
| Periodontal conditions in adolescents and young Brazilians and associated factors: Cross-sectional study with data from the Brazilian oral health survey, 2010 | 2 |  |  |  |  | 2 |
| Periodontal disease and liver cirrhosis: A systematic review                                                                                                   | 2 |  |  |  |  | 2 |
| Periodontal health--challenges in restorative dentistry                                                                                                        | 2 |  |  |  |  | 2 |
| Periodontal status and IOTN interventions among young hemophiliacs                                                                                             | 2 |  |  |  |  | 2 |
| Periodontal status and selected parameters of oral condition of Poles aged 65 to 74 years                                                                      | 2 |  |  |  |  | 2 |
| Periodontal treatment needs and workforce requirements: comparisons between the normative and sociodental approaches using different skill mix models          | 2 |  |  |  |  | 2 |
| Pharmacokinetics and drug safety of oral infectious disease during pregnancy]                                                                                  | 2 |  |  |  |  | 2 |
| Phenytoin-induced gingival overgrowth management with periodontal treatment                                                                                    | 2 |  |  |  |  | 2 |
| Philosophical approach in old adults dental treatment                                                                                                          | 2 |  |  |  |  | 2 |
| Planning dental treatment for people with special needs                                                                                                        | 2 |  |  |  |  | 2 |
| Planning oral health care using the sociodental approach and the index of family living conditions: a cross-sectional study in Brazilian adolescents           | 2 |  |  |  |  | 2 |
| Poor patient awareness of the relationship between smoking and periodontal diseases                                                                            | 2 |  |  |  |  | 2 |

|                                                                                                                                                                                   |   |  |  |  |  |   |
|-----------------------------------------------------------------------------------------------------------------------------------------------------------------------------------|---|--|--|--|--|---|
| Poor self-rated mastication and associated factors in Brazilian adults]                                                                                                           | 2 |  |  |  |  | 2 |
| Popliteal pterygium syndrome: orofacial and general features                                                                                                                      | 2 |  |  |  |  | 2 |
| Possible predictors of discontinuation of specialized dental treatment among children and adolescents with dental behaviour management problems                                   | 2 |  |  |  |  | 2 |
| Practices and opinions of Connecticut general dentists regarding dental treatment during pregnancy                                                                                | 2 |  |  |  |  | 2 |
| Pre-Radiation dental considerations and management for head and neck cancer patients                                                                                              | 2 |  |  |  |  | 2 |
| Predicting concerns for the mouth among institutionalized elders                                                                                                                  | 2 |  |  |  |  | 2 |
| Predicting dental attendance from dental hygienists' autonomy support and patients' autonomous motivation: A randomised clinical trial                                            | 2 |  |  |  |  | 2 |
| Prediction factors for failure to seek treatment following traumatic dental injuries to primary teeth                                                                             | 2 |  |  |  |  | 2 |
| Predictive modeling of dental pain using neural network                                                                                                                           | 2 |  |  |  |  | 2 |
| Predictive value of dental readiness and psychological dimensions for oral health-related quality of life in Croatian soldiers: a cross-sectional study                           | 2 |  |  |  |  | 2 |
| Predictors of dental care utilization among working poor Canadians                                                                                                                | 2 |  |  |  |  | 2 |
| Predictors of early postoperative pneumonia after oncologic surgery with the patients receiving professional oral health care: A prospective, multicentre, cohort study           | 2 |  |  |  |  | 2 |
| Predisposing, enabling, and need for dental treatment characteristics of ICS-II USA ethnically diverse groups                                                                     | 2 |  |  |  |  | 2 |
| Preferences for dental decisional control and associations with quality of life among third molar patients attending public dental services                                       | 2 |  |  |  |  | 2 |
| Preferences of parents of children with autism spectrum disorders concerning oral health and dental treatment                                                                     | 2 |  |  |  |  | 2 |
| Preferences Related to the Use of Mobile Apps as Dental Patient Educational Aids: A Pilot Study                                                                                   | 2 |  |  |  |  | 2 |
| Pregnancy and dental treatment]                                                                                                                                                   | 2 |  |  |  |  | 2 |
| Pregnancy and oral health: utilisation of dental services during pregnancy in northern Greece                                                                                     | 2 |  |  |  |  | 2 |
| Preoperative analgesia for children and adolescents to reduce pain associated with dental treatment                                                                               | 2 |  |  |  |  | 2 |
| Preoperative analgesics for additional pain relief in children and adolescents having dental treatment                                                                            | 2 |  |  |  |  | 2 |
| Prescription Opioid Abuse and its Potential Role in Gross Dental Decay                                                                                                            | 2 |  |  |  |  | 2 |
| Presentation and management of facial swellings of odontogenic origin in children                                                                                                 | 2 |  |  |  |  | 2 |
| Prevalence and distribution of oral mucosal lesions in an adult Turkish population                                                                                                | 2 |  |  |  |  | 2 |
| Prevalence and extent of chronic periodontitis and its risk factors in a Portuguese subpopulation: a retrospective cross-sectional study and analysis of Clinical Attachment Loss | 2 |  |  |  |  | 2 |
| Prevalence and factors associated with traumatic dental injuries among schoolchildren in war-torn Libya                                                                           | 2 |  |  |  |  | 2 |
| Prevalence and risk factors of hepatitis B and C virus infections among the general population and blood donors in Morocco                                                        | 2 |  |  |  |  | 2 |
| Prevalence and socio-demographic correlates of dental anxiety among a group of adult patients attending a dental institution in Vadodara city, Gujarat, India                     | 2 |  |  |  |  | 2 |

|                                                                                                                                                                                                       |   |  |  |  |  |   |
|-------------------------------------------------------------------------------------------------------------------------------------------------------------------------------------------------------|---|--|--|--|--|---|
| PREVALENCE OF COEXISTING DIABETES MELLITUS AND HYPERTENSION AMONG DENTAL PATIENTS IN A TERTIARY CARE HOSPITAL                                                                                         | 2 |  |  |  |  | 2 |
| Prevalence of dental anxiety among 5- to 8-year-old Taiwanese children                                                                                                                                | 2 |  |  |  |  | 2 |
| Prevalence of dental anxiety and associations with oral health, psychological distress, avoidance and anticipated pain in adolescence: a cross-sectional study based on the Tromsø study, Fit Futures | 2 |  |  |  |  | 2 |
| Prevalence of dental anxiety in children and adolescents globally: A systematic review with meta-analyses                                                                                             | 2 |  |  |  |  | 2 |
| Prevalence of dental anxiety in The Netherlands                                                                                                                                                       | 2 |  |  |  |  | 2 |
| Prevalence of Dental Fear among 6-15 Years Old School Children                                                                                                                                        | 2 |  |  |  |  | 2 |
| Prevalence of Dental Trauma and Receipt of Its Treatment among Male School Children in the Eastern Province of Saudi Arabia                                                                           | 2 |  |  |  |  | 2 |
| Prevalence of myths regarding oral health among pregnant women in North India                                                                                                                         | 2 |  |  |  |  | 2 |
| Prevalence of oral cancer self-examination among elderly people treated under Brazil's Unified Health System: household health survey                                                                 | 2 |  |  |  |  | 2 |
| Prevalence of oral disease and treatment types proposed to children affected by Autistic Spectrum Disorder in Pediatric Dentistry: a Systematic Review                                                | 2 |  |  |  |  | 2 |
| Prevalence of oral health-related conditions that could trigger accidents for patients with moderate-to-severe dementia                                                                               | 2 |  |  |  |  | 2 |
| Prevalence of oral lesions in and dental needs of patients with newly diagnosed acute leukemia                                                                                                        | 2 |  |  |  |  | 2 |
| Prevalence of oral mucosal disorders in institutionalized and non-institutionalized psychiatric patients: a study from AVBR Hospital in central India                                                 | 2 |  |  |  |  | 2 |
| Prevalence of systemic diseases among patients requesting dental consultation in the public and private systems                                                                                       | 2 |  |  |  |  | 2 |
| Prevalence of xerostomia and hyposalivation and their association with quality of life in elderly patients in dependence on dental status and prosthetic rehabilitation: a pilot study                | 2 |  |  |  |  | 2 |
| Prevention of infective endocarditis: are recommendations about oral health procedures for high or moderate risk patients respected?]                                                                 | 2 |  |  |  |  | 2 |
| Prevention of oral mucositis in patients treated with high-dose chemotherapy and bone marrow transplantation: a randomised controlled trial comparing two protocols of dental care                    | 2 |  |  |  |  | 2 |
| Preventive and clinical care provided to adolescents attending public oral health services New South Wales, Australia: a retrospective study                                                          | 2 |  |  |  |  | 2 |
| Preventive and Control Measures for the Coronavirus Pandemic in Clinical Dentistry                                                                                                                    | 2 |  |  |  |  | 2 |
| Preventive and invasive treatment in special needs patients: a German retrospective study                                                                                                             | 2 |  |  |  |  | 2 |
| Preventive dental behaviors and their association with oral health status in older white men                                                                                                          | 2 |  |  |  |  | 2 |
| Preventive dental management of osteonecrosis of the jaws related to zoledronic acid treatment                                                                                                        | 2 |  |  |  |  | 2 |
| Preventive Dental Treatment Workload/Costs to Mitigate Antiresorptive Bone Medication-related Osteonecrosis Risk                                                                                      | 2 |  |  |  |  | 2 |
| Preventive-curative dental care in a large East German urban population. The 4-year experiences of a Dresden prevention study with 16- to 35-year-old subjects]                                       | 2 |  |  |  |  | 2 |
| Prion disease: possible implications for oral health care                                                                                                                                             | 2 |  |  |  |  | 2 |

|                                                                                                                                                   |   |  |  |  |  |   |
|---------------------------------------------------------------------------------------------------------------------------------------------------|---|--|--|--|--|---|
| Prions in dentistry--what are they, should we be concerned, and what can we do?                                                                   | 2 |  |  |  |  | 2 |
| Priorities for oral health goals in a sample of older adults                                                                                      | 2 |  |  |  |  | 2 |
| Priorities in oral health care in non-EME countries                                                                                               | 2 |  |  |  |  | 2 |
| Prisoners' perception of tobacco use and cessation in Chhatisgarh, India--the truth from behind the bars                                          | 2 |  |  |  |  | 2 |
| Problems associated with providing dental care to patients with HIV-infected and AIDS patients                                                    | 2 |  |  |  |  | 2 |
| Professional dental and oral surgery liability in Italy: a comparative analysis of the insurance products offered to health workers               | 2 |  |  |  |  | 2 |
| Promoting oral health during pregnancy: current evidence and implications for Australian midwives                                                 | 2 |  |  |  |  | 2 |
| Prophylaxis with antibiotics after radiotherapy in the head and neck area]                                                                        | 2 |  |  |  |  | 2 |
| Prosthodontic management of older severe hypodontia patients in general dental practice: a case series                                            | 2 |  |  |  |  | 2 |
| Prosthodontics and the American College of Prosthodontists: a specialty's contribution to improving oral health care                              | 2 |  |  |  |  | 2 |
| Prosthodontics Status and Treatment Needs among the Elderly in the Republic of Macedonia                                                          | 2 |  |  |  |  | 2 |
| Protein-mediated anti-adhesion surface against oral bacteria                                                                                      | 2 |  |  |  |  | 2 |
| Protocol for a feasibility study of a self-help cognitive behavioural therapy resource for the reduction of dental anxiety in young people        | 2 |  |  |  |  | 2 |
| Providing dental care to pregnant patients: a survey of Oregon general dentists                                                                   | 2 |  |  |  |  | 2 |
| Providing timely dental treatment for young children under general anesthesia is a government priority                                            | 2 |  |  |  |  | 2 |
| Provision and utilization of dental services in Amazonas State, Brazil: a case study in a riverine population in Coari municipality]              | 2 |  |  |  |  | 2 |
| Provision of oral health care to adult patients by dental therapists without the prescription of a dentist                                        | 2 |  |  |  |  | 2 |
| Psychological treatment of dental anxiety among adults: a systematic review                                                                       | 2 |  |  |  |  | 2 |
| Psychometric and biohormonal indices of dental anxiety in children. A prospective cohort study                                                    | 2 |  |  |  |  | 2 |
| Psychometric assessment of anxiety with the Modified Dental Anxiety Scale among central Indian adults seeking oral health care to a dental school | 2 |  |  |  |  | 2 |
| Psychophysiological therapy vs. hypnotherapy in the treatment of patients with dental phobia                                                      | 2 |  |  |  |  | 2 |
| Psychosocial consequences of dental fear and anxiety                                                                                              | 2 |  |  |  |  | 2 |
| Psychosocial effects of implant-retained overdentures                                                                                             | 2 |  |  |  |  | 2 |
| Psychosocial factors correlated with children's dental anxiety                                                                                    | 2 |  |  |  |  | 2 |
| Psychosocial, behavioural and oral health indicators--review of the literature                                                                    | 2 |  |  |  |  | 2 |
| Psychotropic drugs and their impact on the treatment of paediatric dental patients                                                                | 2 |  |  |  |  | 2 |
| Public Health Aspects of Paediatric Dental Treatment under General Anaesthetic                                                                    | 2 |  |  |  |  | 2 |
| Public knowledge of dental registration and management of common dental problems                                                                  | 2 |  |  |  |  | 2 |
| Qualitative study on adolescents' reasons to non-adherence to dental treatment                                                                    | 2 |  |  |  |  | 2 |
| Quality assurance in dentistry--past, present and future]                                                                                         | 2 |  |  |  |  | 2 |
| Quality of dental restorations and dental treatment in Dutch schoolchildren                                                                       | 2 |  |  |  |  | 2 |
| Quality of life and mastication in denture wearers and cleft lip and palate adults                                                                | 2 |  |  |  |  | 2 |

|                                                                                                                                                                                       |   |  |  |  |  |   |
|---------------------------------------------------------------------------------------------------------------------------------------------------------------------------------------|---|--|--|--|--|---|
| Quality of life assessment of bone-anchored fixed partial denture patients with unilateral mandibular distal-extension edentulism                                                     | 2 |  |  |  |  | 2 |
| Quality-of-life before and after cognitive behavioral therapy (CBT) in patients with intra-oral injection phobia                                                                      | 2 |  |  |  |  | 2 |
| Radical changes for the financing of dental treatment in The Netherlands                                                                                                              | 2 |  |  |  |  | 2 |
| Rapid response: activity from a hospital based Urgent Dental Care Centre during the COVID-19 pandemic                                                                                 | 2 |  |  |  |  | 2 |
| Re-interventions after restoring teeth-Mining an insurance database                                                                                                                   | 2 |  |  |  |  | 2 |
| Reasons for referral of very elderly patients to the community dental service in rural England and the implications for developing oral health care services                          | 2 |  |  |  |  | 2 |
| Recent Recommendations for Management of Human Immunodeficiency Virus-Positive Patients                                                                                               | 2 |  |  |  |  | 2 |
| Reciprocal longitudinal relationship between dental fear and oral health in schoolchildren                                                                                            | 2 |  |  |  |  | 2 |
| Recuperação do sorriso em crianças e adolescentes acometidos por fluorose dentária endêmica/ Recovery of smile in children and adolescents affected by endemic dental fluorosis       | 2 |  |  |  |  | 2 |
| Reducing child uncooperative behavior during dental treatment through modeling and reinforcement                                                                                      | 2 |  |  |  |  | 2 |
| Regional epidemiologic examination of dental health status]                                                                                                                           | 2 |  |  |  |  | 2 |
| Regular dental visits and dental anxiety in an adult dentate population                                                                                                               | 2 |  |  |  |  | 2 |
| Regular use of dental care services by adults: patterns of utilization and types of services]                                                                                         | 2 |  |  |  |  | 2 |
| Rehabilitation of children with ectodermal dysplasia. Part 1: an international Delphi study                                                                                           | 2 |  |  |  |  | 2 |
| Relations of drug use and socioeconomic factors with adherence to dental treatment among adolescents                                                                                  | 2 |  |  |  |  | 2 |
| Relationship between (18)F-FDG Uptake in the Oral Cavity, Recent Dental Treatments, and Oral Inflammation or Infection: A Retrospective Study of Patients with Suspected Endocarditis | 2 |  |  |  |  | 2 |
| Relationship between dental care and oral health in institutionalized elderly people in Japan                                                                                         | 2 |  |  |  |  | 2 |
| Relationship between odontogenic infections and infective endocarditis]                                                                                                               | 2 |  |  |  |  | 2 |
| Relationship between patients' oral health-related quality of life, satisfaction with dentition, and personality profiles                                                             | 2 |  |  |  |  | 2 |
| Relationship Between the Number of Occlusal Supporting and Medical Cost: Analysis Using Large Claims Database from Employee Health Care Insurance in Japan                            | 2 |  |  |  |  | 2 |
| Relationship of Body Mass Index with Diet, Physical Activities, and Lifestyles of Dental Students                                                                                     | 2 |  |  |  |  | 2 |
| Reliability and convergent and discriminant validity of the Child Oral Health Impact Profile (COHIP Child's version)                                                                  | 2 |  |  |  |  | 2 |
| Reliability and validity of the Serbian version of Children's Dental Fear Questionnaire                                                                                               | 2 |  |  |  |  | 2 |
| Remarks concerning oral hygiene instruction in dental treatment by direct contact with the patient]                                                                                   | 2 |  |  |  |  | 2 |
| Removable dental prostheses and cardiovascular survival: a 15-year follow-up study                                                                                                    | 2 |  |  |  |  | 2 |
| Report on the activities carried out by 'Sonrisas' to promote oral health: the experience of a Canadian dental hygienist in the Dominican Republic                                    | 2 |  |  |  |  | 2 |
| Report on the planned dental treatment of Tel-Aviv school children, 1936-52]                                                                                                          | 2 |  |  |  |  | 2 |
| Representation of dental care and oral health in children's drawings                                                                                                                  | 2 |  |  |  |  | 2 |

|                                                                                                                                                                          |   |  |  |  |  |   |
|--------------------------------------------------------------------------------------------------------------------------------------------------------------------------|---|--|--|--|--|---|
| Research issues related to optimal oral health outcomes                                                                                                                  | 2 |  |  |  |  | 2 |
| Resolubility in oral health for primary care as an instrument for the evaluation of health systems]                                                                      | 2 |  |  |  |  | 2 |
| Responsiveness of the Brazilian versions of CPQ(11-14) and Child-OIDP                                                                                                    | 2 |  |  |  |  | 2 |
| Responsiveness of the Early Childhood Oral Health Impact Scale (ECOHIS) is related to dental treatment complexity                                                        | 2 |  |  |  |  | 2 |
| Responsiveness to change for the Brazilian Scale of Oral Health Outcomes for 5-year-old children (SOHO-5)                                                                | 2 |  |  |  |  | 2 |
| Restorative dentistry for the older patient cohort                                                                                                                       | 2 |  |  |  |  | 2 |
| Restoring the Esthetics for a Cleft Palate Patient by Using Modified Preparation and Pink Porcelain                                                                      | 2 |  |  |  |  | 2 |
| Results of the socio-dental survey of people aged 50 and older living in East York, Ontario                                                                              | 2 |  |  |  |  | 2 |
| Results of youth dentistry. Oral health and oral hygiene habits of children participating in regional institutions]                                                      | 2 |  |  |  |  | 2 |
| Retrospective study of dental treatment for elderly hospital inpatients in Wolverhampton                                                                                 | 2 |  |  |  |  | 2 |
| Retrospective study of dental treatment under general anesthesia of 62 disabled children and adolescents]                                                                | 2 |  |  |  |  | 2 |
| Retrospective study on risk factors for repeated dental treatment of children under general anaesthesia                                                                  | 2 |  |  |  |  | 2 |
| Review of the dental treatment backlog of people with disabilities in Europe                                                                                             | 2 |  |  |  |  | 2 |
| Review of Top 10 Prescribed Drugs and Their Interaction with Dental Treatment                                                                                            | 2 |  |  |  |  | 2 |
| Risk evaluation and type of treatment of multiple dental trauma episodes to permanent teeth                                                                              | 2 |  |  |  |  | 2 |
| Risk factors for tooth loss in adult Japanese dental patients: 8020 Promotion Foundation Study                                                                           | 2 |  |  |  |  | 2 |
| Risk indicators associated with tooth loss among Indian adults                                                                                                           | 2 |  |  |  |  | 2 |
| Risk indicators for aggressive periodontitis in an untreated isolated young population from Brazil                                                                       | 2 |  |  |  |  | 2 |
| Risk Indicators of Urgent and Extensive Dental Treatment Needs in U.S. Air Force Recruits                                                                                | 2 |  |  |  |  | 2 |
| Risk of osteoporosis in elderly individuals attending a dental clinic                                                                                                    | 2 |  |  |  |  | 2 |
| Routine scale and polish for periodontal health in adults                                                                                                                | 2 |  |  |  |  | 2 |
| Rubber dam isolation for restorative treatment in dental patients                                                                                                        | 2 |  |  |  |  | 2 |
| Rural-urban disparity in oral health-related quality of life                                                                                                             | 2 |  |  |  |  | 2 |
| Ryan White's impact on access to dental treatment                                                                                                                        | 2 |  |  |  |  | 2 |
| Safety of buccal infiltration local anaesthesia for dental procedures                                                                                                    | 2 |  |  |  |  | 2 |
| Satisfaction level among patients visiting a rural dental institution toward rendered dental treatment in Haryana, North India                                           | 2 |  |  |  |  | 2 |
| Satisfaction level in dental-phobic patients with implant-supported rehabilitation performed under general anaesthesia: a prospective study                              | 2 |  |  |  |  | 2 |
| Satisfaction survey of the dental treatment project of Hadassah and the "International Fellowship of Christians and Jews" among the family and the professional servant] | 2 |  |  |  |  | 2 |
| Schizophrenia and oral healthcare                                                                                                                                        | 2 |  |  |  |  | 2 |
| School performance and oral health conditions: analysis of the impact mediated by socio-economic factors                                                                 | 2 |  |  |  |  | 2 |
| School performance indicators as proxy measures of school dental treatment needs: a feasibility study                                                                    | 2 |  |  |  |  | 2 |
| Scleroderma and CREST syndrome: a case report in dentistry                                                                                                               | 2 |  |  |  |  | 2 |
| Scleroderma: oral manifestations and treatment challenges                                                                                                                | 2 |  |  |  |  | 2 |
| Scottish dentists' preferences for remuneration and their opinions on the scope of General Dental Service treatment                                                      | 2 |  |  |  |  | 2 |

|                                                                                                                                                                   |   |  |  |  |  |   |
|-------------------------------------------------------------------------------------------------------------------------------------------------------------------|---|--|--|--|--|---|
| Screening for prediabetes and risk of periodontal disease                                                                                                         | 2 |  |  |  |  | 2 |
| Screening for rheumatic heart disease: evaluation of a focused cardiac ultrasound approach                                                                        | 2 |  |  |  |  | 2 |
| Secular changes in treatment in a school dental service                                                                                                           | 2 |  |  |  |  | 2 |
| Sedation of anxious children undergoing dental treatment                                                                                                          | 2 |  |  |  |  | 2 |
| Sedation of children undergoing dental treatment                                                                                                                  | 2 |  |  |  |  | 2 |
| Sedation with orally administered midazolam in elderly dental patients with major neurocognitive disorder                                                         | 2 |  |  |  |  | 2 |
| Selection of restorative materials in dental treatment of children and adults in public and private dental care in Finland                                        | 2 |  |  |  |  | 2 |
| Self-perceived oral health, oral treatment need and the use of oral health care of the adult population in Skåne, Sweden                                          | 2 |  |  |  |  | 2 |
| Self-rating of oral health status by student dental surgeon assistants in Ibadan, Nigeria - a pilot survey                                                        | 2 |  |  |  |  | 2 |
| Self-assessed dental status, oral behavior, DMF, and dental anxiety                                                                                               | 2 |  |  |  |  | 2 |
| Self-assessed oral health, cognitive vulnerability and dental anxiety in children: testing a mediational model                                                    | 2 |  |  |  |  | 2 |
| Self-assessment--Need for dental treatment]                                                                                                                       | 2 |  |  |  |  | 2 |
| Self-determined motivational predictors of increases in dental behaviors, decreases in dental plaque, and improvement in oral health: a randomized clinical trial | 2 |  |  |  |  | 2 |
| Self-efficacy as a mediator for improvement in oral health clinical indices]                                                                                      | 2 |  |  |  |  | 2 |
| SELF-MEDICATION PROFILE OF DENTAL PATIENTS ATTENDING A NORTH EASTERN TERTIARY HOSPITAL IN NIGERIA                                                                 | 2 |  |  |  |  | 2 |
| Self-perceived changes in oral health-related quality of life after receiving different types of conventional prosthetic treatments: a cohort follow-up study     | 2 |  |  |  |  | 2 |
| Self-perceived dental treatment need among adolescents: A hierarchical analysis                                                                                   | 2 |  |  |  |  | 2 |
| Self-perceived need for dental treatment and related factors. A cross-sectional population-based study                                                            | 2 |  |  |  |  | 2 |
| Self-perceived oral health among Brazilian elderly individuals                                                                                                    | 2 |  |  |  |  | 2 |
| Self-perceived oral health status and influencing factors of the elderly residents of a peri-urban area of La Paz, Bolivia                                        | 2 |  |  |  |  | 2 |
| Self-perception of people afflicted with leprosy regarding their oral health and the need for treatment]                                                          | 2 |  |  |  |  | 2 |
| Self-perceived need for dental care: a questionnaire study                                                                                                        | 2 |  |  |  |  | 2 |
| Self-rated oral health among Brazilian adults and older adults in Southeast Brazil: results from the SB-Brasil Project, 2003]                                     | 2 |  |  |  |  | 2 |
| Self-reported and clinical oral health in users of VA health care                                                                                                 | 2 |  |  |  |  | 2 |
| Self-reported attitudes and beliefs towards dental care among a South Indian population                                                                           | 2 |  |  |  |  | 2 |
| Self-reported causes for referral to dental treatment under general anaesthesia (DGA): a cross-sectional survey                                                   | 2 |  |  |  |  | 2 |
| Self-reported cost-prohibitive dental care needs among Canadians                                                                                                  | 2 |  |  |  |  | 2 |
| Self-reported dental health, treatment need and attendance among older adults in two areas of Finland                                                             | 2 |  |  |  |  | 2 |
| Self-reported dental status and treatment need among elderly people                                                                                               | 2 |  |  |  |  | 2 |
| Self-reported denture hygiene of a sample of edentulous attendees at a University dental clinic and the relationship to the condition of the oral tissues         | 2 |  |  |  |  | 2 |
| Self-reported gagging in dentistry: prevalence, psycho-social correlates and oral health                                                                          | 2 |  |  |  |  | 2 |
| Self-reported oral health and associated factors in the North Finland 1966 birth cohort at the age of 31                                                          | 2 |  |  |  |  | 2 |

|                                                                                                                                                                                                 |   |  |  |  |  |   |
|-------------------------------------------------------------------------------------------------------------------------------------------------------------------------------------------------|---|--|--|--|--|---|
| Self-reported oral health and use of dental services among asylum seekers and immigrants in Finland-a pilot study                                                                               | 2 |  |  |  |  | 2 |
| Self-reported oral health problems and the ability to organize dental care of community-dwelling elderly aged $\geq 75$ years                                                                   | 2 |  |  |  |  | 2 |
| Self-reported oral health, dental care habits and cardiovascular disease in an adult Swedish population                                                                                         | 2 |  |  |  |  | 2 |
| Senior Smiles: preliminary results for a new model of oral health care utilizing the dental hygienist in residential aged care facilities                                                       | 2 |  |  |  |  | 2 |
| Sensitivity and responsiveness of the Chinese ECOHIS to dental treatment under general anaesthesia                                                                                              | 2 |  |  |  |  | 2 |
| Sensory and motor deficits in the elderly: impact on oral health                                                                                                                                | 2 |  |  |  |  | 2 |
| Sensory focus as therapeutic treatments for acute pain                                                                                                                                          | 2 |  |  |  |  | 2 |
| Sentinel practices in dentistry: a preliminary evaluation                                                                                                                                       | 2 |  |  |  |  | 2 |
| Series: Education and the dentist in 2025. The external practical internship: a taste of professional dental practice]                                                                          | 2 |  |  |  |  | 2 |
| Service connection of dental conditions for treatment purposes. Department of Veterans Affairs. Final rule                                                                                      | 2 |  |  |  |  | 2 |
| Short-Term Effects of a Deterioration of General Health on the Oral Health of Nursing-Home Residents                                                                                            | 2 |  |  |  |  | 2 |
| Should dental hygienists replace dental directors in screening high-needs children?                                                                                                             | 2 |  |  |  |  | 2 |
| Sign language in dental education-A new nexus                                                                                                                                                   | 2 |  |  |  |  | 2 |
| Sleep apnea and mandibular advancement device. Revision of the literature                                                                                                                       | 2 |  |  |  |  | 2 |
| Sleep bruxism: review and update for the restorative dentist                                                                                                                                    | 2 |  |  |  |  | 2 |
| Smoking and oral health in older adults                                                                                                                                                         | 2 |  |  |  |  | 2 |
| Social determinants of dental treatment needs in Brazilian adults                                                                                                                               | 2 |  |  |  |  | 2 |
| Social inequalities in adult oral health in 40 low- and middle-income countries                                                                                                                 | 2 |  |  |  |  | 2 |
| Social supports and prevention strategies as adjuncts and alternatives to sedation and anesthesia for people with special needs                                                                 | 2 |  |  |  |  | 2 |
| Socio-demographic disparity in oral health among the poor: a cross sectional study of early adolescents in Kilwa district, Tanzania                                                             | 2 |  |  |  |  | 2 |
| Sociodental approach to the identification of dental treatment-need groups                                                                                                                      | 2 |  |  |  |  | 2 |
| Socioeconomic differences in self-rated oral health and dental care utilisation after the dental care reform in 2008 in Sweden                                                                  | 2 |  |  |  |  | 2 |
| Socioeconomic-Related Inequalities in Dental Care Utilization in Northwestern Iran                                                                                                              | 2 |  |  |  |  | 2 |
| Solitary median maxillary central incisor syndrome occurring together with oromandibular-limb hypogenesis syndrome type 1: a case report of this previously unreported combination of syndromes | 2 |  |  |  |  | 2 |
| Some characteristics of patients given dental treatment under general anesthesia                                                                                                                | 2 |  |  |  |  | 2 |
| Spatial analysis to identify differentials in dental needs by area-based measures                                                                                                               | 2 |  |  |  |  | 2 |
| Special Care Dentistry Association consensus statement on sedation, anesthesia, and alternative techniques for people with special needs                                                        | 2 |  |  |  |  | 2 |
| Specialised dental care for children with complex disabilities focusing on child's functioning and need for general anaesthesia                                                                 | 2 |  |  |  |  | 2 |
| State of health, access to care and oro-dental treatment. The case of the northern region Pas-de-Calais]                                                                                        | 2 |  |  |  |  | 2 |
| State of the evidence base for medically necessary oral health care                                                                                                                             | 2 |  |  |  |  | 2 |
| Status and strategies of oral health service demand and medical treatment utilization among 3- to 5-year-old preschool children in Jiangxi province]                                            | 2 |  |  |  |  | 2 |

|                                                                                                                                                                           |   |  |  |  |  |   |
|---------------------------------------------------------------------------------------------------------------------------------------------------------------------------|---|--|--|--|--|---|
| Status of dental health in black and white Americans                                                                                                                      | 2 |  |  |  |  | 2 |
| Stigmatized biologies: Examining the cumulative effects of oral health disparities for Mexican American farmworker children                                               | 2 |  |  |  |  | 2 |
| Strategies and dental care in the treatment of patients with myelomeningocele                                                                                             | 2 |  |  |  |  | 2 |
| Streptococcus mutans detection in saliva and colostrum samples                                                                                                            | 2 |  |  |  |  | 2 |
| Student self-confidence in coping with uncooperative behaviours in paediatric dentistry                                                                                   | 2 |  |  |  |  | 2 |
| Students' clinical learning in an emerging dental school: an investigation in international collaboration between Michigan and Ghana                                      | 2 |  |  |  |  | 2 |
| Studies in dental public health administration                                                                                                                            | 2 |  |  |  |  | 2 |
| Studies on oral health in mentally retarded adults                                                                                                                        | 2 |  |  |  |  | 2 |
| Study for improvement of oral health among the elderly. Present status of dental care service at elderly homes]                                                           | 2 |  |  |  |  | 2 |
| Study of fear of dental treatments in pediatrics in Sénégal]                                                                                                              | 2 |  |  |  |  | 2 |
| Subgingival Microbiota during Healthy Pregnancy and Pregnancy Gingivitis                                                                                                  | 2 |  |  |  |  | 2 |
| Subjective impact of minimally invasive dentistry in the oral health of older patients                                                                                    | 2 |  |  |  |  | 2 |
| Substance abuse: case management and dental treatment                                                                                                                     | 2 |  |  |  |  | 2 |
| Summary of: Oral health, dental prophylaxis and catheter related bloodstream infections in home parenteral nutrition patients: results of a UK survey and cohort study    | 2 |  |  |  |  | 2 |
| Supply decisions among dentists working within a fixed-fee system of dental care provision                                                                                | 2 |  |  |  |  | 2 |
| Surgical dental treatment for military personnel: where and when?--a case report                                                                                          | 2 |  |  |  |  | 2 |
| Survey of ambulatory surgery dentistry                                                                                                                                    | 2 |  |  |  |  | 2 |
| Survey of medical doctors' attitudes and knowledge of the association between oral health and pregnancy outcomes                                                          | 2 |  |  |  |  | 2 |
| Survey of Michigan dentists and radiation oncologists on oral care of patients undergoing head and neck radiation therapy                                                 | 2 |  |  |  |  | 2 |
| Sustainability of Improvement in Oral Health-Related Quality of Life in Children After Dental Treatment                                                                   | 2 |  |  |  |  | 2 |
| Symptoms of depression and anxiety in relation to dental health behavior and self-perceived dental treatment need                                                         | 2 |  |  |  |  | 2 |
| Systematic review of the medication list: a resource for risk assessment and dental management                                                                            | 2 |  |  |  |  | 2 |
| Systemic sclerosis: Update for oral health care providers                                                                                                                 | 2 |  |  |  |  | 2 |
| Target outcomes for long-term oral health care in dementia: a Delphi approach                                                                                             | 2 |  |  |  |  | 2 |
| Teaching dental students to interact with survivors of traumatic events: development of a two-day module                                                                  | 2 |  |  |  |  | 2 |
| Teatro mudo como alternativa de educação em saúde bucal com indígenas no Estado do Pará/ Silent theater as educational alternative in oral health with indigenous in Pará | 2 |  |  |  |  | 2 |
| Techniques for managing behaviour in pediatric dentistry: comparative study of live modelling and tell-show-do based on children's heart rates during treatment           | 2 |  |  |  |  | 2 |
| Teeth and periodontium status of moderately mentally retarded children and the health awareness of their parents]                                                         | 2 |  |  |  |  | 2 |
| Testing of Lithuanian version of the Oral Health Impact Profile-14 among older adults. A Pilot study                                                                      | 2 |  |  |  |  | 2 |
| Testing responsiveness to change for the early childhood oral health impact scale (ECOHIS)                                                                                | 2 |  |  |  |  | 2 |
| The acts governing the practice of dentistry and the provision of dental treatment to children by public dental officers                                                  | 2 |  |  |  |  | 2 |

|                                                                                                                                                                                                      |   |  |  |  |  |   |
|------------------------------------------------------------------------------------------------------------------------------------------------------------------------------------------------------|---|--|--|--|--|---|
| The Adverse Impact of Thalassemia Major on Adolescents' Oral Health-related Quality of Life                                                                                                          | 2 |  |  |  |  | 2 |
| The Analysis of Dental Treatment under General Anaesthesia in Medically Compromised and Healthy Children                                                                                             | 2 |  |  |  |  | 2 |
| The Anesthetic Management for a Patient With Trisomy 13                                                                                                                                              | 2 |  |  |  |  | 2 |
| The appropriate use of physical restraint: considerations                                                                                                                                            | 2 |  |  |  |  | 2 |
| The association between low-socioeconomic status mother's Sense of Coherence and their child's utilization of dental care                                                                            | 2 |  |  |  |  | 2 |
| The association between oral health literacy and oral health behaviors in North Korean defectors: a cross-sectional study                                                                            | 2 |  |  |  |  | 2 |
| The attitude of chronic hemodialysis patients toward dental treatment                                                                                                                                | 2 |  |  |  |  | 2 |
| The Changes in Dentists' Perception and Patient's Acceptance on Amalgam Restoration in Kurdistan-Iraq: A Questionnaire-based Cross-Sectional Study                                                   | 2 |  |  |  |  | 2 |
| The changing public/private mix in dentistry in the UK--a supply-side perspective                                                                                                                    | 2 |  |  |  |  | 2 |
| The characteristic of oral status and dental treatment of leprosy sequelae patients]                                                                                                                 | 2 |  |  |  |  | 2 |
| The child's first dental visit. Age, reasons, oral health status and dental treatment needs among children in Southern Poland                                                                        | 2 |  |  |  |  | 2 |
| The clinically related predictors of dental fear in Taiwanese children                                                                                                                               | 2 |  |  |  |  | 2 |
| THE COST MINIMIZATION ANALYSIS OF AN OUTREACH DENTAL SERVICE: A PILOT STUDY AT AKINYELE LOCAL GOVERNMENT AREA IN NIGERIA                                                                             | 2 |  |  |  |  | 2 |
| The crisis of women and at-risk populations needing dental care in Tennessee: challenges and engagement efforts                                                                                      | 2 |  |  |  |  | 2 |
| The dental assessment of the patient waiting for a liver transplant]                                                                                                                                 | 2 |  |  |  |  | 2 |
| The dental health and preventative habits of cardiac patients attending the Royal Hospital for Sick Children Glasgow                                                                                 | 2 |  |  |  |  | 2 |
| The dental patient on oral anticoagulant medication: a literature review                                                                                                                             | 2 |  |  |  |  | 2 |
| The dental status and attitudes of patients at risk from infective endocarditis                                                                                                                      | 2 |  |  |  |  | 2 |
| The dental status and need for dental treatment among Finnish conscripts                                                                                                                             | 2 |  |  |  |  | 2 |
| The dentist in the circle of care of dependent elderly]                                                                                                                                              | 2 |  |  |  |  | 2 |
| The diabetic patient and dental treatment: an update                                                                                                                                                 | 2 |  |  |  |  | 2 |
| The diabetic patient in the dental clinic, update and innovation]                                                                                                                                    | 2 |  |  |  |  | 2 |
| The differences of patient satisfaction level in public and private hospitals in Makassar, Indonesia                                                                                                 | 2 |  |  |  |  | 2 |
| The effect of a "universal antiretroviral therapy" recommendation on HIV RNA levels among HIV-infected patients entering care with a CD4 count greater than 500/ $\mu$ L in a public health setting  | 2 |  |  |  |  | 2 |
| The effect of dental education and dental treatment on the dental status of a handicapped population: a longitudinal study                                                                           | 2 |  |  |  |  | 2 |
| The effect of dental treatment on oral health-related quality of life in adolescents                                                                                                                 | 2 |  |  |  |  | 2 |
| The Effect of Dental Treatment under General Anesthesia on Quality of Life and Growth and Blood Chemistry Parameters in Uncooperative Pediatric Patients with Compromised Oral Health: A Pilot Study | 2 |  |  |  |  | 2 |
| The effect of general anesthesia for ambulatory dental treatment on children in Chongqing, Southwest China                                                                                           | 2 |  |  |  |  | 2 |
| The Effect of Physician Oral Health Services on Dental Use and Expenditures under General Anesthesia                                                                                                 | 2 |  |  |  |  | 2 |
| The effectiveness of the yellow card warning system for paediatric cardiology patients                                                                                                               | 2 |  |  |  |  | 2 |

|                                                                                                                                                        |   |  |  |  |  |   |
|--------------------------------------------------------------------------------------------------------------------------------------------------------|---|--|--|--|--|---|
| The effects of dental anxiety and irregular attendance on referral for dental treatment under sedation within the National Health Service in London    | 2 |  |  |  |  | 2 |
| The Effects of Dental Status and Chewing Efficiency on the Oral-Health-Related Quality of Life of Nursing-Home Residents                               | 2 |  |  |  |  | 2 |
| The elderly patient: no reason to worry!?                                                                                                              | 2 |  |  |  |  | 2 |
| The evaluation of a managed dental delivery concept                                                                                                    | 2 |  |  |  |  | 2 |
| The evaluation of developmental enamel defects and dental treatment conditions in a group of Turkish children with congenital heart disease            | 2 |  |  |  |  | 2 |
| The evaluation of oral health-related factors on the quality of life of the elderly in Babol                                                           | 2 |  |  |  |  | 2 |
| The Evaluation of Saliva Flow Rate, pH, Buffer Capacity, Microbiological Content and Indices of Decayed, Missing and Filled Teeth in Behçet's Patients | 2 |  |  |  |  | 2 |
| The factor structure of the dental fear survey applied to private general practice patients awaiting dental treatment                                  | 2 |  |  |  |  | 2 |
| The family impact of dental general anaesthesia in children: A meta-analysis                                                                           | 2 |  |  |  |  | 2 |
| The feasibility of office-based propofol sedation for dental care in patients with intellectual disability by sedation practitioners                   | 2 |  |  |  |  | 2 |
| The future need for dental treatment in Canada                                                                                                         | 2 |  |  |  |  | 2 |
| The global burden of oral diseases in pediatric HIV-infected populations: a workshop report                                                            | 2 |  |  |  |  | 2 |
| The growing importance of dental services in rural America                                                                                             | 2 |  |  |  |  | 2 |
| The healthcare system and the provision of oral healthcare in EU Member States: France                                                                 | 2 |  |  |  |  | 2 |
| The healthcare system and the provision of oral healthcare in European Union member states. Part 7: Republic of Ireland                                | 2 |  |  |  |  | 2 |
| The impact of childhood sexual abuse on dental fear                                                                                                    | 2 |  |  |  |  | 2 |
| The Impact of Dementia on Oral Health and Dental Care, Part 2: Approaching and Planning Treatment                                                      | 2 |  |  |  |  | 2 |
| The impact of medication-related osteonecrosis of the jaws on the quality of life in cancer patients                                                   | 2 |  |  |  |  | 2 |
| The impact of national health insurance coverage on pit and fissure sealing experience                                                                 | 2 |  |  |  |  | 2 |
| The impact of oral health on the quality of life in the elderly                                                                                        | 2 |  |  |  |  | 2 |
| The impact of oral health on the quality of life of young patients with congenital cardiac disease                                                     | 2 |  |  |  |  | 2 |
| The impact of oral rehabilitation on oral health-related quality of life in patients receiving radiotherapy for the treatment of head and neck cancer  | 2 |  |  |  |  | 2 |
| The impact of oro-facial pain conditions on oral health-related quality of life: A systematic review                                                   | 2 |  |  |  |  | 2 |
| The impact of providing dental services to frail older adults: perceptions of elders in adult day health centers                                       | 2 |  |  |  |  | 2 |
| The implications and management of acute odontogenic infection in association with Down and Eisenmenger syndromes and schizophrenia in a rural setting | 2 |  |  |  |  | 2 |
| The implications of protocol-based care on dental services in the military                                                                             | 2 |  |  |  |  | 2 |
| The implications of visual impairment in an elderly population in recognizing oral disease and maintaining oral health                                 | 2 |  |  |  |  | 2 |
| The Importance of Integrated Healthcare in the Association Between Oral Health and Awareness of Periodontitis and Diabetes in Type 2 Diabetics         | 2 |  |  |  |  | 2 |
| The importance of the evaluation of expectations and perceptions to improve the dental service quality                                                 | 2 |  |  |  |  | 2 |

|                                                                                                                                                         |   |  |  |  |  |   |
|---------------------------------------------------------------------------------------------------------------------------------------------------------|---|--|--|--|--|---|
| The influence of oral health conditions, socioeconomic status and home environment factors on schoolchildren's self-perception of quality of life       | 2 |  |  |  |  | 2 |
| The influence of oral health status on speech intelligibility, articulation and quality of life of older community-dwelling people                      | 2 |  |  |  |  | 2 |
| The influence of socio-demographic and psychological variables on the level of satisfaction of geriatric patients from dental care]                     | 2 |  |  |  |  | 2 |
| The influence of the volume of dental treatment on change in self-reported oral health                                                                  | 2 |  |  |  |  | 2 |
| The integrated care pathway of nephrology and dental teams to manage complex renal and postkidney transplant patients in dentistry: A holistic approach | 2 |  |  |  |  | 2 |
| The knowledge of healthcare professionals regarding elderly persons' oral care                                                                          | 2 |  |  |  |  | 2 |
| The law and ethics in dentistry: a recent Human Rights Tribunal judgment with further guidelines concerning dental treatment of HIV-positive patients   | 2 |  |  |  |  | 2 |
| The law and ethics in relation to dentists treating HIV-positive patients: two recent court cases                                                       | 2 |  |  |  |  | 2 |
| The level of dental anxiety and dental status in adult patients                                                                                         | 2 |  |  |  |  | 2 |
| The long-term effects of chemo radiotherapy on oral health and dental development in childhood cancer                                                   | 2 |  |  |  |  | 2 |
| The medical-dental interactions scanner: an Electronic Health Record-integrated quality and safety module for medical-dental interactions]              | 2 |  |  |  |  | 2 |
| The mentally retarded and the dental health services. Treatment needs and preventive strategies]                                                        | 2 |  |  |  |  | 2 |
| The moderating role of dental expectancies on the relationship between cognitive vulnerability and dental fear in children and adolescents              | 2 |  |  |  |  | 2 |
| The need and availability of dental services for terminally ill cancer patients: a nationwide survey in Japan                                           | 2 |  |  |  |  | 2 |
| The need for further oral health research surrounding the provision of dental treatment for people with drug dependency                                 | 2 |  |  |  |  | 2 |
| The need for geriatric dental education                                                                                                                 | 2 |  |  |  |  | 2 |
| The need for geriatric dental education in India: the geriatric health challenges of the millennium                                                     | 2 |  |  |  |  | 2 |
| The need for repeated dental care under general anaesthesia in children                                                                                 | 2 |  |  |  |  | 2 |
| The oral health and attitudes to dental treatment of a dentate elderly population in Mosgiel, Dunedin                                                   | 2 |  |  |  |  | 2 |
| The oral health needs of children, adolescents and young adults affected by a mucopolysaccharide disorder                                               | 2 |  |  |  |  | 2 |
| The oral health of long-term residents of a hospital for the intellectually handicapped and psychiatrically ill                                         | 2 |  |  |  |  | 2 |
| The oral health of psychiatric in-patients in South Wales                                                                                               | 2 |  |  |  |  | 2 |
| The oral health of refugees: Issues and challenges arising from a case series analysis                                                                  | 2 |  |  |  |  | 2 |
| The oral health status and dental care of adults with limited incomes]                                                                                  | 2 |  |  |  |  | 2 |
| The oral health status and the treatment needs in Chad: a pilot study                                                                                   | 2 |  |  |  |  | 2 |
| The oral health status in a sample of recruits from different regions of Italy]                                                                         | 2 |  |  |  |  | 2 |
| The oral health status of 4,732 adults with intellectual and developmental disabilities                                                                 | 2 |  |  |  |  | 2 |
| The oral health status of children undergoing hemodialysis treatment                                                                                    | 2 |  |  |  |  | 2 |
| The oral health status of emergency dental patients in Austria]                                                                                         | 2 |  |  |  |  | 2 |

|                                                                                                                                                                                                           |   |  |  |  |  |   |
|-----------------------------------------------------------------------------------------------------------------------------------------------------------------------------------------------------------|---|--|--|--|--|---|
| The oral health status of special olympics athletes in Belgium                                                                                                                                            | 2 |  |  |  |  | 2 |
| The oral health status of Syrian refugee children in Jordan: An exploratory study                                                                                                                         | 2 |  |  |  |  | 2 |
| The oral health status, treatment needs, and dental utilization patterns of Native American elders                                                                                                        | 2 |  |  |  |  | 2 |
| The oral hygiene, dental health and prosthetic care of old age home pensioners and geriatric patients. A study at the Adullam Foundation in Basel]                                                        | 2 |  |  |  |  | 2 |
| The oral status and dental treatment needs of the older population in West Zealand County]                                                                                                                | 2 |  |  |  |  | 2 |
| The patient with cancer                                                                                                                                                                                   | 2 |  |  |  |  | 2 |
| The perceptions of homeless people in Stockholm concerning oral health and consequences of dental treatment: a qualitative study                                                                          | 2 |  |  |  |  | 2 |
| The perioperative dental screening and management of patients undergoing cardiothoracic, vascular surgery and other cardiovascular invasive procedures: A systematic review                               | 2 |  |  |  |  | 2 |
| The potential oral health impact of cost barriers to dental care: findings from a Canadian population-based study                                                                                         | 2 |  |  |  |  | 2 |
| The preterm child in dentistry. Behavioural aspects and oral health                                                                                                                                       | 2 |  |  |  |  | 2 |
| The Probability of Resistant Hypertension During Dental Treatment of Chronic Kidney Disease Patients                                                                                                      | 2 |  |  |  |  | 2 |
| The provision of dental treatment for children under general anaesthesia                                                                                                                                  | 2 |  |  |  |  | 2 |
| The psychological impact of prosthodontic treatment--a discrete response modelling approach                                                                                                               | 2 |  |  |  |  | 2 |
| The psychosocial impact of dental aesthetics questionnaire--translation and cross-cultural validation in Croatia                                                                                          | 2 |  |  |  |  | 2 |
| The relationship between cigarette smoking and perceived dental treatment needs in the United States, 1988-1994                                                                                           | 2 |  |  |  |  | 2 |
| The relationship between dental anxiety and dental pain in children aged 18 to 59 months: a study in Recife, Pernambuco State, Brazil                                                                     | 2 |  |  |  |  | 2 |
| The relationship between dietary factors and susceptibility of periodontal disease]                                                                                                                       | 2 |  |  |  |  | 2 |
| The relationship between oral health education and quality of life in adolescents                                                                                                                         | 2 |  |  |  |  | 2 |
| The relationship between portable school-based oral health prevention services and subsequent oral health treatment                                                                                       | 2 |  |  |  |  | 2 |
| The relationship between registration and dental health benefit in 8- and 9-year-old children in Cheshire                                                                                                 | 2 |  |  |  |  | 2 |
| The relationship between socio-dental indices of handicap, felt need for dental treatment and dental state in a group of frail and functionally dependent older adults                                    | 2 |  |  |  |  | 2 |
| The relevance of alcohol to dental practice                                                                                                                                                               | 2 |  |  |  |  | 2 |
| The response rate problem in oral health surveys of older adults in Ontario                                                                                                                               | 2 |  |  |  |  | 2 |
| The role of hospital-based dentistry in providing treatment for persons with developmental delay                                                                                                          | 2 |  |  |  |  | 2 |
| The role of non-dental health professionals in providing access to dental care for low-income and minority patients                                                                                       | 2 |  |  |  |  | 2 |
| The role of the restorative dentist in the diagnosis and maintenance phases of implant therapy--Part III: The restoration and maintenance of oral health prior to the provision of the implant prosthesis | 2 |  |  |  |  | 2 |
| The self-reported oral health status and behaviors of adults who are deaf and blind                                                                                                                       | 2 |  |  |  |  | 2 |
| The sensitivity of the Geriatric Oral Health Assessment Index to dental care                                                                                                                              | 2 |  |  |  |  | 2 |

|                                                                                                                                                                      |   |  |  |  |  |   |
|----------------------------------------------------------------------------------------------------------------------------------------------------------------------|---|--|--|--|--|---|
| The significance of oral health and dental treatment for the postoperative outcome of heart valve surgery                                                            | 2 |  |  |  |  | 2 |
| The significance of previous invasive and orthodontic treatment experiences on children's dental fear                                                                | 2 |  |  |  |  | 2 |
| The state of the health of the oral cavity and health behaviors                                                                                                      | 2 |  |  |  |  | 2 |
| The success of inhalation sedation for comprehensive dental care within the Community Dental Service                                                                 | 2 |  |  |  |  | 2 |
| The use of a self-report questionnaire for dental health status assessment: a preliminary study                                                                      | 2 |  |  |  |  | 2 |
| The use of interim therapeutic restorations in the virtual dental home system                                                                                        | 2 |  |  |  |  | 2 |
| The use of time study results in a system model for presenting dental care outcome                                                                                   | 2 |  |  |  |  | 2 |
| The vicious cycle of dental fear: exploring the interplay between oral health, service utilization and dental fear                                                   | 2 |  |  |  |  | 2 |
| The virtual dental home: a critique                                                                                                                                  | 2 |  |  |  |  | 2 |
| The Yad Sarah geriatric dental clinic, a different model                                                                                                             | 2 |  |  |  |  | 2 |
| Three-year changes in global oral health rating by elderly dentate adults                                                                                            | 2 |  |  |  |  | 2 |
| Time expended on managing molar incisor hypomineralization in a pediatric dental clinic in Nigeria                                                                   | 2 |  |  |  |  | 2 |
| To explore and develop a model to maintain and build upon a dental clinic open for all in developing regions, with a primary focus on India                          | 2 |  |  |  |  | 2 |
| Tobacco use, oral cancer screening, and oral disease burden in Indian women                                                                                          | 2 |  |  |  |  | 2 |
| Tooth brushing and utilization of dental services in Fiji (1998)                                                                                                     | 2 |  |  |  |  | 2 |
| Tooth loss and associated factors in elders: results from a national survey in Uruguay                                                                               | 2 |  |  |  |  | 2 |
| Tooth loss in middle-aged adults with diabetes and hypertension: Social determinants, health perceptions, oral impact on daily performance (OIDP) and treatment need | 2 |  |  |  |  | 2 |
| Tooth survival in institutionalized elderly Cape Coloreds from the Cape Peninsula of South Africa                                                                    | 2 |  |  |  |  | 2 |
| Tooth wear among patients suffering from mental disorders                                                                                                            | 2 |  |  |  |  | 2 |
| Toothache among dental patients attending a Nigerian secondary healthcare setting                                                                                    | 2 |  |  |  |  | 2 |
| Toothache and social and economic conditions among adolescents in Northeastern Brazil                                                                                | 2 |  |  |  |  | 2 |
| Toward a definition of the appropriateness of dental treatment                                                                                                       | 2 |  |  |  |  | 2 |
| Transcultural oral health care: 3. Dental care and treatment during the fast of Ramadan                                                                              | 2 |  |  |  |  | 2 |
| Transition in Dental Treatment Utilization in Jammu And Kashmir, India - A 10 Year Retrospective Study                                                               | 2 |  |  |  |  | 2 |
| Translation and validation of the Chinese version of GOHAI                                                                                                           | 2 |  |  |  |  | 2 |
| Traumatic fracture of anterior teeth in 12-year old Nigerian children                                                                                                | 2 |  |  |  |  | 2 |
| Travel medicine: an Australian perspective                                                                                                                           | 2 |  |  |  |  | 2 |
| Treatment and posttreatment effects of fluoride mouthrinsing after 17 years                                                                                          | 2 |  |  |  |  | 2 |
| Treatment modalities in a dental fear clinic and the relation with general psychopathology and oral health variables                                                 | 2 |  |  |  |  | 2 |
| Treatment needs and skill mix workforce requirements for prosthodontic care: a comparison of estimates using normative and sociodental approaches                    | 2 |  |  |  |  | 2 |
| Treatment of correctional center inmates at a public health department: a cooperative venture                                                                        | 2 |  |  |  |  | 2 |
| Treatment of dental phobia and quality of life]                                                                                                                      | 2 |  |  |  |  | 2 |

|                                                                                                                                                                |   |  |  |  |  |   |
|----------------------------------------------------------------------------------------------------------------------------------------------------------------|---|--|--|--|--|---|
| Treatment of oral infections prior to heart valve surgery does not improve long-term survival                                                                  | 2 |  |  |  |  | 2 |
| Treatment of patients with bleeding disorders                                                                                                                  | 2 |  |  |  |  | 2 |
| Treatment Outcomes and Assessment of Oral Health Related Quality of Life in Treated Hypodontia Patients                                                        | 2 |  |  |  |  | 2 |
| Treatment outcomes and dental anxiety in 18-year-olds with MIH, comparisons with healthy controls - a longitudinal study                                       | 2 |  |  |  |  | 2 |
| Trends in Dental Medication Prescribing in Australia during the COVID-19 Pandemic                                                                              | 2 |  |  |  |  | 2 |
| Trends in dental treatment, 1992 to 2007                                                                                                                       | 2 |  |  |  |  | 2 |
| Trends in oral health in young people in the Netherlands over the past 20 years: a study in a changing context                                                 | 2 |  |  |  |  | 2 |
| Trends in predoctoral education in geriatric dentistry                                                                                                         | 2 |  |  |  |  | 2 |
| Trends in treatment performed in the Phelophepa Dental Clinic: 1995-2000                                                                                       | 2 |  |  |  |  | 2 |
| Trends of oral health care and dental treatment needs in relation to molar incisor hypomineralisation defects: a study amongst a group of Iraqi schoolchildren | 2 |  |  |  |  | 2 |
| Type II diabetes and oral health: perceptions among adults with diabetes and oral/health care providers in Ghana                                               | 2 |  |  |  |  | 2 |
| Types of dental fear as barriers to dental care among African American adults with oral health symptoms in Harlem                                              | 2 |  |  |  |  | 2 |
| Undergraduate teaching in gerodontology in Leipzig and Zürich--a comparison of different approaches                                                            | 2 |  |  |  |  | 2 |
| Understanding dental status and treatment need of geriatric patients: oral health trends in an Indian population                                               | 2 |  |  |  |  | 2 |
| Understanding oral health beliefs and practices among Cantonese-speaking older Australians                                                                     | 2 |  |  |  |  | 2 |
| Understanding parents' oral health behaviors for their young children                                                                                          | 2 |  |  |  |  | 2 |
| Undiagnosed diabetes mellitus: a survey of dental outpatients in a tertiary hospital                                                                           | 2 |  |  |  |  | 2 |
| United States Air Force survey of dental needs, 1977: methodology and summary of findings                                                                      | 2 |  |  |  |  | 2 |
| University of Alberta dental students' outreach clinical experience: an evaluation of the program                                                              | 2 |  |  |  |  | 2 |
| Unmet dental needs and barriers to care for children with significant special health care needs                                                                | 2 |  |  |  |  | 2 |
| Upper aerodigestive tract cancer and oral health status before radiotherapy: A cross-sectional study of 154 patients                                           | 2 |  |  |  |  | 2 |
| Use of Evidence-Based Decision-Making in Comprehensive Dental Treatment of a Patient with Meth Mouth-A Case Report                                             | 2 |  |  |  |  | 2 |
| Use of oral health related quality of life measures in managed dental care organisations                                                                       | 2 |  |  |  |  | 2 |
| Use of patient self-report oral health outcome measures in assessment of dental treatment outcomes                                                             | 2 |  |  |  |  | 2 |
| Use of public dental services by elderly Brazilians: a multilevel analysis]                                                                                    | 2 |  |  |  |  | 2 |
| Use of questionnaires in screening for risk factors in the dental care of elderly patients]                                                                    | 2 |  |  |  |  | 2 |
| Use of sedation in dentistry                                                                                                                                   | 2 |  |  |  |  | 2 |
| Use of Virtual Reality for the Management of Anxiety and Pain in Dental Treatments: Systematic Review and Meta-Analysis                                        | 2 |  |  |  |  | 2 |
| Using Evidence-Based Dentistry in the Clinical Management of Methadone Maintenance Therapy Patients                                                            | 2 |  |  |  |  | 2 |
| Using morbidity and income data to forecast the variation of growth and employment in the oral healthcare sector                                               | 2 |  |  |  |  | 2 |

|                                                                                                                                                                     |   |  |  |  |  |   |
|---------------------------------------------------------------------------------------------------------------------------------------------------------------------|---|--|--|--|--|---|
| Using standardized patients to assess presentation of a dental treatment plan                                                                                       | 2 |  |  |  |  | 2 |
| Using subjective oral health status indicators to screen for dental care needs in older adults                                                                      | 2 |  |  |  |  | 2 |
| Utilisation of dental care at the University Dental Hospital, Southern Thailand                                                                                     | 2 |  |  |  |  | 2 |
| Utilisation of oral health services provided by non-dental health practitioners in developed countries: a review of the literature                                  | 2 |  |  |  |  | 2 |
| Utilisation of oral health services, oral health needs and oral health status in a peri-urban informal settlement                                                   | 2 |  |  |  |  | 2 |
| Utilisation of the Medicare Teen Dental Plan in NSW, 2008-2010                                                                                                      | 2 |  |  |  |  | 2 |
| Utilization of dental services by Finnish seamen                                                                                                                    | 2 |  |  |  |  | 2 |
| Utilization of free dental health care services provided to the perinatally infected human immunodeficiency virus children in Bangalore: longitudinal study         | 2 |  |  |  |  | 2 |
| Utilization of Oral Health Care Services by University Undergraduates in Lagos, Nigeria                                                                             | 2 |  |  |  |  | 2 |
| Utilization of oral health services network among children and adolescents with leukemia                                                                            | 2 |  |  |  |  | 2 |
| Validation and randomized control trial of the e-SAID, a computerized paediatric dental patient request form, to intervene in dental anxiety                        | 2 |  |  |  |  | 2 |
| Validation of a Chinese version of the Oral Health Impact Profile (OHIP)                                                                                            | 2 |  |  |  |  | 2 |
| Validation of a new, specific, complete, and short OHRQoL scale (QoLFAST-10) for wearers of implant overdentures and fixed-detachable hybrid prostheses             | 2 |  |  |  |  | 2 |
| Validation of a Persian version of the OIDP index                                                                                                                   | 2 |  |  |  |  | 2 |
| Validation of a Portuguese version of the Oral Health Impact Profile adapted to people with mild intellectual disabilities (OHIP-14-MID-PT)                         | 2 |  |  |  |  | 2 |
| Validation of a Romanian version of the short form of the oral health impact profile (OHIP-14) for use in an urban adult population                                 | 2 |  |  |  |  | 2 |
| Validation of Nepalese Oral Health Impact Profile14 and Assessment of Its Impact in Patients with Oral Submucous Fibrosis in Nepal                                  | 2 |  |  |  |  | 2 |
| Validation of the Geriatric Oral Health Assessment Index (GOHAI) in the Malay language                                                                              | 2 |  |  |  |  | 2 |
| Validation of the Korean version of the oral health impact profile among the Korean elderly                                                                         | 2 |  |  |  |  | 2 |
| Validation of the oral impact on daily performance frequency scale in Ibadan, Nigeria                                                                               | 2 |  |  |  |  | 2 |
| Validation of two complementary oral-health related quality of life indicators (OIDP and OSS 0-10 ) in two qualitatively distinct samples of the Spanish population | 2 |  |  |  |  | 2 |
| Validation the Oral Health Impact Profile (OHIP-14sp) for adults in Spain                                                                                           | 2 |  |  |  |  | 2 |
| Validity and reliability of remote dental screening by different oral health professionals using a store-and-forward telehealth model                               | 2 |  |  |  |  | 2 |
| Validity and reliability of the Persian version of the oral health impact profile (OHIP)-14                                                                         | 2 |  |  |  |  | 2 |
| Validity and utility of self-perceived need for dental treatment by adults and elderly]                                                                             | 2 |  |  |  |  | 2 |
| Validity of Self-perceived and Clinically Diagnosed Gingival Status among 12-15-year-old Children in Indonesia                                                      | 2 |  |  |  |  | 2 |
| Variation and change in the meaning of oral health related quality of life: a 'grounded' systems approach                                                           | 2 |  |  |  |  | 2 |

|                                                                                                                                                                |   |  |  |  |  |   |
|----------------------------------------------------------------------------------------------------------------------------------------------------------------|---|--|--|--|--|---|
| Variation in dental health in 70-year old men and women in Göteborg, Sweden. A cross-sectional epidemiological study including longitudinal and cohort effects | 2 |  |  |  |  | 2 |
| Variation in levels of anxiety to dental treatment among nonorphan and orphan children living under different systems                                          | 2 |  |  |  |  | 2 |
| Variations in the provision and cost of oral healthcare in 11 European countries: a case study                                                                 | 2 |  |  |  |  | 2 |
| Verifiable CPD paper: oral health of remand prisoners in HMP Brixton, London                                                                                   | 2 |  |  |  |  | 2 |
| Visitors' experiences of public and private dental care in Sweden in 1992-2012                                                                                 | 2 |  |  |  |  | 2 |
| Vulnerability and the psychosocial aspects of tooth loss in old age: a Southern Brazilian study                                                                | 2 |  |  |  |  | 2 |
| Water fluoridation and public health]                                                                                                                          | 2 |  |  |  |  | 2 |
| We are all scared for the baby': promoting access to dental services for refugee background women during pregnancy                                             | 2 |  |  |  |  | 2 |
| Welfare dental intervention improves employment and quality of life                                                                                            | 2 |  |  |  |  | 2 |
| Wenchuan earthquake: response of Chinese dental professionals                                                                                                  | 2 |  |  |  |  | 2 |
| West Midlands Care Home Dental Survey 2011: part 2. Results of clinical survey of care home residents                                                          | 2 |  |  |  |  | 2 |
| What are the self-reported unmet dental treatment needs of people living with HIV in British Columbia? A case of minority subpopulation in Canada              | 2 |  |  |  |  | 2 |
| What haematopoietic stem cell transplant patients think about health and oral care: A qualitative study in a Brazilian health service                          | 2 |  |  |  |  | 2 |
| What is the impact on families of children having dental treatment under general anaesthetic?                                                                  | 2 |  |  |  |  | 2 |
| What Pediatric Dentists Need to Know about Coronavirus Disease (COVID-19)                                                                                      | 2 |  |  |  |  | 2 |
| What should dental services for people with disabilities be like? Results of an Irish Delphi panel survey                                                      | 2 |  |  |  |  | 2 |
| What the dentist should know about a patient with HIV/AIDS                                                                                                     | 2 |  |  |  |  | 2 |
| What will be the new normal for the dental industry?                                                                                                           | 2 |  |  |  |  | 2 |
| When data conflict with practice: rethinking the use of prophylactic antibiotics before dental treatment                                                       | 2 |  |  |  |  | 2 |
| Which oropharyngeal factors are significant risk factors for obstructive sleep apnea? An age-matched study and dentist perspectives                            | 2 |  |  |  |  | 2 |
| Who will provide dental care for housebound people with oral problems?                                                                                         | 2 |  |  |  |  | 2 |
| Why has oral health promotion and prevention failed children requiring general anaesthesia for dental extractions?                                             | 2 |  |  |  |  | 2 |
| Why intravenous moderate sedation should be taught in graduate endodontic programs                                                                             | 2 |  |  |  |  | 2 |
| Willingness and ability to pay for unexpected dental expenses by Finnish adults                                                                                | 2 |  |  |  |  | 2 |
| Willingness to Pay for Mandibular Overdentures: A Societal Perspective                                                                                         | 2 |  |  |  |  | 2 |
| WITHDRAWN: Hypnosis for children undergoing dental treatment                                                                                                   | 2 |  |  |  |  | 2 |
| Women's HIV disclosure to the dentist: Does frequent contact matter?                                                                                           | 2 |  |  |  |  | 2 |
| Xerostomia and its impact on oral health-related quality of life]                                                                                              | 2 |  |  |  |  | 2 |
| Xylitol in the prevention of oral diseases                                                                                                                     | 2 |  |  |  |  | 2 |
| Legend: X = Reason for exclusion: 1 = included: 2 = not included                                                                                               |   |  |  |  |  |   |

Legend: X = Reason for exclusion; 1 = included; 2 = not included
